# Supplementary material
Source: PubMed Central journal article supplement (PMC6124249)
Supplement: mmc1.pdf [file mmc1.pdf]

| A            | B        | C        | D         | E         | F         | G          | H         | I             | J        | K                 | L                   | M       | N     |
|--------------|----------|----------|-----------|-----------|-----------|------------|-----------|---------------|----------|-------------------|---------------------|---------|-------|
| Book         | Notes    | FF       | Churchill | No.       | PCode     | L No.      | Age       | Stim          | hCG dose | Lap Date          | comments            | hCG-OCR | folls |
| L0           | *        |          |           | 1         | 1         | 134        | 28        | P2x2          | 3000     | 09/01/1969        |                     | 28h     | 2     |
| L0           | *        |          |           | 2         | 2         | 136        | 30        | P2x2          | 3000     | 13/01/1969        |                     |         | 3     |
| L0           | *        |          |           | 3         | 3 (1)     | 137        | 31        | gestyl 10.000 | 3000     | 16/01/1969        |                     | 28h     | 4     |
| L0           | *        |          | Folder 19 | 4         | 4 (1)     | 141        | 26        | P2x2          | 4500     | 10/03/1969        |                     | 30h     | 10    |
| L0           | *        |          |           | 5         | 5         | 142A       | 23        | ??no pergona  | 3000     | 28/03/1969        |                     | 42h     | poor  |
| L0           | *        |          |           | 6         | 6 (1)     | 142B       | 36        | P2x1          | 3000     | 28/03/1969        |                     | 31.75   | 4     |
| L0           | *        |          |           | 7         | 7 (1)     | 142C       | 21        | p2x3          | 3000     | 28/03/1969        |                     | 31.75   | 4     |
| L0           | *        |          |           | 8         | 8         | 144        | 21        | p1x6          | 6000     | 31/03/1969        |                     | 30.5    | 8     |
| L0           | *        |          | Folder 19 | 9         | 9 (1)     | 145        | 35        | P2x3          | 4500     | 05/04/1969        |                     |         | 7     |
| L0           | *        |          |           | 10        | 10 (1)    | 146        | 30        | Pergonal      |          | 07/04/1969        |                     |         | 3     |
| L0           | *        |          |           | 11        | 11        | 147        | 22        | P2            | 6000     | 10/04/1969        |                     |         | 6     |
| L0           | *        |          |           | 12        | 12        | 148        | 28        | P2x2          | 6000     | 10/04/1969        |                     | 29      | 4     |
| L0           | *        |          |           | 13        | 13 (1)    | 149        | 37        | P2x2          | 6000     | 12/04/1969        |                     |         | 2     |
| L0           | *        |          |           | 14        | 14 (1)    | 150        | NR        | P2x2          | 6000     | 16/04/1969        |                     |         | 11    |
| L0           | *        |          |           | 15        | 15        | 151        | NR        | P2            | 12,000   | 21/04/1969        |                     |         | ?     |
| L5           | x        |          |           | 16        | 3 (2)     | 152        | 31        | P2            | 6000     | 24/04/1969        |                     | 30.25   | 6     |
| L0           | *        |          |           | 17        | 16 (1)    | 153        | 34        | P2            | 10,000   | 24/04/1969        |                     | 31      | 4     |
| L0           | *        |          |           | 18        | 17        | 154        | 35        | P1x3          | 12,000   | 05/05/1969        |                     | 30.5    | 3     |
| L0           | *        |          |           | 19        | 18 (1)    | 155        | 30        | P2x2          | 10,000   | 05/05/1969        |                     | 31      | 10    |
| L0           | *        |          |           | 20        | 19        | 156        | 26        | P2x2          | 12,000   | 12/05/1969        |                     | 29.25   | 10    |
| L0           | scrap    |          | Folder 19 | 21        | 20 (1)    | 157        | 29        | P2x2          | 10,000   | 12/05/1969        |                     | 29.75   | 5     |
| L0           | *        |          |           | 22        | 21 (1)    | 159        | 24        | P2x2          | 1500     | 09/06/1969        |                     | 30.5    | 9     |
| L0           | *        |          |           | 23        | 22        | 160        | 31        | P2x2          | 1500     | 09/06/1969        |                     | 30.25   | 4     |
| L0           | *        |          |           | 24        | 13 (2)    | 161        | 37        | P2x2          | 3000     | 20/06/1969        |                     |         | 3     |
| L0           | *        |          |           | 25        | 23 (1)    | 162        | 30        | P3,2          | 1500     | 27/06/1969        |                     | 29.25   | 8     |
| L0           | *        |          |           | 26        | 24 (1)    | 163        | 32        | P3,2          | 1500     | 27/06/1969        |                     | 29.75   | 4     |
| L0/L1        | *        | x        | Folder 19 | 27        | 20 (2)    | 164        | 29        | P3,2          | 5000     | 30/06/1969        | syringe-formalin    | 29      | 6     |
| L0/L1        | RGE      | x        |           | 28        | 10 (2)    | 165        | 30        | P2, 3         | 5000     | 02/07/1969        | syringe-citrate     | 29h     | 13    |
| L0/L1        | RGE      | x        |           | 29        | 25 (1)    | 166        | 35        | P3, 2         | 1500     | 02/07/1969        | Syringe             | 29h     | 9     |
| L0/L1        | RGE      | x        |           | 30        | 14 (2)    | 167        | NR        | P2, 2         | 5000     | 02/07/1969        | syringe-citrate     |         | 9     |
| L1 only      | RGE      | x        |           | 31        | 26        | 168        | 28        | P3,2          | 3000     | 02/07/1969        | syringe-citrate     | 29.5    | 2     |
| <b>L0/L1</b> | <b>*</b> | <b>x</b> |           | <b>32</b> | <b>27</b> | <b>169</b> | <b>47</b> | <b>none</b>   |          | <b>09/07/1969</b> | <b>oophorectomy</b> |         |       |

|                 |               |           |                                          |           |               |                |           |             |             |                   |                         |              |            |
|-----------------|---------------|-----------|------------------------------------------|-----------|---------------|----------------|-----------|-------------|-------------|-------------------|-------------------------|--------------|------------|
| L0/L1           | *             | x         | Folder 19                                | 33        | 28 (1)        | 170            | 33        | P3, 2       | 5000        | 04/07/1969        | syringe-formalin        | 29           | 4          |
| L0/L1           | *             | x         |                                          | 34        | 29 (1)        | 171            | 26        | P3x2        | 3000        | 01/08/1969        | syringe-formalin        |              | 4          |
| L0/L1           | RGE           | x         |                                          | 35        | 9 (2)         | 172            | 35        | P3, 3       | 3000        | 14/08/1969        | syringe-citrate         | 29.5h        | 16         |
| L0/L1           | *             | x         |                                          | 36        | 6 (2)         | 173            | 36        | P3, 2       | 1000        | 08/09/1969        | syringe-citrate         |              | 3          |
| L0/L1           | x             | x         |                                          | 37        | 30 (1)        | 174            | 26        | P3,2,       | 1000        | 08/09/1969        | syringe-citrate         | 29.5         | 10         |
| L0/L1           | x             | x         |                                          | 38        | 31 (1)        | 175            | 35        | P3,2        | 1000        | 08/09/1969        | syringe-citrate         | 30           | 9          |
| L0/L1           | *             | x         |                                          | 39        | 32            | 176            | 34        | P3, 2       | 5000        | 11/09/1969        | syringe-formalin        |              | sclero     |
| L0/L1           | *             | x         |                                          | 40        | 25 (2)        | 177            | 35        | P3,2        | 5000        | 12/09/1969        | syringe-formalin        | 29.5         | 7          |
| L0/L1           | x             | x         |                                          | 41        | 33            | 178A           | 28        | P3,2,2      | 5000        | 15/09/1969        | syringe-formalin        | 29           | 5          |
| L0/L1           | x             |           |                                          | 42        | 34 (1)        | 178B           | 24        | P3,2        | 5000        | 15/09/1969        |                         | 29           | 8          |
| <b>L0/L1</b>    | <b>x</b>      | <b>x</b>  |                                          | <b>43</b> | <b>35</b>     | <b>179</b>     | <b>34</b> | <b>P2x3</b> | <b>5000</b> | <b>22/09/1969</b> | <b>Suction device-F</b> |              | <b>7</b>   |
| L0/L1           | <b>**odgh</b> | x         |                                          | 44        | 36 (1)        | 180            | 23        | P3x3        | 5000        | 25/09/1969        | SD-Citrate              | 29.25        | 15         |
| L0/L1           | odgh/T        | x         |                                          | 45        | 37 (1)        | 181            | 32        | P2x3        | 5000        | 06/10/1969        | SD-Citrate              | 28.75        | 11         |
| L0/L1           | odgh          | x         | Folder 19                                | 46        | 38 (1)        | 182            | 29        | P3x3        | 5000        | 06/10/1969        | SD-Citrate              | 29.5         | 17         |
| L0/L1           | x             | x         | Folder 19                                | 47        | 39 (1)        | 183            | 33        | P3,2,3      | 5000        | 13/10/1969        | SD-Citrate              | 29.25        | 6          |
| L0/L1           | x             | x         | Folder 19                                | 48        | 40            | 184            | 31        | P3x3        | 5000        | 13/10/1969        | SD-Citrate              | 29.5         | 5          |
| L0/L1           | x             | x         |                                          | 49        | 41            | 185            | 31        | P3x3        | 5000        | 13/10/1969        | SD-Citrate              | 30           | 5          |
| <b>L0/L1/H0</b> | <b>x</b>      | <b>x</b>  | <b>Folder 19</b>                         | <b>50</b> | <b>42 (1)</b> | <b>186</b>     | <b>28</b> | <b>P3x3</b> | <b>5000</b> | <b>23/10/1969</b> | <b>SD-Inseminated</b>   | <b>29.25</b> | <b>13</b>  |
| L0/L1/H0        | x             | x         |                                          | 51        | 29 (2)        | 187            | 27        | P3x3        | 3000        | 10/11/1969        | SD-?Inseminated         |              | 7          |
| <b>L1 only</b>  |               |           |                                          | <b>52</b> | <b>43</b>     | <b>188</b>     | <b>NR</b> |             |             | <b>10/11/1969</b> | <b>Syringe</b>          |              | <b>7</b>   |
| L0/L1/H0        | x             | x         | Folder 19                                | 53        | 44 (1)        | 189            | 32        | P3x3        | 5000        | 12/11/1969        | SD-Inseminated          | 29.5         | 10         |
| <b>L0/L1/H0</b> | <b>x</b>      | <b>x</b>  | <b>Folder 19</b>                         | <b>54</b> | <b>9 (3)</b>  | <b>190</b>     | <b>34</b> | <b>P3x3</b> | <b>5000</b> | <b>21/11/1969</b> | <b>SD-Inseminated</b>   | <b>29.5</b>  | <b>14</b>  |
| L0/L1/H0        | x             | x         |                                          | 55        | 45            | 191            | 34        | P3x3        | 1000        | 21/11/1969        | SD-Formalin             | 28.75        | 7          |
| L0/L1/H0        | x             | x         |                                          | 56        | 25 (2)        | 192            | 35        | P3x3        | 5000        | 24/11/1969        | SD-Formalin             | 29.5         | 10         |
| L0/L1/H0        | x             | x         | Folder 19                                | 57        | 46 (1)        | 193            | 31        | P3x3        | 5000        | 24/11/1969        | SD-Inseminated          | 29.25        | 11         |
| L0/L1/H0        | x             | x         |                                          | 58        | 13 (2)        | 194            | 33        | P3x3        | 5000        | 04/12/1969        | SD-Citrate              | 29.5         | 9          |
| <b>L0/L1/H0</b> | <b>x</b>      | <b>x</b>  |                                          |           |               |                | <b>28</b> | <b>P3x3</b> | <b>5000</b> | <b>08/12/1969</b> | <b>SD-Inseminated</b>   | <b>29.5</b>  | <b>6</b>   |
| <b>L0/L1/H0</b> | <b>x</b>      | <b>x</b>  |                                          |           |               | <b>196</b>     | <b>32</b> | <b>P3x3</b> | <b>5000</b> | <b>08/12/1969</b> | <b>SD-Inseminated</b>   |              | <b>8</b>   |
|                 |               | <b>**</b> | 1st full lap record on ODGH headed paper |           |               |                |           |             |             |                   |                         |              | <b>407</b> |
|                 |               |           |                                          |           |               |                |           |             |             |                   |                         |              |            |
|                 |               |           |                                          |           |               |                |           |             |             |                   |                         |              |            |
|                 |               |           |                                          |           |               |                |           |             |             |                   |                         |              |            |
|                 |               |           | <b>60 Procedures</b>                     |           |               |                |           |             |             |                   |                         |              |            |
|                 |               |           |                                          |           |               | <b>58 LORs</b> |           |             |             |                   |                         |              |            |

| O    | P                        | Q                                                    | R      | S          | T                        | U | V |
|------|--------------------------|------------------------------------------------------|--------|------------|--------------------------|---|---|
| eggs | fate                     | Comments 1                                           | ET num | Comments 2 | Monitoring               |   |   |
| 2    | fixed in 40% acetic acid |                                                      |        |            | Urine TE x 1 or 2, PD x1 |   |   |
| 2    | squashed- Tarkowski      | 1GV, 1 lost;streak ovaries - poor prognosis          |        |            |                          |   |   |
| 0    | GC fixed in formalin     |                                                      |        |            |                          |   |   |
| 2    | cultured                 | ?endometriosis                                       |        |            |                          |   |   |
| 0    |                          | endometriosis                                        |        |            |                          |   |   |
| 1    | cultured                 |                                                      |        |            |                          |   |   |
| 2    | cultured                 |                                                      |        |            |                          |   |   |
| 3    | citr/squash              |                                                      |        |            |                          |   |   |
| 1    | GV - formalin            |                                                      |        |            |                          |   |   |
| 1    | formalin                 |                                                      |        |            |                          |   |   |
| 4    | formalin                 |                                                      |        |            |                          |   |   |
| 0    |                          |                                                      |        |            |                          |   |   |
| 0    |                          |                                                      |        |            |                          |   |   |
| 2    | 1GV, 1 diak              |                                                      |        |            |                          |   |   |
| 0    |                          |                                                      |        |            |                          |   |   |
| 1    | Citr/squash MI           |                                                      |        |            |                          |   |   |
| 0    |                          |                                                      |        |            |                          |   |   |
| 2    | cultured                 |                                                      |        |            |                          |   |   |
| 6    | cultured                 |                                                      |        |            |                          |   |   |
| 7    | citr/fix                 |                                                      |        |            | Urine TE x 2 or 3, PD x1 |   |   |
| 1    | citr/fix                 |                                                      |        |            |                          |   |   |
| 3    |                          |                                                      |        |            |                          |   |   |
| 1    |                          |                                                      |        |            |                          |   |   |
| 1    | citr/fix                 |                                                      |        |            |                          |   |   |
| 3    |                          |                                                      |        |            |                          |   |   |
| 1    | citr/fix                 |                                                      |        |            |                          |   |   |
| 0    |                          | formalin - later examination                         |        |            |                          |   |   |
| 8    | citr/fix                 | FF E2; Citrate - 3 classic MI, GV                    |        |            |                          |   |   |
| 1    |                          | MI, beautiful chromosomes                            |        |            |                          |   |   |
| 7    |                          | PCO - citrate - 2MI                                  |        |            |                          |   |   |
| 1    |                          | Pathological ovary - 1 egg, citrate- no can score    |        |            |                          |   |   |
|      |                          | <b>Hysterectomy - ovaries to N saline - 1 MII/PB</b> |        |            |                          |   |   |

|            |                               |                                                                 |  |  |  |                |  |
|------------|-------------------------------|-----------------------------------------------------------------|--|--|--|----------------|--|
| 0          | egg degenerate                | 3rd laparoscopy                                                 |  |  |  |                |  |
| 1          |                               | Egg to formalin - taken to C. late                              |  |  |  |                |  |
| 3          |                               | GV, MI                                                          |  |  |  |                |  |
| 0          |                               | endometriosis - unsatisfactory case                             |  |  |  |                |  |
| 5          | citr/fix                      | citrate - GV, possible MII                                      |  |  |  |                |  |
| 5          | citr/fix                      | damaged, unhappy, 1 GV, 1MII/PB                                 |  |  |  |                |  |
| 1          |                               | sclerotic - poor response - GVs                                 |  |  |  |                |  |
| 1          | formalin                      | bloody - dark, unhappy egg, 1 damaged                           |  |  |  |                |  |
| 1          | sclerotic, endometriosis, a   | GV                                                              |  |  |  |                |  |
| 3          | formalin                      | GV( Lancet?), 2 MI (formalin)                                   |  |  |  |                |  |
| <b>0</b>   | <b>formalin</b>               | <b>endometriosis - not a good case</b>                          |  |  |  |                |  |
| 4          | citr/fix                      | Citrate - MII, MI v nice                                        |  |  |  |                |  |
| 5          | 3 citr/fix, 2 to JHM          | 2 fixed in GTA for JHM; GV, MI                                  |  |  |  |                |  |
| 2          | 1 v.unhappy                   | citrate - 2 + 1 v.unhappy                                       |  |  |  |                |  |
| 2          | citr/fix                      | MII                                                             |  |  |  |                |  |
| 2          | citr/fix                      | MI/GV                                                           |  |  |  |                |  |
| 1          | citr/fix                      | MII                                                             |  |  |  |                |  |
| <b>6</b>   | <b>cultured in 10%FF/Tyr</b>  | <b>2GV, 2MII - FIRST INSEMINATION</b>                           |  |  |  |                |  |
| <b>1</b>   | Sperm prep done?Insem         | GV flushed with HepSaline                                       |  |  |  | TE x 3, PD x1  |  |
| <b>3</b>   | <b>Human Control</b>          | <b>GV, Diak., MII atretic</b>                                   |  |  |  |                |  |
| <b>3</b>   | GC to formalin                | GV, MI, slightly atretic GV                                     |  |  |  |                |  |
| <b>4</b>   | <b>cultured; 1 fertilized</b> | <b>1 fert @16 hrs - FIRST FERTILIZATION</b>                     |  |  |  |                |  |
| 1          | v. unhappy                    | v. unhappy                                                      |  |  |  |                |  |
| 1          | v. degenerate                 | degenerate                                                      |  |  |  |                |  |
| <b>8</b>   | cultured, taken to Cambri     | cultured - to Cambridge - formalin                              |  |  |  | 1 ? Fertilized |  |
| 5          | all degenerate, fixed         | unhappy/atretic                                                 |  |  |  |                |  |
| <b>2</b>   | <b>cultured - Christie</b>    | <b>insem - to rabbit oviduct (couldn't see anything)</b>        |  |  |  |                |  |
| <b>3</b>   | <b>Cultured- Christie</b>     | <b>insem - to rabbit oviduct (couldn't see anything in egg)</b> |  |  |  |                |  |
| <b>136</b> |                               |                                                                 |  |  |  |                |  |
|            |                               |                                                                 |  |  |  |                |  |
|            |                               |                                                                 |  |  |  |                |  |
|            |                               |                                                                 |  |  |  |                |  |
|            |                               |                                                                 |  |  |  |                |  |

|  |  |  |                        |  |                        |  |  |  |  |  |
|--|--|--|------------------------|--|------------------------|--|--|--|--|--|
|  |  |  | <b>58 outcomes</b>     |  | <b>1 Oophorectomy</b>  |  |  |  |  |  |
|  |  |  | 407 Follicles          |  | <b>1 Human Control</b> |  |  |  |  |  |
|  |  |  | 136 eggs               |  |                        |  |  |  |  |  |
|  |  |  | 10 No eggs recovered   |  |                        |  |  |  |  |  |
|  |  |  | 7 Inseminations        |  |                        |  |  |  |  |  |
|  |  |  | <b>1st inseminated</b> |  |                        |  |  |  |  |  |
|  |  |  | <b>1st Fertilized</b>  |  |                        |  |  |  |  |  |
|  |  |  | <b>2 to rabbit</b>     |  |                        |  |  |  |  |  |

| A               | B        | C        | D                | E         | F             | G          | H         | I             | J           | K                  | L                        | M           | N         | O        |
|-----------------|----------|----------|------------------|-----------|---------------|------------|-----------|---------------|-------------|--------------------|--------------------------|-------------|-----------|----------|
| Book            | FF       | Notes    | Churchill        | No.       | P-Code        | L No.      | Age       | Stim          | hCG         | Lap                | comments                 | OCR(hrs)    | folfs     | eggs     |
| L0/L1/H0        | x        | *        |                  | 61        | 49 (1)        | 197        | 26        | NR            | NR          | 8-Jan-1970         | SD-F (RG)                | NR          | 9         | 2        |
| L0/L1/H0        | x        |          |                  | 62        | 21 (2)        | 198        | 29        | P3x3          | 5000        | 8-Jan-1970         | SD-F (RG + H)            |             | 13        | 12       |
| <b>L0/L1/H0</b> | <b>x</b> |          |                  | <b>63</b> | <b>34 (2)</b> | <b>199</b> | <b>24</b> | <b>P3x3</b>   | <b>5000</b> | <b>8-Jan-1970</b>  | <b>Tubal insemin</b>     |             |           | <b>0</b> |
| <b>L0/L1/H0</b> | <b>x</b> | <b>x</b> | <b>Folder 19</b> | <b>64</b> | <b>50 (1)</b> | <b>200</b> | <b>37</b> | <b>P3,5,5</b> | <b>5000</b> | <b>12-Jan-1970</b> | <b>SD-F+CI (RG)</b>      | <b>29.5</b> | <b>11</b> | <b>8</b> |
| L0/L1/H0        | x        | x        | Folder 19        | 65        | 51 (1)        | 201        | 31        | P3,5,5        | 5000        | 12-Jan-1970        | SD-F+CI (RG)             | 30.25       | 5         | 0        |
| L0/L1/H0        | x        | x        |                  | 66        | 52 (1)        | 202        | 25        | P3,5,5        | 5000        | 12-Jan-1970        | SD-F+CI (RG)             | 29.75       | 7         | 5        |
| L0/L1/H0        | x        |          |                  | 67        | 53            | 203        | 27        | P3 x 4        | 5000        | 12-Jan-1970        | SD-F+CI (RG)             | 30          | 12        | 7        |
| L1              | x        | *        | Folder 19        | 68        | 46 (2)        | 204        | 31        | NR            |             | 13-Jan-1970        | SD-F+CI (H)              |             | 15        | 5        |
| L0/L1/H0        | x        | x        |                  | 69        | 30 (2)        | 205        | 26        | P5x3          | 5000        | 29-Jan-1970        | SD-F+CI (H)              |             | 10        | 5        |
| L0/L1/H0        | x        | x        |                  | 70        | 54 (1)        | 206        | 26        | P5x3          | 5000        | 29-Jan-1970        | SD-F+CI (D)              |             | 10        | 4        |
| L0/L1/H0        | x        | x        |                  | 71        | 55            | 207        | 24        | P5x3          | 5000        | 29-Jan-1970        | SD-F+CI (H)              |             | 8         | 4        |
| L0/L1/H0        | x        | x        |                  | 72        | 31 (2)        | 208        | 36        | P5x3          | 5000        | 31-Jan-1970        | SD-F+CI (RG)             |             | 12        | 6        |
| L0/L1/H0        | x        | x        |                  | 73        | 56            | 209        | 24        | P5x2          | 5000        | 31-Jan-1970        | SD-F+CI (RG)             |             | 5         | 3        |
| L1              | x        | x        |                  | 74        | 9 (4)         | 210        | 35        | P5x3          | 5000        | 2-Feb-1970         | SD-F+CI (RG)             |             | 11        | 5        |
| L1              | x        | x        | Folder 19        | 75        | 44 (2)        | 211        | 31        | P5x3          | 5000        | 2-Feb-1970         | SD-F+CI (RG)             |             | 10        | 3        |
| L5              | x        |          | Folder 19        | 76        | 4 (2)         | 212        | 27        | P4x3          | 5000        | 16-Feb-1970        | SD-F+CI (H)              | 29.5        | 9         | 8        |
| L0/L1/H0        | x        | x        |                  | 77        | 7 (2)         | 213        | 22        | P4x3          | 5000        | 16-Feb-1970        | SD-F+CI (H)              |             | sev.      | 3        |
| L0/L1/H0        | x        | x        |                  | 78        | 16 (2)        | 214        | 35        | P4x3          | 5000        | 3-Mar-1970         | SD-F+CI (H)              | 29.5        | 9         | 0        |
| L0/L1/H0        | x        | x        | Folder 19        | 79        | 57 (1)        | 215        | 27        | P4x3          | 5000        | 3-Mar-1970         | SD-F+CI (D)              | 30          | 11        | 3        |
| L0/L1/H0        | x        | x        | Folder 19        | 80        | 42 (2)        | 216        | 38        | P4x3          | 5000        | 6-Mar-1970         | SD-F+CI (H)              | 29.5        | 12        | 3        |
| <b>L0/L1/H0</b> | <b>x</b> |          |                  | <b>81</b> | <b>58</b>     | <b>217</b> | <b>21</b> | <b>P4x3</b>   | <b>5000</b> | <b>12-Mar-1970</b> | <b>AIH</b>               |             |           | <b>0</b> |
| <b>L0/L1/H0</b> | <b>x</b> |          |                  | <b>82</b> | <b>59</b>     | <b>218</b> | <b>26</b> | <b>P4x3</b>   | <b>5000</b> | <b>12-Mar-1970</b> | <b>Tubal insemin/AIH</b> | <b>31</b>   |           | <b>0</b> |
| L0/L1/H0        | x        | x        |                  | 83        | 60 (1)        | 219        | 26        | P4x3          | 5000        | 12-Mar-1970        | SD-F+CI (H)              | 29.5        | 12        | 6        |
| L0/L1/H0        | x        | x        |                  | 84        | 61            | 220        | 26        | P4x3          | 5000        | 12-Mar-1970        | SD-F+CI (H)              | 29          | 5         | 2        |
| L0/L1/H0        | x        | x        |                  | 85        | 48 (2)        | 221        | 33        | P4x3          | 5000        | 16-Mar-1970        | SD-F+CI (H)              | 32          | 6         | 2        |
| <b>L0/L1/H0</b> | <b>x</b> | <b>x</b> |                  | <b>86</b> | <b>36 (2)</b> | <b>222</b> | <b>24</b> | <b>P4x3</b>   | <b>5000</b> | <b>16-Mar-1970</b> | <b>SD-F+CI (D)</b>       | <b>32</b>   | <b>18</b> | <b>8</b> |
| <b>L0/L1/H0</b> | <b>x</b> | <b>x</b> |                  | <b>87</b> | <b>62</b>     | <b>223</b> | <b>23</b> | <b>P4x3</b>   | <b>5000</b> | <b>16-Mar-1970</b> | <b>SD-F+CI (H)</b>       | <b>32.5</b> | <b>8</b>  | <b>4</b> |
| L0/L1/H0        | x        | x        |                  | 88        | 23 (2)        | 224        | 31        | P4x3          | 5000        | 23-Mar-1970        | SD-F+CI (H)              | 33          | 9         | 4        |
| L0/L1/H0        | x        | x        |                  | 87        | 63 (1)        | 225        | 36        | P4x3          | 5000        | 23-Mar-1970        | SD-F+CI (H)              | 33.25       | 5         | 1        |
| L0/L1/H0        | x        | x        |                  | 90        | 64            | 226        | 42        | P3x3          | 5000        | 23-Mar-1970        | SD-F+CI (H)              | 33.25       | 3         | 1        |
| L1/H0           | x        | x        | Folder 19        | 91        | 50 (2)        | 227        | 37        | NR            |             | 7-Apr-1970         | Syr-Fert                 |             | 10        | 1        |
| L1/H0           | x        | x        | Folder 19        | 92        | 52 (2)        | 228        | 26        | P3x3          | 5000        | 7-Apr-1970         | Syr-Fert                 |             | 9         | 3        |

|              |          |          |               |            |               |            |           |               |             |                    |                   |             |            |            |
|--------------|----------|----------|---------------|------------|---------------|------------|-----------|---------------|-------------|--------------------|-------------------|-------------|------------|------------|
| L1/H0        | x        | x        | Folder 19     | 93         | 28 (2)        | 229        | 34        | P4 x 3        | 5000        | 27-Apr-1970        | SD-F+Cl (H)       | 32.5        | 11         | 7          |
| L1/H0        | x        | x        |               | 94         | 30 (2)        | 230        | 28        | p4 x3         | 5000        | 11-May-1970        | SD-F+Cl (H)       | 32.25       | 8          | 4          |
| L2/H0        | x        | x        |               | 95         | 65            | 231        | 33        | p4 x3         | 5000        | 15-May-1970        | SD                | 32.5        | 1          | 0          |
| L2/H0        | x        | x        | Folder 19     | 96         | 44 (3)        | 232        | 31        | P4 x 3        | 5000        | 15-May-1970        | SD-F-H            | 32.5        | 7          | 4          |
| L2/H0        | x        | x        |               | 97         | 24 (2)        | 233        | 35        | P4 x 3        | 5000        | 15-May-1970        | SD-F-H            | 32.75       | 7          | 4          |
| L2/H0        | x        | x        | Folder 19     | 98         | 66            | 234        | 33        | P3 x 3        | 5000        | 4-Jun-1970         | SD-F-H            | 32.5        | 5          | 3          |
| L2/H0        | x        | x        |               | 99         | 60 (2)        | 235        | 27        | p4 X 3        | 5000        | 4-Jun-1970         | SD-F-H            | 32.75       | 11         | 9          |
| L2/H0        | x        | x        |               | 100        | 23 (3)        | 236        | 31        | P4 x 3        | 5000        | 8-Jun-1970         | damaged egg       | 32.75       | 6          | 1          |
| L2/H0        | x        | x        |               | 101        | 18 (2)        | 237        | 31        | P4 x 3        | 5000        | 12-Jun-1970        | SD-F-H/RG         | 32.75       | 14         | 8          |
| <b>L2</b>    |          |          |               | <b>102</b> | <b>67</b>     | <b>238</b> |           |               |             | <b>15-Jun-1970</b> | <b>laparotomy</b> |             |            |            |
| L2/H0        | x        | x        | Folder 19     | 103        | 39 (2)        | 239        | 34        | P3 x 3        | 5000        | 15-Jun-1970        | nothing done      |             | 9          | 1          |
| L2/H0        | x        | x        |               | 104        | 68 (1)        | 240        | 32        | P4 x 3        | 5000        | 29-Jun-1970        | SD-F-H            | 32.25       | 13         | 9          |
| L2/H0        | x        | x        | Folder 19     | 105        | 52 (3)        | 241        | 26        | P4,3,3        | 5000        | 02/07/1970         | SD-F-H            |             | 11         | 9          |
| L2/H0        | x        | x        | Folder 19     | 106        | 69 (1)        | 242        | 32        | P4 x 3        | 5000        | 02/07/1970         | SD-F-H/D          |             | 12         | 7          |
| L2/H1        | x        | x        |               | 107        | 37 (2)        | 243        | 33        | P4 x 3        | 5000        | 13/07/1970         | SD-F-H            | 32.25       | 8          | 6          |
| L2/H1        | x        | x        | Folder 19     | 108        | 70 (1)        | 244        | 26        | P4 x 3        | 5000        | 13/07/1970         | SD-F-H            | 32.5        | 5          | 2          |
| L2/H1        | x        | x        | Folder 19     | 109        | 57 (2)        | 245        | 24        | P4 x 3        | 5000        | 13/08/1970         | SD-F-H            | 32.5        | 6          | 1          |
| L2/H1        | x        | x        | Folder 19     | 110        | 71            | 246        | 33        | P4 x 3        | 5000        | 13/08/1970         | SD-F-H            | 32.5        | 17         | 8          |
| <b>L2/H1</b> | <b>x</b> | <b>x</b> |               | <b>111</b> | <b>42 (3)</b> | <b>247</b> | <b>22</b> | <b>P3 x 3</b> | <b>5000</b> | <b>17/08/1970</b>  | <b>SD-F-H</b>     | <b>32.5</b> | <b>12</b>  | <b>11</b>  |
| L2/H1        | x        | x        | Folder 19     | 112        | 38 (2)        | 248        | 30        | P4 x 3        | 5000        | 17/08/1970         | SD-F-H            | 32.5        | 9          | 6          |
| L2/H1        | x        | x        | Folder 11, EB | 113        | 72 (1)        | 249        | 33        | P4 x 3        | 5000        | 17/08/1970         | SD-F-H            | 32.5        | 7          | 8          |
| L2/H1        | x        | x        | Folder 19     | 114        | 73 (1)        | 250        | 25        | P4 x 3        | 5000        | 17/08/1970         | SD-F-H            | 32.5        | 4          | 2          |
| <b>L2</b>    |          |          |               | <b>115</b> | <b>74</b>     | <b>251</b> |           |               |             |                    |                   |             |            |            |
| L2/H1        | x        | x        | Folder 19     | 116        | 37 (3)        | 252        | 32        | P4 x 3        | 5000        | 24-Sep-1970        | SD-F-D            | 32.5        | 11         | 5          |
| L2/H1        | x        | x        |               | 117        | 49 (2)        | 253        | 26        | P4 x 3        | 5000        | 24-Sep-1970        | SD-F-RG           | 33          | 6          | 5          |
| L2/H1        | x        | x        |               | 118        | 21 (3)        | 254        | 29        | P4 x 3        | 5000        | 24-Sep-1970        | SD-F-D/RG         | 33          | 9          | 8          |
| L2/H1        | x        | x        | Folder 19     | 119        | 75 (1)        | 255        | 30        | P3 x 4        | 5000        | 28-Sep-1970        | SD-F-H            | 32.5        | 7          | 3          |
| L2/H1        | x        | x        | Folder 19     | 120        | 52 (4)        | 256        | 26        | P3 x 4        | 5000        | 28-Sep-1970        | SD-F-H            |             | 7          | 5          |
| L2/H1        | x        | x        |               | 121        | 76            | 257        | NR        | P4 x 3        | 5000        | 29-Nov-1970        | SD-F-H            | 31.25       | 10         | 10         |
| L2/H1        | x        | x        |               | 122        | 77            | 258        | NR        | P4 x 3        | 5000        | 29-Nov-1970        | SD-F-H            | 31.75       | 9          | 9          |
| L2/H1        | x        | x        |               | 123        | 78            | 259        | 40        | P4 x 3        | 5000        | 2-Dec-1970         | SD- not insem     | 32          | 10         | 1          |
| L2/H1        | x        | x        |               | 124        | 79 (1)        | 260        | 28        | P4 x 3        | 5000        | 2-Dec-1970         | no eggs           | 32          | 3          | 0          |
|              |          |          |               |            |               |            |           |               |             |                    |                   |             | <b>519</b> | <b>274</b> |

| <b>P</b>     | <b>Q</b>                                                                |
|--------------|-------------------------------------------------------------------------|
| <b>insem</b> | <b>outcome</b>                                                          |
|              | 1GV, degenerate, 1 cultured to ?MI no fert                              |
|              | some eggs damaged - too much suction -no fert                           |
|              | <b>Tubal insem</b>                                                      |
|              | <b>4c, 2morula, 8-16c-fixed - FIRST EMBRYOS</b>                         |
|              | no eggs                                                                 |
|              | no fert                                                                 |
|              | no fert                                                                 |
|              | 4c, 8c (Beauty) -fixed                                                  |
|              | 7-8c, fixed                                                             |
|              | no fert - fixed                                                         |
|              | MII - fixed ( <i>"husband not so keen after publicity"</i> )            |
|              | MII - 1 with 2 small nuclei                                             |
|              | MII 1PB                                                                 |
|              | all unfert                                                              |
|              | 4-5c, 6c - fixed                                                        |
|              | 1 4c - fixed                                                            |
|              | bad response, sclerotic ovaries                                         |
|              | no eggs                                                                 |
|              | 1 4c -photographed                                                      |
|              | GV, 1?2pn -fixed                                                        |
|              | <b>AIH: sperm dropped onto ampulla</b>                                  |
|              | <b>tubal insem (AIH)</b>                                                |
|              | no fert                                                                 |
|              | unfert MII, 2 degen - fixed                                             |
|              | I MII, 1x2PN- fixed                                                     |
|              | <b>fert &amp; cleavage in both media, 3 (4-6c)- 2-Christie (Rabbit)</b> |
|              | <b>superb 8c in 0.36%; ?8c in 1%; 1 - Christie (Rabbit)</b>             |
|              | no fert - 2degen + 1 GV fixed                                           |
|              | no cleavage- fixed                                                      |
|              | clear 4c on 28/3, no change 29/3 - fixed                                |
|              | not fert - fixed                                                        |
|              | not fert - fixed                                                        |



| <b>R</b>                                             | <b>S</b>                                                            |
|------------------------------------------------------|---------------------------------------------------------------------|
| <b>comments/Media</b>                                | <b>Monitoring/comments</b>                                          |
| cultured for fert, as 198                            | TE x 4 or 5, PD x 1                                                 |
| insem - small microdrops, FF60%/B's 40%              |                                                                     |
| <b>lap for sperm to oviduct</b>                      |                                                                     |
| <b>FF/BB, then Special B, then Whit added</b>        |                                                                     |
|                                                      |                                                                     |
| as 200                                               |                                                                     |
| as 200                                               |                                                                     |
| liq paraffin microdrops Barry's B 1:1, fert in Whitt |                                                                     |
| W/Tyr (high pH)                                      |                                                                     |
| 50% Barry's B-new, high pH, then Dave's              |                                                                     |
| as 206                                               |                                                                     |
| 1:1 Whitt, then fresh Whitt, 1/10                    |                                                                     |
| as 208                                               |                                                                     |
| individual drops                                     |                                                                     |
| fed: 1:1 Whitt:Weymouth's + 15% FCS                  |                                                                     |
| 50:50 Weymouth's/TyrB                                |                                                                     |
|                                                      |                                                                     |
| modified Weym. - +pyr, BSA,bicarb - pH7.5, osm 325   |                                                                     |
| as 215                                               |                                                                     |
|                                                      |                                                                     |
| <b>sperm to R oviduct</b>                            |                                                                     |
| Tyr B +.36% BSA                                      |                                                                     |
| pH of TyrB too high - prob. 7.8+?poor gassing        |                                                                     |
| one in .35%BSA, one in 1% BSA                        |                                                                     |
| <b>FF/50% Barry'sB, then as 221 (2 to rabbit)</b>    | <b>human egg in rabbit: 1c</b>                                      |
| <b>as 221 (1 to rabbit)</b>                          | <b>L:2 rabbit 1c eggs; R: 6 rabbit eggs, 1 human egg, 1c, fixed</b> |
| Dave's 302, Dave's + H2O 285, Tyr 0.36/300, 199/292  | BSA: Behringwerke(Barry's & 199), Pentex (Dave's)                   |
|                                                      |                                                                     |
| M199 + 0.36% BSA + pyr+ lactate + bicarb             |                                                                     |
| M199 + 0.36% BSA + pyr+ lactate + bicarb             |                                                                     |
| eggs damaged - transf to M199                        | Sperm viability test                                                |

|              |                                                                          |
|--------------|--------------------------------------------------------------------------|
|              | 4c, 8c, ?Morula? On 2/5                                                  |
|              | didn't look ovulatory; prob'ly abn cleavage thorough low osm.            |
|              | very poor response ?Post menopausal?                                     |
|              | Whitten's: 8c; David's: 1c fixed                                         |
|              | 8c, 4-6c on 18/5 -then degenerated (d3)                                  |
| 35.5         | 1c with 6-8 nuclei - Tarkowski stain                                     |
| 35.5         | overinseminated: GV, MII, 8c (photo)                                     |
|              | damaged, found in POD- ovulated during lap.                              |
|              | Whitten: 1x 8-16c; Whittingham: 2x8c, photo & fixed                      |
|              | <b>adhesions - did laparotomy, ovary full of endometriosis</b>           |
|              | nothing further done                                                     |
| 34.5         | Ham's: 2x 8c, 1x16c; David's: 2xGV, 1 degenerate                         |
|              | 6 no fert; 1x3c, 1x 3-4c all fixed in Acetic methanol                    |
|              | unfert, 1c - all fixed, formalin or ac. Methanol                         |
| 33.5         | 8-16c, mounted & photographed, fixed                                     |
| 33.5         | both 1c on 15/7                                                          |
| 38.25        | 1c, fixed 16/8                                                           |
| 37.5         | GVs, 1 x5-6c                                                             |
| <b>35.25</b> | <b>?? Blastocyst? - citrate, squashed &amp; fixed - FIRST BLASTOCYST</b> |
| 35           | large blastocyst 21/8 -citrate, flattened, ac etoh(negative for Y-body)  |
| 35           | 8c, 12-16c negative for Y-body                                           |
|              | 1c, mass of junk                                                         |
|              |                                                                          |
| 36           | 8c, morula, 3c - fixed                                                   |
| 35           | fully expanded blast - 112 nuclei, 18 mitoses; 2nd blast to Camb.        |
| 35           | all 1-c                                                                  |
|              | 1x8c                                                                     |
|              | 1x6c                                                                     |
| 33.5         | Reduced O2 - all 1-c - can't see                                         |
| 32.75        | Reduced O`2 - all 1-c - can't see                                        |
|              | suction pressure v. abnormal                                             |
|              | no eggs                                                                  |
|              |                                                                          |
|              |                                                                          |

|                                                          |  |
|----------------------------------------------------------|--|
| into David's 28/4                                        |  |
| 5% O2 throughout; Tyr/David's 1:1 - 1:3                  |  |
|                                                          |  |
| Barry'sB/0/75%NaCl, then Whitten's or David's            |  |
| TyrB -next day transf gradually to Whitten's,red. O2     |  |
| beautiful cell monolayers                                |  |
| fert in 234 sperm ; transf Whitten/Whittingham           |  |
|                                                          |  |
| 4 to Whitten's, 3 to Whittingham, 2 to Ham's F10         |  |
|                                                          |  |
|                                                          |  |
| 4 to Ham's F10, 3 to David's augmented                   |  |
| none look ovulatory; new Ham's                           |  |
| 2 fed w/ Ham's F10, 4 w/David's augmented, 20%FCS        |  |
| split between 40% Ham's & 20% Ham's                      |  |
| Tyr B + NaCl+Kcl, ph7.55                                 |  |
| egg looks nice but can't see into it                     |  |
| Ham's F10 + 20% FCS                                      |  |
| <b>Ham's F10 +20% human serum, inactivated</b>           |  |
| Ham's F10, new FCS 20%                                   |  |
| old batch FCS 20%                                        |  |
| old FCS                                                  |  |
|                                                          |  |
| Ham's, 20%FCS                                            |  |
| 20% FCS, 50% FCS, fed w/human serum                      |  |
| Ham's 20%FCS                                             |  |
| 20%, 50% FCS                                             |  |
| 2 eggs discarded;20% % 50% FCS                           |  |
| cumulus v. sticky, eggs adhered together - check new BSA |  |
| F10, F12; eggs all stuck together - check new BSA        |  |
|                                                          |  |
|                                                          |  |
|                                                          |  |
|                                                          |  |

|  |  |       |                                |  |       |                                                                            |  |  |  |  |  |  |  |
|--|--|-------|--------------------------------|--|-------|----------------------------------------------------------------------------|--|--|--|--|--|--|--|
|  |  | *list | <b>64 Procedures</b>           |  |       |                                                                            |  |  |  |  |  |  |  |
|  |  | only  |                                |  |       | <b>62 LORs</b>                                                             |  |  |  |  |  |  |  |
|  |  |       | <b>59 outcomes</b>             |  |       | <b>1 Laparotomy</b>                                                        |  |  |  |  |  |  |  |
|  |  |       | 519 follicles                  |  |       | <b>1 vasectomy x 21</b>                                                    |  |  |  |  |  |  |  |
|  |  |       | 274 eggs                       |  |       | <b>3 Intratubal inseminations</b>                                          |  |  |  |  |  |  |  |
|  |  |       | 4 No eggs recovered            |  |       |                                                                            |  |  |  |  |  |  |  |
|  |  |       | 51 inseminations               |  |       |                                                                            |  |  |  |  |  |  |  |
|  |  |       | 25 with embryos recorded       |  |       |                                                                            |  |  |  |  |  |  |  |
|  |  |       | <b>1st embryos</b>             |  |       |                                                                            |  |  |  |  |  |  |  |
|  |  |       | <b>2x Insem eggs to rabbit</b> |  |       |                                                                            |  |  |  |  |  |  |  |
|  |  |       | <b>1st blastocyst</b>          |  |       |                                                                            |  |  |  |  |  |  |  |
|  |  |       |                                |  |       |                                                                            |  |  |  |  |  |  |  |
|  |  |       |                                |  |       | <b>Media changes</b>                                                       |  |  |  |  |  |  |  |
|  |  |       |                                |  | Feb   | lactate, bicarb                                                            |  |  |  |  |  |  |  |
|  |  |       |                                |  | May   | red. NaCl, red. O2                                                         |  |  |  |  |  |  |  |
|  |  |       |                                |  | June  | F10, Whitten's, Whittingham, Bavister, David's augmented, 10-20%FCS,5% CO2 |  |  |  |  |  |  |  |
|  |  |       |                                |  | Aug   | 20% HS                                                                     |  |  |  |  |  |  |  |
|  |  |       |                                |  | Dec   | reduced O2                                                                 |  |  |  |  |  |  |  |
|  |  |       |                                |  | April | ? Morula                                                                   |  |  |  |  |  |  |  |
|  |  |       |                                |  | Aug   | Blastocysts                                                                |  |  |  |  |  |  |  |
|  |  |       |                                |  |       |                                                                            |  |  |  |  |  |  |  |
|  |  |       |                                |  |       |                                                                            |  |  |  |  |  |  |  |

| A         | B  | C     | D             | E          | F              | G          | H         | I         | J    | K                    | L        | M       | N     | O    | P        |
|-----------|----|-------|---------------|------------|----------------|------------|-----------|-----------|------|----------------------|----------|---------|-------|------|----------|
| Book      | FF | Notes | Churchill     | No         | P-Code         | L no.      | Age       | Stim      | hCG  | Lap Date             | comment  | hCG-OCR | Folls | Eggs | hCG-ins. |
| none      |    | x     |               | 125        | 80             | 296778     | 28        | NR        | NR   | 07/01/1971           | No data  |         |       |      |          |
| L2/H1     | x  | x     |               | 126        | 81             | 261        | 39        | P3x3      | 5000 | 04/01/1971           | SD-F-H   | 33      | 9     | 4    | 34.25    |
| L2/H1     | x  | x     | Folder 19     | 127        | 50 (2)         | 262        | 39        | P4x3      | 5000 | 07/01/1971           | SD-F-H/D | 32.5    | 10    | 3    |          |
| L2/H1     | x  | x     |               | 128        | 63 (2)         | 263        | 36        | P4x3      | 5000 | 07/01/1971           | SD-F-H   | 33.25   | 3     | 1    |          |
| L2/H1     | x  | x     |               | 129        | 82 (1)         | 264        | 26        | P4x3      | 5000 | 21/01/1971           | SD-F-H   | 32.5    | 9     | 8    | 33.5     |
| L2/H1     | x  | x     | Folder 19     | 130        | 69 (2)         | 265        | 33        | P4x3      | 5000 | 25/01/1971           | SD-F-H   | 33.25   | 15    | 6    |          |
| L2/H1     | x  | x     |               | 131        | 83             | 266        | 35        | P4x3      | 5000 | 01/02/1971           | SD-F-H   |         | 5     | 0    |          |
| L2/H1     | x  | x     |               | 132        | 84             | 267        | 33        | P4x3      | 5000 | 01/02/1971           | SD-F-H   |         | 9     | 6    |          |
| L2/H1     | x  | x     | Folder 11, EB | 133        | 73 (2)         | 268        | 26        | P4x3      | 5000 | 12/03/1971           | SD-F-H   | 32.5    | 10    | 6    |          |
| L2/H1     | x  | x     | Folder 19     | 134        | 71 (2)         | 269        | 33        | P4x3      | 5000 | 11/03/1971           | SD-F-H   | 32.5    | 14    | 7    |          |
| L2/H1     | x  | x     | Folder 19     | 135        | 85 (1)         | 270        | 26        | P4x3      | 5000 | 15/03/1971           | SD-F-PCS |         | 16    | 12   |          |
| L2/H1     | x  | x     | Folder 19     | 136        | 70 (2)         | 271        | 28        | P3x3      | 5000 | 19/03/1971           |          |         | 4     | 0    |          |
| L2/H1     | x  | x     |               | 137        | 86             | 272        | 27        | P4x3      | 5000 | 19/03/1971           | SD-F-H   |         | 5     | 6    |          |
| L2/H1     | x  | x     |               | 138        | 87             | 273        | 21        | P4x3      | 5000 | 19/04/1971           | SD-F-H   |         | 12    | 6    |          |
| L2/H1     | x  | x     | Folder 19     | 139        | 72 (2)         | 274        | 33        | NR        |      | 19/04/1971           | SD-F-H   |         | 12    | 5    |          |
| L5        | x  | x     |               | 140        | 88             | 275        | 31        | NR        |      | 19/04/1971           | SD-F-H   |         | 4     | 1    |          |
| L2/H1     | x  | x     |               | 141        | 79 (2)         | 276        | 28        | NR        |      | 22/04/1971           |          |         | 4     | 0    |          |
| L2/H1     | x  | x     |               | 142        | 89             | 277        | 30        | P4x3      | 5000 | 10/05/1971           | SD-F-D   | 32.5    | 6     | 4    |          |
| L2/H1     | x  | x     |               | 143        | 90             | 278        | 28        | P4x3      | 5000 | 10/05/1971           | SD-F-H   | 33.75   | 9     | 9    |          |
| L2/H1     | x  | x     |               | 144        | 91             | 279        | 35        | P4x3      | 5000 | 13/05/1971           | SD-F-H   | 33      | 14    | 7    |          |
| L2/H1     | x  | x     |               | 145        | 34 (3)         | 280        | 26        | P4x3      | 5000 | 13/05/1971           | SD-F-H   | 33.25   | 7     | 5    |          |
| L2/H1     | x  | x     | Folder 19     | 146        | 92 (1)         | 281        | 33        | P4x3      | 5000 | 16/06/1971           | SD-F-H   | 33.25   | 9     | 1    |          |
| L2/H1     | x  | x     |               | 147        | 93             | 282        | 24        | P4x3      | 5000 | 28/06/1971           | SD-F-H/D | 33      | 16    | 6    | 36       |
| L2/H1     | x  | x     |               | 148        | 94 (1)         | 283        | 27        | P4x3      | 5000 | 06/07/1971           | H        |         | 8     | 5    |          |
| L2/H1     | x  | x     |               | 149        | 95             | 284        | 36        | P4x3      | 5000 | 06/07/1971           | H        |         | 3     | 2    |          |
| L2/H1     | x  | x     | Folder 19     | 150        | 96 (1)         | 285        | 28        | P4x3      | 5000 | 08/07/1971           | H        |         | 11    | 3    |          |
| L2/H1     | x  | x     |               | 151        | 97             | 286        | 32        | P4x3      | 5000 | 12/07/1971           | H        | 32.75   | 11    | 6    | 35       |
| L2/H1     | x  | x     |               | 152        | 98 (1)         | 287        | 25        | P4x3      | 5000 | 26/07/1971           | H        | 33      | 12    | 1    | 36       |
| L2/H1     | x  | x     |               | 153        | 99 (1)         | 288        | 34        | P4x3      | 5000 | 26/07/1971           | H        |         | 14    | 7    |          |
| L2/H1     | x  | x     | Folder 19     | 154        | 51 (2)         | 289        | 30        | P4x3      | 5000 | 26/07/1971           | H        |         | 8     | 4    |          |
| <b>H3</b> |    |       |               | <b>155</b> | <b>100 (1)</b> | <b>290</b> | <b>NR</b> | <b>NC</b> |      | <b>no date ? Aug</b> |          |         |       |      |          |
| <b>H3</b> |    |       |               | <b>156</b> | <b>101</b>     | <b>291</b> | <b>NR</b> | <b>NC</b> |      | <b>no date ? Aug</b> |          |         |       |      |          |



| Q                                                                         | R      | S                                               |
|---------------------------------------------------------------------------|--------|-------------------------------------------------|
| Outcome                                                                   | ET no. | comments/Media                                  |
| No data                                                                   |        | No data                                         |
| 8-16c, degen. 2-3c                                                        |        | Red. O2; new TyrB, F10, F12, 20%FCS             |
| 6-8c, fixed                                                               |        | Red. O2; F12, 20%FCS                            |
| abnormal cleavage - fixed                                                 |        | Red. O2; F12 20% FCS                            |
| All unfert                                                                |        | Red O2;F101:4, then neat + 20%FCS/F12 20%       |
| 5 all failed to cleave; fixed in ac methanol 2/2/71                       |        |                                                 |
| areas of endometriosis; poor resp, looks menopausal                       |        |                                                 |
| 1? Early blasto? Ca.70 cells fixed - degenerating                         |        | F10 +20%FCS + 20% own serum                     |
| no fert                                                                   |        | F10 +20% FCS                                    |
| all 1c, degenerated                                                       |        | F10/F12 + 20% FCS                               |
| 21/3 - 4 blastocysts, fixed - rest GVs or 1-c; steroids measured in drops |        | F10 +20% FCS or human serum; GC counts          |
| no eggs                                                                   |        |                                                 |
| inseminated - no further details                                          |        |                                                 |
| 1-c, 1PB - all stained                                                    |        | F10 + 20% FCS, in stages                        |
| 1x8c beauty:23/4 - colcemid, fixed: 16-18 nuclei                          |        | F10 + 20% FCS, in stages                        |
| brown/misshapen, can't see PN - egg did not cleave                        |        | F10 + 20% FCS, in stages                        |
| no eggs                                                                   |        |                                                 |
| 16-32c, stripy morula - fixed                                             |        | sperm from 278 & another D; 10% mat serum       |
| 16-32c; early blasto; fixed - at least one Y body-photo                   |        | 10% mat serum added                             |
| early blasto: 21 nuclei, 13-14 mitoses; 3x4c;no Y fluoresc.               |        | 20% mat serum added                             |
| nice eggs; all 1-c                                                        |        | 10% mat serum added                             |
| 1 GV;collect eggs at 31 hr next time; check steroids in urine             |        | 5% CO2 in air                                   |
| 1x 8-16c (D5) fixed                                                       |        | no fert with H sperm                            |
| Infected - no cleavage                                                    |        | F10, 20% FCS, 5% Mat serum;5/5/90, 5%Co2 in air |
| Infected                                                                  |        | F10, 20% FCS, 5% Mat serum; 5%Co2 in air/5/5/90 |
| All 1-c                                                                   |        | F10, 20% FCS+ Pen & Strep                       |
| no cleavage                                                               |        | 3 in 5%CO2 in air, 3 in 5:5:90 O2/Co2/N2        |
| 1-C ? Overinseminated?                                                    |        | F10 + 0.5% BSA Reduced O2                       |
| All 1-c                                                                   |        | F10/20% new FCS/5% maternal serum               |
| 1c, 6-8c                                                                  |        | 1 in 5%CO2 in air, 1 in 5:5:90 O2/Co2/N2        |
|                                                                           |        |                                                 |
|                                                                           |        |                                                 |

|                                                        |  |                                       |
|--------------------------------------------------------|--|---------------------------------------|
| "poached egg", 1-c                                     |  | 5/5/90;                               |
|                                                        |  |                                       |
| no eggs                                                |  |                                       |
| 1-c; fixed : 1PB                                       |  | 5/5/90, F10/20%FCS/5%HS (inactivated) |
| all 1-c , I misshapen                                  |  |                                       |
| RG thinks may be infected, all 1-c                     |  |                                       |
| all 1-c                                                |  |                                       |
| all 1-c                                                |  |                                       |
| all 1-c                                                |  |                                       |
| <b>girl with 25-day cycle, lap d12</b>                 |  |                                       |
| 1 ?Pn? 10/12, 4-6c - have seen better!                 |  |                                       |
| <b>16c FIRST TRANSFER, Dec 12 10.45 80hrs post OCR</b> |  | <b>1 F10/FCS 20% + 5% mat serum</b>   |
| ?PN ?GV?                                               |  |                                       |
|                                                        |  |                                       |
|                                                        |  |                                       |
|                                                        |  |                                       |
|                                                        |  |                                       |
|                                                        |  |                                       |
|                                                        |  |                                       |
|                                                        |  |                                       |
|                                                        |  |                                       |
|                                                        |  |                                       |
|                                                        |  |                                       |
|                                                        |  |                                       |
|                                                        |  |                                       |
|                                                        |  |                                       |
|                                                        |  |                                       |
|                                                        |  |                                       |
|                                                        |  |                                       |
|                                                        |  |                                       |
|                                                        |  |                                       |
|                                                        |  |                                       |
|                                                        |  |                                       |
|                                                        |  |                                       |
|                                                        |  |                                       |
|                                                        |  |                                       |



| T                   | U                                                          | V | W | X | Z |
|---------------------|------------------------------------------------------------|---|---|---|---|
| <b>Monitoring</b>   | <b>Comments</b>                                            |   |   |   |   |
| TE x 4 or 5, PD x 1 |                                                            |   |   |   |   |
|                     |                                                            |   |   |   |   |
|                     | 25% F10 added Tyrode B 296 - F10/F12 299                   |   |   |   |   |
|                     |                                                            |   |   |   |   |
|                     |                                                            |   |   |   |   |
|                     | 2 blastocyst fluids + carrier F10 medium + granulosa cells |   |   |   |   |
|                     |                                                            |   |   |   |   |
|                     |                                                            |   |   |   |   |
|                     |                                                            |   |   |   |   |
|                     |                                                            |   |   |   |   |
|                     |                                                            |   |   |   |   |
|                     | 30hrs - blasto (4/7/71)                                    |   |   |   |   |
|                     |                                                            |   |   |   |   |
|                     | <b>Blood Group A</b>                                       |   |   |   |   |
|                     | <b>Blood Group A</b>                                       |   |   |   |   |
|                     | <b>Blood Group O</b>                                       |   |   |   |   |
|                     |                                                            |   |   |   |   |

| A            | B        | C        | D                | E          | F              | G          | H         | I           | J           | K                 | L | M            | N        | O        | P       |
|--------------|----------|----------|------------------|------------|----------------|------------|-----------|-------------|-------------|-------------------|---|--------------|----------|----------|---------|
| Book         | FF       | Notes    | Churchill        | No.        | P-Code         | L No.      | Age       | Stim        | hCG         | Lap Date          |   | hCG-OCR      | folls    | eggs     | hCG-ins |
| L3/H2        | x        | x        | Folder 19        | 171        | 96 (2)         | 305        | 29        | P4x3        | 5000        | 01/01/1972        |   | 32.25        | 6        | 4        | 34      |
| L3/H2        | x        | x        | Folder 19        | 172        | 51 (3)         | 306        | 34        | P4x3        | 5000        | 01/01/1972        |   | 32           | 8        | 5        | 33      |
| L3/H2        | x        | x        | Folder 19        | 173        | 50 (4)         | 307        | 40        | P4x3        | 5000        | 03/01/1972        |   | 32.25        | 14       | 7        | 33.5    |
| L3/H2        |          | x        | Folder 19        | 174        | 108            | 308        | 36        | P4x3        | 5000        | 03/01/1972        |   | 32.25        | 8        | 1        | 33.5    |
| L3/H2        | x        | x        | Folder 19        | 175        | 37 (4)         | 309        | 36        | P4x3        | 5000        | 15/01/1972        |   | 33           | 10       | 2        | 34      |
| L3/H2        | x        | x        | Folder 19        | 176        | 39 (3)         | 310        | 37        | P4x3        | 5000        | 15/01/1972        |   | 32.5         | 8        | 3        | 33.5    |
| L3/H2        | x        | x        |                  | 177        | 21 (4)         | 311        | 38        | P4x3        | 5000        | 15/01/1972        |   | 32.25        | 11       | 10       | 33.5    |
| L3/H2        | x        | x        | Folder 19        | 178        | 109            | 312        | 25        | P4x3        | 5000        | 05/01/1900        |   | 33.25        | 6        | 3        | 33.5    |
| L3/H2        | x        | x        | Folder 19        | 179        | 52 (6)         | 313        | 28        | P4x3        | 5000        | 17/01/1972        |   | 33           | 8        | 4        | 33.5    |
| L3/H2        | x        | x        | Folder 19        | 180        | 110            | 314        | 29        | P4x3        | 5000        | 17/01/1972        |   | 33.5         | 12       | 8        | 34.5    |
| L3/H2        | x        | x        | Folder 19        | 181        | 92 (2)         | 315        | 35        | P5x3        | 5000        | 19/01/1972        |   | 32.75        | 19       | 10       |         |
| L3/H2        | x        | x        | Folder 19        | 182        | 9 (5)          | 316        | 37        | P4x3        | 5000        | 20/01/1972        |   |              | 9        | 5        |         |
| L3/H2        | x        | x        | Folder 19        | 183        | 111            | 317        | 30        | P5x3        | 5000        | 01/02/1972        |   | 32.25        | 6        | 4        | 33.5    |
| L3/H2        | x        | x        |                  | 184        | 99 (2)         | 318        | 35        | P5x3        | 5000        | 01/02/1972        |   | 32.5         | 18       | 9        | 34.5    |
| L3/H2        | x        | x        | Folder 19        | 185        | 68 (2)         | 319        | NR        | NR          |             | 15/02/1971        |   |              | 10       | 1        |         |
| L5           | x        | x        | Folder 19        | 186        | 112            | 320        | NR        | NR          |             | 15/02/1972        |   |              | 11       | 2        |         |
| L3/H2        | x        | x        | Folder 19        | 187        | 85 (2)         | 321        | 26        | P4x3        | 5000        | 16/03/1972        |   |              | 13       | 11       |         |
| L3/H2        | x        | x        | Folder 19        | 188        | 69 (3)         | 322        | 33        | P4x3        | 5000        | 16/03/1972        |   | 31.75        | 10       | 7        |         |
| L3/H2        | x        | x        | Folder 19        | 189        | 57 (3)         | 323        | 25        | P4x3        | 5000        | 16/03/1972        |   | 31.5         | 5        | 2        | 32      |
| L3/H2        | x        | x        | Folder 19        | 190        | 71 (3)         | 324        | 34        | P4x3        | 5000        | 23/03/1972        |   | 31.5         | 12       | 3        |         |
| L3/H2        | x        | x        | Folder 19        | 191        | 42 (4)         | 325        | 24        | P3x4        | 5000        | 23/03/1972        |   | 31.5         | 10       | 4        |         |
| L3/H2        | x        | x        | Folder 19        | 192        | 113            | 326        | 35        | P3x4        | 5000        | 23/03/1972        |   | 31.5         | 3        | 2        | 32      |
| <b>L3/H2</b> | <b>x</b> | <b>x</b> | <b>Folder 19</b> | <b>193</b> | <b>114 (1)</b> | <b>327</b> | <b>34</b> | <b>P3x4</b> | <b>5000</b> | <b>26/04/1972</b> |   | <b>31.75</b> | <b>7</b> | <b>4</b> |         |
| L3/H2        | x        | x        | Folder 19        | 194        | 115            | 328        | 35        | P3x4        | 5000        | 26/04/1972        |   | 31.5         | 7        | 2        | 33.25   |
| L3/H2        | x        | x        |                  | 195        | 116            | 329        | 34        | P3x4        | 5000        | 01/05/1972        |   | 31.5         | 15       | 8        | 32.5    |
| L3/H2        | x        | x        | Folder 19        | 196        | 28 (4)         | 330        | 38        | P3x4        | 5000        | 01/05/1972        |   | 31.5         | 10       | 5        | 32.25   |
| L3/H2        | x        | x        | Folder 19        | 197        | 66 (2)         | 331        | 36        | P4x3        | 5000        | 01/05/1972        |   |              | 0        | 0        |         |
| L3/H2        | x        | x        | Folder 19        | 198        | 117            | 332        | 35        | P4x3        | 5000        | 13/05/1972        |   | 31.5         | 7        | 2        | 33      |
| L3/H2        | x        | x        | Folder 19        | 199        | 4 (3)          | 333        | 30        | P4x3        | 5000        | 13/05/1972        |   | 31.5         | 7        | 3        | 32.25   |
| L3/H2        | x        | x        | Folder 19        | 200        | 54 (2)         | 334        | 28        | P3 x4       | 5000        | 21/05/1972        |   | 31.5         | 15       | 3        | 33.5    |
| L3/H2        | x        | x        | Folder 19        | 201        | 46 (3)         | 335        | 34        | P3 x4       | 5000        | 21/05/1972        |   | 31.5         | 9        | 7        | 32.5    |
| <b>L3/H2</b> | <b>x</b> | <b>x</b> | <b>Folder 19</b> | <b>202</b> | <b>73 (2)</b>  | <b>336</b> | <b>27</b> | <b>NR</b>   |             | <b>27/06/1972</b> |   |              | <b>x</b> | <b>0</b> |         |



| <b>Q</b>                                                 | <b>R</b>      | <b>S</b>                                                   |
|----------------------------------------------------------|---------------|------------------------------------------------------------|
| <b>Outcome</b>                                           | <b>ET No.</b> | <b>Media/comments</b>                                      |
| all 1-c                                                  |               | Tyr Hep/BSA, F10/20% FCS/5% HS + Glut                      |
| MII 1PB                                                  |               |                                                            |
| 2c, 8c, 8c+ - cells fusing, can't score (ET)             | 2             | F10/20%FCS/5%MS                                            |
| 1c - think GV                                            |               |                                                            |
| 1-c                                                      |               |                                                            |
| MII, GV, 1-c                                             |               |                                                            |
| can't score - eggs in C <sup>+++</sup>                   |               |                                                            |
| 1-c no cleavage                                          |               |                                                            |
| 1x fragmenting 4c; rest 1-c                              |               |                                                            |
| 1x morula/16c; rest 1-c, fragmenting                     |               |                                                            |
| GVs, 1x MII, no cleavage                                 |               |                                                            |
| all 1-c                                                  |               |                                                            |
| 1-c                                                      |               |                                                            |
| GV, 1-c 1PB                                              |               |                                                            |
| discontinued                                             |               |                                                            |
| nothing recorded                                         |               |                                                            |
| 1x16c on 20/3 (ET) rest 1-c                              | 3             |                                                            |
| 2xGV, 1x1c, 1 abnormal 4c                                |               |                                                            |
| 20th: elongated 16c - nice cells (ET)                    | 4             | 2)Sperm in ZP,1/3 through zona 1 PB 3) 2 sp v deep in zona |
| 2x16c (ET)                                               | 5             | sperm washed Tyr B, resusp at 5x10 <sup>6</sup>            |
| 3c, degen. ?overinseminated? ?MII x1, 1PB x2             |               |                                                            |
| GV, ?MII, chromosomes degenerate                         |               |                                                            |
| <b>1x6-8c, 1x early blasto - fixed D5</b>                | <b>GIFT</b>   | <b>sperm + egg to oviduct</b>                              |
| nothing recorded                                         |               |                                                            |
| 1x2Pn,MII 2PN x5, 2xGV (fixed) eggs in higher pH Tyr7.35 |               |                                                            |
| GVx2,MII1PB, 1 syngamy (fixed)                           |               |                                                            |
| no follicles                                             |               |                                                            |
| GV, 1x sp halfway through zona - 1PB 1N                  |               |                                                            |
| 3x1-c                                                    |               |                                                            |
| 3x1c; GVx2, 1MII1PB                                      |               |                                                            |
| all 1-c Stain: 2MII 1PB, 1GV, 1 degen.w/PVS sperm        |               |                                                            |
| <b>pneumoperitoneum not achieved</b>                     |               |                                                            |



| <b>T</b>            | <b>U</b>                         | <b>V</b> | <b>W</b>   | <b>X</b> | <b>Z</b> |
|---------------------|----------------------------------|----------|------------|----------|----------|
| <b>Monitoring</b>   | <b>Comments</b>                  |          | <b>RTM</b> |          |          |
| TE x 4 or 5, PD x 1 |                                  |          | RTM D 20   |          |          |
|                     |                                  |          | RTM D23    |          |          |
|                     | ?2nd transfer? (crossed out)     |          |            |          |          |
|                     |                                  |          |            |          |          |
|                     |                                  |          |            |          |          |
|                     |                                  |          |            |          |          |
|                     |                                  |          |            |          |          |
|                     |                                  |          |            |          |          |
|                     |                                  |          |            |          |          |
|                     |                                  |          |            |          |          |
|                     |                                  |          | 27 d       |          |          |
|                     |                                  |          | 56 d ?     |          |          |
| Daily 24 hr urines  |                                  |          | 39 d ?     |          |          |
|                     |                                  |          |            |          |          |
|                     | <b>Blood groups - both O pos</b> |          |            |          |          |
|                     | Bld Grp: A Rh+, O Rh neg         |          |            |          |          |
|                     | H: A +                           |          |            |          |          |
|                     | H O+, W A+                       |          |            |          |          |
|                     | H A+                             |          |            |          |          |
|                     |                                  |          |            |          |          |
|                     |                                  |          |            |          |          |
|                     | Both B +                         |          |            |          |          |
|                     | H A +, W O +                     |          |            |          |          |
|                     | <b>A+</b>                        |          |            |          |          |



| A            | B        | C        | D                | E          | F              | G          | H         | I                     | J           | K                 | L | M            | N        | O        | P         |
|--------------|----------|----------|------------------|------------|----------------|------------|-----------|-----------------------|-------------|-------------------|---|--------------|----------|----------|-----------|
| Book         | FF       | Notes    | Churchill        | No.        | P-Code         | L-No       | Age       | Stim                  | hCG         | Lap Date          |   | hCG-OCR      | folls    | eggs     | insem.    |
| L4/H2        | x        | x        | Folder 19        | 212        | 122            | 346        | 27        | P3 x 4                | 5000        | 03/01/1973        |   |              | 8        | 3        |           |
| L4/H2        | x        | x        | Folder 19        | 213        | 123            | 347        | 39        | P3 x 4                | 5000        | 03/01/1973        |   | 33.5         | 6        | 1        |           |
| L4/H2        | x        | x        | Folder 19        | 214        | 124            | 348        | 28        | P3 x 4                | 8000        | 11/01/1973        |   | 32           | 8        | 6        | 34        |
| <b>L4/H2</b> | <b>x</b> |          | <b>Folder 19</b> | <b>215</b> | <b>54 (3)</b>  | <b>349</b> | <b>29</b> | <b>P3 x 4</b>         | <b>8000</b> | <b>12/01/1973</b> |   | <b>37.25</b> |          | <b>0</b> | <b>X</b>  |
| <b>L4/H2</b> | <b>x</b> |          | <b>Folder 19</b> | <b>216</b> | <b>38 (3)</b>  | <b>350</b> | <b>32</b> | <b>P3 x 4</b>         | <b>8000</b> | <b>12/01/1973</b> |   | <b>37.75</b> | <b>3</b> | <b>1</b> | <b>X</b>  |
| <b>L4/H2</b> | <b>x</b> | <b>x</b> | <b>Folder 19</b> | <b>217</b> | <b>125 (1)</b> | <b>351</b> | <b>28</b> | <b>Cl 50mg BD x 5</b> | <b>8000</b> | <b>30/01/1973</b> |   | <b>38</b>    | <b>2</b> | <b>2</b> | <b>39</b> |
| <b>L4/H2</b> | <b>x</b> |          | <b>Folder 19</b> | <b>218</b> | <b>114 (2)</b> | <b>352</b> | <b>34</b> | <b>Cl 50mg BD x 5</b> | <b>8000</b> | <b>30/01/1973</b> |   | <b>38.5</b>  | <b>1</b> | <b>1</b> | <b>X</b>  |
| <b>L4/H2</b> | <b>x</b> |          | <b>Folder 19</b> | <b>219</b> | <b>110 (3)</b> | <b>353</b> | <b>30</b> | <b>Cl 50mg BD x 5</b> | <b>8000</b> | <b>01/02/1973</b> |   | <b>37.5</b>  | <b>2</b> | <b>1</b> | <b>X</b>  |
| <b>L4/H2</b> | <b>x</b> |          | <b>Folder 19</b> | <b>220</b> | <b>126</b>     | <b>354</b> | <b>30</b> | <b>P3 x 4</b>         | <b>8000</b> | <b>01/02/1973</b> |   | <b>38</b>    | <b>3</b> | <b>1</b> | <b>X</b>  |
| L4/H2        | x        |          | Folder 19        | 221        | <b>44 (5)</b>  | 355        | 36        | P3 x 4                | 8000        | 20/02/1973        |   | 36           | 6        | 4        | 36.5      |
| L4/H2        | x        | x        | Folder 19        | 222        | 85 (3)         | 356        | 27        | P3 x 4                | 8000        | 20/02/1973        |   | 36           | 10       | 5        | immed     |
| <b>L4/H2</b> | <b>x</b> |          | <b>Folder 19</b> | <b>223</b> | <b>121 (1)</b> | <b>357</b> | <b>32</b> | <b>Clomiphene</b>     | <b>8000</b> | <b>08/03/1973</b> |   | <b>40</b>    | <b>3</b> | <b>0</b> |           |
| <b>L4/H2</b> | <b>x</b> | <b>x</b> | <b>Folder 19</b> | <b>224</b> | <b>127</b>     | <b>358</b> | <b>NR</b> | <b>Clomiphene</b>     | <b>8000</b> | <b>08/03/1973</b> |   | <b>40.25</b> | <b>4</b> | <b>0</b> |           |
| L4/H2        | x        | x        | Folder 19        | 225        | 92 (3)         | 359        | 36        | Clomiphene            | 10000       | 02/04/1973        |   | 36.5         | 13       | 4        | immed     |
| L4/H2        | x        | x        | Folder 19        | 226        | 70 (3)         | 360        | 31        | Clomiphene            | 10000       | 02/04/1973        |   | 37           | 5        | 3        | immed     |
| <b>L5</b>    | <b>x</b> |          | <b>Folder 19</b> | <b>227</b> | <b>114 (3)</b> | <b>361</b> | <b>33</b> | <b>Clomiphene</b>     | <b>5000</b> | <b>x</b>          |   |              |          |          |           |
| <b>L4/H2</b> | <b>x</b> |          |                  | <b>228</b> | <b>128</b>     | <b>362</b> | <b>NR</b> | <b>Clomiphene</b>     | <b>8000</b> | <b>x</b>          |   |              |          |          |           |
| <b>L4/H2</b> | <b>x</b> |          | <b>Folder 19</b> | <b>229</b> | <b>110 (4)</b> | <b>363</b> | <b>NR</b> | <b>Clomiphene</b>     | <b>8000</b> | <b>x</b>          |   |              |          |          |           |
| <b>L4/H2</b> | <b>x</b> |          | <b>Folder 19</b> | <b>230</b> | <b>129</b>     | <b>364</b> | <b>NR</b> | <b>Clomiphene</b>     | <b>8000</b> | <b>x</b>          |   |              |          |          |           |
| <b>L4/H2</b> | <b>x</b> |          | <b>Folder 19</b> | <b>231</b> | <b>120 (2)</b> | <b>365</b> | <b>25</b> | <b>Clomiphene</b>     | <b>8000</b> | <b>x</b>          |   |              |          |          |           |
| <b>L4/H2</b> | <b>x</b> |          | <b>Folder 19</b> | <b>232</b> | <b>130 (1)</b> | <b>366</b> | <b>33</b> | <b>Clomiphene</b>     | <b>5000</b> | <b>x</b>          |   |              |          |          |           |
| L4/H3        | x        |          | Folder 19        | 233        | 131 (1)        | 367        | 27        | Clomiphene            | 8000        | 31/05/1973        |   | 36.8.        | 10       | 2        | 37.5      |
| <b>L4/H3</b> | <b>x</b> |          | <b>Folder 19</b> | <b>234</b> | <b>121 (2)</b> | <b>368</b> | <b>NR</b> | <b>Clomiphene</b>     | <b>8000</b> | <b>31/05/1973</b> |   |              | <b>4</b> | <b>0</b> | <b>X</b>  |
| L4/H3        | x        |          | Folder 19        | 235        | 92 (4)         | 369        | 36        | Clomiphene            | 8000        | 31/05/1973        |   | 34           | 13       | 5        | 34.5      |
| L4/H3        | x        | x        | Folder 19        | 236        | 82 (2)         | 370        | 28        | P4/2 x 4              | 8000        | 12/06/1973        |   | 36.5         | 10       | 7        | 37.5      |
| <b>L4/H3</b> | <b>x</b> |          | <b>Folder 19</b> | <b>237</b> | <b>125 (2)</b> | <b>371</b> | <b>35</b> | <b>Cl/Pregnyl</b>     | <b>8000</b> | <b>12/06/1973</b> |   |              | <b>2</b> | <b>0</b> | <b>X</b>  |
| <b>L4/H3</b> | <b>x</b> |          | <b>Folder 19</b> | <b>238</b> | <b>20 (3)</b>  | <b>372</b> | <b>32</b> | <b>?Pergonal</b>      | <b>8000</b> | <b>14/06/1973</b> |   |              | <b>1</b> | <b>0</b> | <b>X</b>  |
| L4/H3        | x        | x        | Folder 19        | 239        | 132            | 373        | 29        | P3 x 4                | 8000        | 20/07/1973        |   | 34.75        | 8        | 8        | 35.5      |
| L4/H3        | x        |          | Folder 19        | 240        | 133            | 374        | 25        | P3 x 4                | 8000        | 20/07/1973        |   | 35           | 1        | 1        | ?         |
| L4/H3        | x        | x        | Folder 19        | 241        | 134            | 375        | NR        | P3 x 4                | 8000        | 21/07/1973        |   | 34.25        | 14       | 8        |           |
| L4/H3        | x        | x        | Folder 19        | 242        | 135            | 376        | 35        | P3 x 4                | 8000        | 21/07/1973        |   | 34.5         | 4        | 4        | 35        |
| L4/H3        | x        | x        | Folder 19        | 243        | 136            | 377        | 32        | P2 x 4,               | 8000        | 25/07/1973        |   | 34.5         | 6        | 4        | 35        |



|              |          |          |                          |            |                |                               |           |                          |               |                   |  |              |            |            |          |
|--------------|----------|----------|--------------------------|------------|----------------|-------------------------------|-----------|--------------------------|---------------|-------------------|--|--------------|------------|------------|----------|
| L4/H3        | x        | x        | Folder 19                | 244        | 137 (1)        | 378                           | 38        | P2 x 4,                  | 8000          | 25/07/1973        |  | 34.75        | 7          | 3          | 35.5     |
| L4/H3        | x        | x        | Folder 19                | 245        | 138            | 379                           | 30        | P3 x 4                   | 8000          | 08/08/1973        |  | 34.5         | 5          | 1          | 35       |
| L4/H3        | x        | x        | Folder 19                | 246        | 38 (4)         | 380                           | 33        | NC+Pregnyl               | 5000          | 06/12/1973        |  | 34.5         | 5          | 2          | 35       |
| <b>L4/H3</b> | <b>x</b> |          | <b>Folder 19</b>         | <b>247</b> | <b>125 (3)</b> | <b>381</b>                    | <b>28</b> | <b>NC+Pregnyl</b>        | <b>5000</b>   | <b>06/12/1973</b> |  | <b>40.5</b>  |            | <b>0 X</b> |          |
| L4/H3        | x        | x        | Folder 19                | 248        | 139            | 382                           |           | NC+Pregnyl               | 5000          | 07/12/1973        |  | 34.25        | 1          | 1          | X        |
| <b>L4/H3</b> | <b>x</b> | <b>x</b> | <b>Folder 19</b>         | <b>249</b> | <b>110 (5)</b> | <b>383</b>                    | <b>30</b> | <b>NC+Pregnyl</b>        | <b>5000</b>   | <b>07/12/1973</b> |  | <b>40.25</b> |            | <b>0 X</b> |          |
| L4/H3        | x        | x        | Folder 19                | 250        | 140            | 384                           | NR        | P3x4                     | 5000          | 09/12/1973        |  | 34.25        | 9          | 4          | 35       |
| <b>L4/H3</b> | <b>x</b> |          | <b>Folder 19</b>         | <b>251</b> | <b>141 (1)</b> | <b>385</b>                    | <b>28</b> | <b>NC+Pregnyl</b>        | <b>5000</b>   | <b>09/12/1973</b> |  | <b>40.75</b> |            | <b>0 X</b> |          |
| <b>L4</b>    | <b>x</b> |          |                          | <b>252</b> | <b>142</b>     | <b>386</b>                    |           | <b>Semen+bld samples</b> | <b>NO LAP</b> |                   |  |              | <b>x</b>   | <b>x</b>   | <b>X</b> |
| L4/H3        | x        | x        | Folder 19                | 253        | 137 (2)        | 387                           | 38        | NC+Pregnyl               | 5000          | 13/12/1973        |  | 34.25        | 5          | 4          | 35       |
| <b>L4/H3</b> | <b>x</b> | <b>x</b> | <b>Folder 19</b>         | <b>254</b> | <b>114 (4)</b> | <b>388</b>                    | <b>33</b> | <b>NC+Pregnyl</b>        | <b>5000</b>   | <b>13/12/1973</b> |  | <b>35.5</b>  | <b>5</b>   | <b>0 X</b> |          |
| <b>L4/H3</b> | <b>x</b> | <b>x</b> | <b>Folder 19</b>         | <b>255</b> | <b>143</b>     | <b>389</b>                    | <b>NR</b> | <b>NC+Pregnyl</b>        | <b>5000</b>   | <b>19/12/1973</b> |  | <b>40.5</b>  |            | <b>0 X</b> |          |
| <b>L4/H3</b> | <b>x</b> | <b>x</b> |                          | <b>256</b> | <b>144 (1)</b> | <b>390</b>                    | <b>28</b> | <b>NC+Pregnyl</b>        | <b>5000</b>   | <b>19/12/1973</b> |  | <b>41</b>    | <b>2</b>   | <b>0 X</b> |          |
|              |          |          |                          |            |                |                               |           |                          |               | <b>38 lap</b>     |  |              | <b>186</b> | <b>86</b>  |          |
|              |          |          | <b>X: paper towel</b>    |            |                |                               |           |                          |               |                   |  |              |            |            |          |
|              |          |          | <b>45 procedures</b>     |            |                |                               |           |                          |               |                   |  |              |            |            |          |
|              |          |          |                          |            |                | <b>44 LORs</b>                |           |                          |               |                   |  |              |            |            |          |
|              |          |          | <b>26 outcomes</b>       |            |                | <b>1 Antisperm antibodies</b> |           |                          |               |                   |  |              |            |            |          |
|              |          |          | 186 follicles            |            |                | <b>6 CTIs</b>                 |           |                          |               |                   |  |              |            |            |          |
|              |          |          | 86 eggs (46%)            |            |                | <b>11 Tubal insemination</b>  |           |                          |               |                   |  |              |            |            |          |
|              |          |          | 25 with eggs             |            |                | <b>1 AI</b>                   |           |                          |               |                   |  |              |            |            |          |
|              |          |          | 20 inseminations         |            |                |                               |           |                          |               |                   |  |              |            |            |          |
|              |          |          | 8 with embryos (10+2Pns) |            |                |                               |           |                          |               |                   |  |              |            |            |          |
|              |          |          | 7 transfers              |            |                |                               |           |                          |               |                   |  |              |            |            |          |
|              |          |          | <b>5 GIFT</b>            |            |                |                               |           |                          |               |                   |  |              |            |            |          |
|              |          |          |                          |            |                |                               |           |                          |               |                   |  |              |            |            |          |
|              |          |          |                          |            |                |                               |           |                          |               |                   |  |              |            |            |          |
|              |          |          |                          |            |                |                               |           |                          |               |                   |  |              |            |            |          |
|              |          |          |                          |            |                |                               |           |                          |               |                   |  |              |            |            |          |
|              |          |          |                          |            |                |                               |           |                          |               |                   |  |              |            |            |          |
|              |          |          |                          |            |                |                               |           |                          |               |                   |  |              |            |            |          |
|              |          |          |                          |            |                |                               |           |                          |               |                   |  |              |            |            |          |
|              |          |          |                          |            |                |                               |           |                          |               |                   |  |              |            |            |          |
|              |          |          |                          |            |                |                               |           |                          |               |                   |  |              |            |            |          |

| <b>Q</b>                                        | <b>R</b>      | <b>S</b>                                  |
|-------------------------------------------------|---------------|-------------------------------------------|
| <b>Outcome/embryos</b>                          | <b>ET No.</b> | <b>Media/Comments</b>                     |
| 2 damaged - 1 fert, app 6c,ET D2                | 7             | F10/20%FCS/5%HS                           |
| app 4-6c 5/1 - ET D2 (Cannula too wide)         | 8             | F10/20%FCS/5%HS                           |
| eggs all 1c, sperm still active                 |               | IgM in serum & Cx mucus all               |
| <b>Intratubal insemin. Foll seen to rupture</b> |               |                                           |
| <b>sperm + egg to oviduct</b>                   | <b>GIFT</b>   |                                           |
| <b>1 egg+sperm to oviduct;1 insemin</b>         | <b>GIFT</b>   | <b>1:eggie v sticky when trans to F10</b> |
| <b>sperm + egg to oviduct</b>                   | <b>GIFT</b>   | <b>sperm diluted to 10ml/ml 'GIFT</b>     |
| <b>sperm + egg to oviduct</b>                   | <b>GIFT</b>   |                                           |
| <b>sperm + egg to oviduct</b>                   | <b>GIFT</b>   |                                           |
| all 1-c Why did eggs decline? Could be medium   |               | 22nd: sperm clumped but not contaminated  |
| had to reinseminate 8pm; eggs went dark         |               | 22nd: sperm contaminated with grm + bugs  |
| <b>Tubal insemination</b>                       |               |                                           |
| <b>Tubal insemination</b>                       |               |                                           |
| 1GV, 1?Pn?                                      |               |                                           |
| Pn x ?3                                         |               |                                           |
| <b>Timed intercourse</b>                        |               |                                           |
| 1-c & degenerate                                |               | Tyrode +BSA + NaPv+Na HCO3                |
| <b>Tubal insemination</b>                       |               |                                           |
| don't look fert - eggs unhappy & 1-c            |               | serum not inactivated                     |
| all 1-c; v.thick zp - sperm on edge of egg      |               | serum: activated + not inactivated        |
| <b>Tubal insemination</b>                       |               |                                           |
| <b>Tubal insemination</b>                       |               |                                           |
| 2Pn 2PB x 2; 2c fragmented                      |               |                                           |
| Nothing else recorded                           |               | F10 + 20% FCS+5%HS                        |
| No fert; sp v. weak - reinseminated             |               |                                           |
| No fert; reinseminated                          |               |                                           |
| 1-c. sperm going like a rocket!                 |               |                                           |

|                                     |    |                                    |
|-------------------------------------|----|------------------------------------|
| 3x8-c 2transf. 3rd 12c on 29/2(D4)  | 9  | F10 (10x) + 15%FCS                 |
| 5-6c, ET 10pm D2                    | 10 | F10 (10x) + 15%FCS Mr Booker serum |
| 1x 5-6c, ET 10.20am D3              | 11 | F10 20% FCS                        |
| <b>Tubal insemination</b>           |    |                                    |
| GV                                  |    |                                    |
| <b>Tubal insemination</b>           |    |                                    |
| 4-5c, v nice -ET 2pm D2             | 12 | 25% F10 + 0.5%BSA/5%F10 + 20% FCS  |
| <b>Tubal insemination</b>           |    |                                    |
| <b>Seminal Antisperm Antibodies</b> |    |                                    |
| 4c ET 2.30pm D2                     | 13 | F10 + 0.5% BSA 33% v/v             |
| <b>?Had ovulated - AI</b>           |    |                                    |
| <b>Tubal insemination</b>           |    |                                    |
| <b>Tubal insemination</b>           |    |                                    |
|                                     |    |                                    |
|                                     |    |                                    |
|                                     |    |                                    |
|                                     |    |                                    |
|                                     |    |                                    |
|                                     |    |                                    |
|                                     |    |                                    |
|                                     |    |                                    |
|                                     |    |                                    |
|                                     |    |                                    |
|                                     |    |                                    |
|                                     |    |                                    |
|                                     |    |                                    |
|                                     |    |                                    |
|                                     |    |                                    |
|                                     |    |                                    |
|                                     |    |                                    |
|                                     |    |                                    |
|                                     |    |                                    |
|                                     |    |                                    |
|                                     |    |                                    |
|                                     |    |                                    |
|                                     |    |                                    |
|                                     |    |                                    |
|                                     |    |                                    |
|                                     |    |                                    |
|                                     |    |                                    |
|                                     |    |                                    |
|                                     |    |                                    |
|                                     |    |                                    |

| T                                  | U | V | W                 | X | Z |
|------------------------------------|---|---|-------------------|---|---|
| <b>Monitoring/Comments</b>         |   |   | RTM               |   |   |
| Daily 24 hr urines                 |   |   |                   |   |   |
|                                    |   |   | 24/2/73 (52d)     |   |   |
|                                    |   |   |                   |   |   |
|                                    |   |   |                   |   |   |
|                                    |   |   | <b>15/02/1973</b> |   |   |
|                                    |   |   |                   |   |   |
|                                    |   |   |                   |   |   |
|                                    |   |   |                   |   |   |
|                                    |   |   |                   |   |   |
|                                    |   |   |                   |   |   |
|                                    |   |   |                   |   |   |
|                                    |   |   |                   |   |   |
|                                    |   |   |                   |   |   |
|                                    |   |   |                   |   |   |
|                                    |   |   |                   |   |   |
|                                    |   |   |                   |   |   |
|                                    |   |   |                   |   |   |
| serum not inactivated              |   |   |                   |   |   |
|                                    |   |   |                   |   |   |
|                                    |   |   |                   |   |   |
|                                    |   |   |                   |   |   |
|                                    |   |   |                   |   |   |
| serum: activated + not inactivated |   |   |                   |   |   |
| sperm collected, incubated 1.30pm  |   |   |                   |   |   |
|                                    |   |   |                   |   |   |
|                                    |   |   |                   |   |   |

|                                      |  |  |            |  |
|--------------------------------------|--|--|------------|--|
| remaining embryo 12c on 29/7         |  |  | 09/08/1973 |  |
| Sperm going like a rocket!           |  |  |            |  |
|                                      |  |  |            |  |
|                                      |  |  |            |  |
|                                      |  |  |            |  |
|                                      |  |  |            |  |
|                                      |  |  |            |  |
|                                      |  |  |            |  |
|                                      |  |  |            |  |
| osmometry with FF/ + serum (286/282) |  |  | 24/12/1973 |  |
|                                      |  |  |            |  |
|                                      |  |  |            |  |
|                                      |  |  |            |  |
|                                      |  |  |            |  |
|                                      |  |  |            |  |
|                                      |  |  |            |  |
|                                      |  |  |            |  |
|                                      |  |  |            |  |
|                                      |  |  |            |  |
|                                      |  |  |            |  |
|                                      |  |  |            |  |
|                                      |  |  |            |  |
|                                      |  |  |            |  |
|                                      |  |  |            |  |
|                                      |  |  |            |  |
|                                      |  |  |            |  |
|                                      |  |  |            |  |
|                                      |  |  |            |  |
|                                      |  |  |            |  |
|                                      |  |  |            |  |
|                                      |  |  |            |  |

| A            | B        | C        | D                      | E          | F            | G          | H         | I                | J           | K                      | L | M           | N        | O        |
|--------------|----------|----------|------------------------|------------|--------------|------------|-----------|------------------|-------------|------------------------|---|-------------|----------|----------|
| Book         | FF       | Notes    | Churchill              | No         | P-Code       | L-No       | Age       | Stim             | hCG         | Lap Date               |   | hCG-OCR     | folls    | eggs     |
| L4/H3        | x        |          | Folder 19              | 257        | 145 (1)      | 391        | 24        | NC hCG           | 5000        | 20/01/1974             |   |             | 4        | 0        |
| <b>L4/H3</b> | <b>x</b> |          | <b>Folder 19</b>       | <b>258</b> | <b>4 (4)</b> | <b>392</b> | <b>32</b> | <b>NC hCG</b>    | <b>5000</b> | <b>No lap - IUI</b>    |   |             |          |          |
| <b>L4/H3</b> | <b>x</b> |          |                        | <b>259</b> | <b>146</b>   | <b>393</b> | <b>NR</b> | <b>x</b>         | <b>x</b>    | <b>Cancelled</b>       |   |             |          |          |
| L4/H3        | x        | x        | Folder 19              | 260        | 107 (3)      | 394        | 27        | P3 x 4           | 5000        | 12/02/1974             |   | 32.75       | 10       | 4        |
| L4/H3        | x        | x        | Folder 19              | 261        | 147 (1)      | 395        | 27        | P3 x 4           | 5000        | 12/02/1974             |   | 32.75       | 7        | 2        |
| L4/H4        | x        | x        | Folder 19              | 262        | 148          | 396        | 33        | P3 x 4           | 5000        | 11/03/1974             |   | 32.5        | 15       | 6        |
| L4/H4        | x        | x        | Folder 11, Path report | 263        | 44 (6)       | 397        | 37        | P3 x 4           | 5000        | 11/03/1974             |   | 32.5        | 5        | 2        |
| L4/H4        | x        | x        | Folder 19              | 264        | 149          | 398        | NR        | P4 x 3           | 5000        | 12/03/1974             |   | 34.25       | 5        | 4        |
| L5/H4        | x        | x        | Folder 19              | 265        | 100 (3)      | 399        | 32        | NC+Pregny        | 5000        | 16/03/1974             |   | 32.5        | 1        | 0        |
| L5/H4        | x        | x        | Folder 19              | 266        | 150          | 400        | 40        | NC+Pregny        | 5000        | 16/03/1974             |   | 32.25       | 2        | 2        |
| L5/H4        | x        | x        | Folder 19              | 267        | 130 (2)      | 401        | 32        | NC+Pregny        | 5000        | 16/03/1974             |   | 32          | 3        | 1        |
| L5/H4        | x        | x        | Folder 19              | 268        | 151          | 402        | 30        | NC+Pregny        | 5000        | 18/03/1974             |   | 34          | 4        | 2        |
| L5/H4        | x        | x        | Folder 19              | 269        | 152 (1)      | 403        | 33        | NC+Pregny        | 5000        | 18/03/1974             |   | 32.5        | 2        | 1        |
| <b>L5</b>    | <b>x</b> |          |                        | <b>270</b> | <b>125M</b>  | <b>404</b> |           |                  |             | <b>sperm prep only</b> |   |             |          |          |
| <b>L5</b>    | <b>x</b> |          |                        | <b>271</b> | <b>153</b>   | <b>405</b> |           |                  |             | <b>sperm prep only</b> |   |             |          |          |
| <b>L5</b>    | <b>x</b> |          |                        | <b>272</b> | <b>130M</b>  | <b>406</b> |           | <b>ASA tests</b> |             |                        |   |             |          |          |
| L5/H4        | x        | **       | Folder 19              | 273        | 154          | 407        | 27        | NC + Pregn       | 5000        | 30/03/1974             |   | 32.5        | 4        | 3        |
| L5/H4        | x        | **       | Folder 19              | 274        | 114 (5)      | 408        | 34        | NC + Pregn       | 5000        | 30/03/1974             |   | 32.25       | 3        | 2        |
| L5/H4        | x        | x        | Folder 19              | 275        | 155 (1)      | 409        | 37        | NC + Pregn       | 5000        | 25/04/1974             |   | 32.5        | 3        | 1        |
| L5/H4        | x        | x        |                        | 276        | 156          | 410        | 32        | NC+Pregny        | 1700        | 25/04/1974             |   | 32.5        | 6        | 1        |
| L5/H4        | x        | x        | Folder 19              | 277        | 157 (1)      | 411        | 29        | LH d 13          | 5000        | 28/04/1974             |   | 33.25       | 6        | 3        |
| L5/H4        | x        | x        | Folder 19              | 278        | 158 (1)      | 412        | 30        | N.C. LH d13      | 5000        | 28/04/1974             |   | 33          | 4        | 4        |
| L5/H4        | x        | x        | Folder 19              | 279        | 144 (2)      | 413        | 28        | NC+Pregny        | 5000        | 06/05/1974             |   | 32.5        | 7        | 6        |
| <b>L5/H4</b> | <b>x</b> | <b>x</b> | <b>Folder 11, EB;</b>  | <b>280</b> | <b>159</b>   | <b>414</b> | <b>NR</b> | <b>NC+Pregny</b> | <b>5000</b> | <b>07/05/1974</b>      |   | <b>32.5</b> | <b>2</b> | <b>2</b> |
| L5/H4        | x        | x        | Folder 19              | 281        | 160          | 415        | NR        | NC+Pregny        | 5000        | 08/05/1974             |   | 32.5        | 6        | 2        |
| L5/H4        | x        | x        | Folder 19              | 282        | 161          | 416        | NR        | P4 x 3           | 5000        | 08/05/1974             |   |             | 0        | 0        |
| L5/H4        | x        | x        | Folder 19              | 283        | 135 (2)      | 417        | 36        | NC+Pregny        | 5000        | 09/05/1974             |   | 32.5        | 3        | 3        |
| L5/H4        | x        | x        | Folder 19              | 284        | 54 (4)       | 418        | 30        | NC+Pregny        | 5000        | 15/05/1974             |   | 32.5        | 3        | 3        |
| L5/H4        | x        | x        | Folder 19              | 285        | 162          | 419        | 28        | NC+Pregny        | 5000        | 15/05/1974             |   | 32          | 6        | 3        |
| L5/H4        | x        |          |                        | 286        | 163          | 420        | 27        | NC+Pregny        | 5000        | 15/05/1974             |   | 32          | 6        | 1        |
| L5/H4        | x        | x        | Folder 19              | 287        | 164 (1)      | 421        | 30        | NC+Pregny        | 5000        | 15/05/1974             |   | 33          | 4        | 3        |
| <b>L5/H4</b> | <b>x</b> | <b>x</b> | <b>Folder 19</b>       | <b>288</b> | <b>165</b>   | <b>422</b> | <b>26</b> | <b>NC+Pregny</b> | <b>5000</b> | <b>15/05/1974</b>      |   |             | <b>2</b> | <b>2</b> |

|              |          |          |                                           |            |                |            |           |                                |             |                   |  |       |          |            |           |
|--------------|----------|----------|-------------------------------------------|------------|----------------|------------|-----------|--------------------------------|-------------|-------------------|--|-------|----------|------------|-----------|
| L5/H4        | x        | x        | Folder 19                                 | 289        | 166            | 423        | 25        | Perg/Pregnyl                   |             | 28/05/1974        |  | 33    | 3        | 0          |           |
| L5/H4        | x        | x        | Folder 19                                 | 290        | 44 (7)         | 424        | 36        | Perg/Pregnyl                   |             | 28/05/1974        |  | 33    | 7        | 4          |           |
| <b>L5/H4</b> | <b>x</b> | <b>x</b> | <b>Folder 19</b>                          | <b>291</b> | <b>167</b>     | <b>425</b> | <b>NR</b> | <b>?</b>                       | <b>5000</b> | <b>28/05/1974</b> |  |       | <b>0</b> | <b>0</b>   |           |
| L5/H4        | x        | x        | Folder 19                                 | 292        | 168            | 426        | NR        | NC+Pregny                      | 5000        | 28/05/1974        |  | 32.5  | 7        | 4          |           |
| L5/H4        | x        | x        | Folder 19                                 | 293        | 169            | 427        | NR        | NC+Pregny                      | 5000        | 30/05/1974        |  |       | 4        | 0          |           |
| <b>L5/H4</b> | <b>x</b> | <b>x</b> | <b>Folder 19</b>                          | <b>294</b> | <b>125 (4)</b> | <b>428</b> | <b>29</b> | <b>NC+Pregny</b>               | <b>5000</b> | <b>30/05/1974</b> |  |       | <b>3</b> | <b>2</b>   |           |
| L5/H4        | x        | x        | Folder 19                                 | 295        | 28 (5)         | 429        | 40        | Perg/Pregny                    | 5000        | 31/05/1974        |  |       | 5        | 2          |           |
| L5/H4        | x        | x        | Folder 19                                 | 296        | 144 (3)        | 430        | 28        | Perg/Pregny                    | 5000        | 31/05/1974        |  | 32.5  | 8        | 0          |           |
| L5/H4        | x        | x        | Folder 19                                 | 297        | 170            | 431        | NR        | NC+Pregny                      | 5000        | 07/06/1974        |  | 33    | 6        | 4          |           |
| L5/H4        | x        | x        | Folder 19                                 | 298        | 171            | 432        | NR        | NC+Pregny                      | 5000        | 07/06/1974        |  | 32.75 | 7        | 3          |           |
| L5/H4        | x        | x        | Folder 19                                 | 299        | 164 (2)        | 433        | 30        | P3 x 4                         | 5000        | 09/06/1974        |  | 32.5  | 8        | 3          |           |
|              |          |          |                                           |            |                |            |           |                                |             |                   |  |       |          | <b>181</b> | <b>85</b> |
|              |          | **       | no lap sheet;<br>named on scraps of paper |            |                |            |           |                                |             |                   |  |       |          |            |           |
|              |          |          | <b>43 procedures</b>                      |            |                |            |           |                                |             |                   |  |       |          |            |           |
|              |          |          |                                           |            |                |            |           | <b>37 LORs</b>                 |             |                   |  |       |          |            |           |
|              |          |          | <b>35 outcomes</b>                        |            |                |            |           | <b>2 sperm prep only</b>       |             |                   |  |       |          |            |           |
|              |          |          | 181 follicles                             |            |                |            |           | <b>3 Lap Sterilizations</b>    |             |                   |  |       |          |            |           |
|              |          |          | 85 eggs                                   |            |                |            |           | <b>1 anti sperm antibodies</b> |             |                   |  |       |          |            |           |
|              |          |          | 7 No eggs                                 |            |                |            |           | <b>1 IUI</b>                   |             |                   |  |       |          |            |           |
|              |          |          | 31 Inseminations (incl. steri cases)      |            |                |            |           | <b>1 cancelled</b>             |             |                   |  |       |          |            |           |
|              |          |          | 11 Cases with embryos (1 steri)           |            |                |            |           |                                |             |                   |  |       |          |            |           |
|              |          |          | 9 cases with ET (2 via lap)               |            |                |            |           |                                |             |                   |  |       |          |            |           |
|              |          |          | <b>1 ?GIFT? L428</b>                      |            |                |            |           |                                |             |                   |  |       |          |            |           |
|              |          |          |                                           |            |                |            |           |                                |             |                   |  |       |          |            |           |
|              |          |          |                                           |            |                |            |           |                                |             |                   |  |       |          |            |           |
|              |          |          |                                           |            |                |            |           |                                |             |                   |  |       |          |            |           |
|              |          |          |                                           |            |                |            |           |                                |             |                   |  |       |          |            |           |
|              |          |          |                                           |            |                |            |           |                                |             |                   |  |       |          |            |           |
|              |          |          |                                           |            |                |            |           |                                |             |                   |  |       |          |            |           |
|              |          |          |                                           |            |                |            |           |                                |             |                   |  |       |          |            |           |
|              |          |          |                                           |            |                |            |           |                                |             |                   |  |       |          |            |           |
|              |          |          |                                           |            |                |            |           |                                |             |                   |  |       |          |            |           |
|              |          |          |                                           |            |                |            |           |                                |             |                   |  |       |          |            |           |

| P            | Q                                               | R      | S                                                             |
|--------------|-------------------------------------------------|--------|---------------------------------------------------------------|
| insem        | Outcome/comments                                | ET no. | Media/comments                                                |
|              | no oocytes recovered                            |        |                                                               |
|              | <b>IUI</b>                                      |        |                                                               |
|              | <b>cancelled</b>                                |        |                                                               |
| 33.25        | 2 embryos transf in 0.7ml F10+10%HS D3          | 14     |                                                               |
| 33.5         | at least 16c, stripy - ET 12.15, 0.5mls         | 15     | 0.5g% BSA 0.28 g NaHCO3                                       |
| 33.25        | All 1-c, 2 w/GV - did not cleave                |        |                                                               |
| 33           | 1x8c, v nice ET 6pm D2                          | 16     | F10 +0.5% BSA 5% HS v/v                                       |
| 35.5         | Did not cleave No sperm near eggs               |        | F10 +0.5% BSA 5% HS v/v                                       |
|              | no egg                                          |        |                                                               |
| 32.5         | 2PN - fixed D3                                  |        | Mr Parson seminal plasma                                      |
| 33           | MII 1PB                                         |        | Mr Harper serum, seminal plasma                               |
| 34,5         | v. nice 6-8c; ET 2pm D2                         | 17     | F10+L-glut+Pen+10% HS 285 mOsm 0.5% BSA 5% HS; Fed with Tyr B |
| immed        | 1-c, no cleavage                                |        | F10 +0.5% BSA 5% HS v/v fed with Tyrode B                     |
|              | <b>sperm prep: suitable for insemination</b>    |        |                                                               |
|              | <b>sperm prep: suitable for insemination</b>    |        |                                                               |
| immed        | 1xGV, 2x Mii 2PB                                |        |                                                               |
| 32.5         | 4c & 8c transf; egg3 blastocyst on D5           | 18     | F10 +0.5% BSA 5% HS v/v fed with Tyrode B                     |
| immed        | no cleavage - fixed                             |        |                                                               |
| 33           | GV - no cleavage                                |        |                                                               |
| 33.5         | all 1-c;(4) fixed in formalin, stained - Met II |        |                                                               |
| 33.5         | 8c ET 8pm D2 via laparoscope into fundus        | 19     |                                                               |
|              | all 1-c                                         |        |                                                               |
| <b>(RGE)</b> | <b>sterilization; 16c onD4</b>                  |        |                                                               |
| immed        | 2xGV                                            |        |                                                               |
|              | no oocytes recovered                            |        |                                                               |
| immed        | 2x 6-8c ET, 2.50 pm D2                          | 20     | F10 +0.5% BSA, fed w/ 0.5% BSA/10% HS                         |
| 32.6         | 8c superb ET 7.15pm D2                          | 21     | F10 + 0.75% BSA, then +1%HS                                   |
|              | all 1-c                                         |        |                                                               |
|              | 1-c                                             |        |                                                               |
| 33.5         | all 1-c                                         |        |                                                               |
| <b>immed</b> | <b>sterilization; all 1-c</b>                   |        |                                                               |





| <b>T</b>           | <b>U</b> | <b>V</b> | <b>W</b>   | <b>X</b>                                                | <b>Z</b> |
|--------------------|----------|----------|------------|---------------------------------------------------------|----------|
| <b>Monitoring</b>  |          |          | <b>RTM</b> | <b>Comments</b>                                         |          |
| Daily 24 hr urines |          |          |            |                                                         |          |
|                    |          |          |            |                                                         |          |
|                    |          |          | 28/02/1974 |                                                         |          |
|                    |          |          |            |                                                         |          |
|                    |          |          | 23/03/1974 |                                                         |          |
|                    |          |          |            |                                                         |          |
|                    |          |          |            |                                                         |          |
|                    |          |          | 09/04/1974 | V light period followed by heavy period, ? Tissue lost? |          |
|                    |          |          |            |                                                         |          |
|                    |          |          |            |                                                         |          |
|                    |          |          | 17/04/1974 |                                                         |          |
|                    |          |          |            |                                                         |          |
|                    |          |          |            |                                                         |          |
|                    |          |          | 16/05/1974 | anaesthetist notes for ET                               |          |
|                    |          |          |            |                                                         |          |
|                    |          |          |            |                                                         |          |
|                    |          |          | 26/05/1974 |                                                         |          |
|                    |          |          | 29/05/1974 |                                                         |          |
|                    |          |          |            |                                                         |          |
|                    |          |          |            |                                                         |          |
|                    |          |          |            |                                                         |          |
|                    |          |          |            |                                                         |          |



| A     | B  | C     | D                  | E   | F       | G    | H   | I          | J    | K          | L | M   | N     | O    | P     |
|-------|----|-------|--------------------|-----|---------|------|-----|------------|------|------------|---|-----|-------|------|-------|
| Book  | FF | Notes | Churchill          | No. | P-Code  | L no | Age | Stim       | Dose | Lap Date   |   | hCG | Folls | Eggs | insem |
| L5    |    |       |                    | 300 | 172     | 434  | 40  |            |      |            |   |     |       |      |       |
| L5    |    |       |                    | 301 | 173     | 435  | 35  |            |      |            |   |     |       |      |       |
| L5    |    |       |                    | 302 | 174     | 436  | 28  |            |      |            |   |     |       |      |       |
| L5    |    |       |                    | 303 | 175     | 427  | 27  |            |      |            |   |     |       |      |       |
| L5/H4 | x  | x     |                    | 304 | 176 (1) | 438  | 27  | NC         |      | 16/03/1975 |   |     | 12    | 7    | 34    |
| L5/H4 | x  | x     |                    | 305 | 114 (6) | 439  | 35  | NC+Prognyl |      | 16/03/1975 |   |     | 6     | 1    |       |
| L5/H4 | x  | x     |                    | 306 | 177     | 440  | NR  | pergonal   |      | 23/04/1975 |   |     | 10    | 6    |       |
| L5/H4 | x  | x     |                    | 307 | 178     | 441  | 29  | pergonal   |      | 26/04/1975 |   |     | 6     | 4    |       |
| L5/H4 | x  | x     | Folder 11 -S/A     | 308 | 28 (6)  | 442  | 40  | P4 x4      |      | 26/04/1975 |   |     | 8     | 3    | 33    |
| L5/H4 |    |       | Folder 11 -S/A     | 309 | 179 (1) | 443  | 35  | P3 x 4     |      | Cancelled  |   |     |       |      |       |
| L5/H4 | x  | x     | Folder 11 -TE      | 310 | 179 (2) | 444  | 35  | P3 x 4     |      | 19/06/1975 |   |     | 12    | 6    | immed |
| L5/H4 | x  | x     | Folder 11 -TE      | 311 | 28 (7)  | 445  | 40  | P3 x 4     |      | 19/06/1975 |   |     | 5     | 2    | immed |
| L5/H3 | x  | x     | Folder 11 -TE, S/A | 312 | 38 (5)  | 446  | 35  | P4x3       |      | 19/06/1975 |   |     | 5     | 4    | immed |
| L5/H4 | x  | x     | Folder 11 -TE      | 313 | 180     | 447  | NR  | pergonal   |      | 21/06/1975 |   |     | 4     | 3    |       |
| L5/H4 | x  | x     | Folder 11 -S/A     | 314 | 69 (4)  | 448  | 38  | P4x3       |      | 28/06/1975 |   |     | 6     | 2    |       |
| L5    | x  | x     | Folder 11 -S/A     | 315 | 181 (1) | 449  | 29  | pergonal   |      | 28/06/1975 |   |     | 5     | 1    |       |
| L5/H4 | x  | x     |                    | 316 | 135 (3) | 450  | 37  | pergonal   |      | 29/06/1975 |   |     | 5     | 3    |       |
| L5/H4 | x  | x     |                    | 317 | 176 (2) | 451  | 27  | pergonal   |      | 01/07/1975 |   |     | 7     | 1    |       |
| L5/H4 | x  |       |                    | 318 | 114 (7) | 452  | 36  | pergonal   |      | 01/07/1975 |   |     | 4     | 2    |       |
| L5/H4 | x  |       |                    | 319 | 182     | 453  | 34  | pergonal   |      | 06/07/1975 |   |     | 4     | 2    |       |
| L5/H4 | x  | x     |                    | 320 | 158 (2) | 454  | 31  | pergonal   |      | 06/07/1975 |   |     | 10    | 6    |       |
| L5/H4 | x  | x     |                    | 321 | 183     | 455  | 26  | P4x3       |      | 03/09/1975 |   |     | 8     | 4    |       |
| L5/H4 | x  | x     |                    | 322 | 184     | 456  | 25  | P4x3       |      | 03/09/1975 |   |     | 6     | 4    |       |
| L5/H4 | x  | x     |                    | 323 | 135 (4) | 457  | 37  | P4x3       |      | 03/09/1975 |   |     | 5     | 3    |       |
| L6/H4 | x  | x     |                    | 324 | 131 (2) | 458  | 29  | P3 x 4     |      | 07/09/1975 |   |     | 8     | 5    | 33    |
| L6/H4 | x  | x     | Folder 11 -TE      | 325 | 185     | 459  | 33  | P3 x 4     |      | 09/09/1975 |   |     | 4     | 2    | 33    |
| L6/H4 | x  | x     | Folder 11 -TE      | 326 | 186 (1) | 460  | 27  | P3 x 4     |      | 09/09/1975 |   |     | 7     | 2    | 35    |
| L6/H4 | x  | x     | Folder 11 -TE      | 327 | 187     | 461  | 42  | P3 x 4     |      | 10/09/1975 |   |     | 5     | 7    | 33.5  |
| L6/H4 | x  | x     | Folder 11 -TE      | 328 | 188     | 462  | 28  | P3 x 4     |      | 12/09/1975 |   |     | 7     | 3    | 33    |
| L6/H4 | x  | x     | Folder 11 -TE      | 329 | 164 (3) | 463  | 31  | P3 x 4     |      | 12/09/1975 |   |     | 7     | 4    |       |
| L6/H3 | x  | x     | Folder 11 -TE      | 330 | 157 (2) | 464  | 30  | P3 x 4     |      | 13/09/1975 |   |     | 15    | 7    | 34    |
| L6/H3 | x  | x     |                    | 331 | 189     | 465  | 25  | NC/hCG     |      | 09/12/1975 |   |     | 6     | 3    |       |



| Q                                         | R      | S                                              |
|-------------------------------------------|--------|------------------------------------------------|
| comment                                   | ET No. | comments                                       |
| Addenbrookes pts c/o Mr Robinson          |        | FF Feb 24th, spun                              |
| Addenbrookes pts c/o Mr Robinson          |        | on the pill; 1 foll Feb 25th, fluid to Ruth    |
| Addenbrookes pts c/o Mr Robinson          |        | baby born 8wks ago; small foll 27/2            |
| Addenbrookes pts c/o Mr Robinson          |        | h/o amenorrhea interludes - <1cm foll          |
| no cleavage                               |        | GA drugs listed (TP, Gall, Pentaz, atr, neost) |
| no oocytes worth collecting               |        |                                                |
| 8c on D4 - degenerating                   |        | GA drugs listed (TP, Gall, Pentaz, atr, neost) |
| all 1-c: GV, MII, MII1PB, 2PB             |        |                                                |
| 2MII, 1 early blasto/late morul, ET on D4 | 23     |                                                |
| E2 never rose >15, extended P Rx          |        |                                                |
| All 1-c; GV, 3x MII, 1 degen              |        |                                                |
| early blasto D4; ET 8.30pm                | 24     |                                                |
| stripy morula, ET 8.15pm D4               | 25     | pg established to Aug 14th                     |
| no cleavage - all MII                     |        |                                                |
| no cleavage                               |        |                                                |
| no cleavage                               |        |                                                |
| degenerate 2c on D2                       |        |                                                |
| no cleavage                               |        |                                                |
| 2PN, 1PB, 2PB?                            |        |                                                |
| GV no cleavage                            |        |                                                |
| no cleavage - fixed                       |        |                                                |
| exp blasto on D7 ET 9pm Sept 10th         | 26     |                                                |
| no cleavage                               |        |                                                |
| 3 blast- 1 transf D4, 1D5 - 3rd fixed     | 27     |                                                |
| all 1-c ? Underinseminated?               |        |                                                |
| 2xGV 'not a sperm in sight'               |        |                                                |
| 1-c, stripy ?early blast? ET 14/9 D5      | 28     |                                                |
| all 1-c; GV, 1PB, fragmenting egg         |        |                                                |
| 2x1c, 1 beautiful blasto ET 2.30pm D5     | 29     |                                                |
| early blasto ET 3pm D5; 2x1-c             | 30     |                                                |
| 1x8-16c - degenerate on D5                |        |                                                |
| all MII no PN visible                     |        |                                                |



| T                                            | U | V | W | X                                | Z |
|----------------------------------------------|---|---|---|----------------------------------|---|
| <b>Media/comments</b>                        |   |   |   |                                  |   |
|                                              |   |   |   |                                  |   |
|                                              |   |   |   |                                  |   |
|                                              |   |   |   |                                  |   |
|                                              |   |   |   |                                  |   |
| <i>TyrB/C, Earles, Hams F10</i>              |   |   |   |                                  |   |
| F10/HAS                                      |   |   |   |                                  |   |
| inact serum/plasma/FF                        |   |   |   |                                  |   |
| FF inact serum                               |   |   |   |                                  |   |
|                                              |   |   |   |                                  |   |
| FF/laparoscopy plasma/inact serum            |   |   |   |                                  |   |
| FF/laparoscopy plasma/inact serum            |   |   |   |                                  |   |
| <b>FF/laparoscopy plasma/inact serum</b>     |   |   |   | <b>Cornual Ectopic Pregnancy</b> |   |
| FF/laparoscopy plasma/inact serum            |   |   |   |                                  |   |
| FF/laparoscopy plasma/inact serum            |   |   |   |                                  |   |
| FF/laparoscopy plasma/inact serum            |   |   |   |                                  |   |
| FF/laparoscopy plasma/inact serum            |   |   |   |                                  |   |
| FF/laparoscopy plasma/inact serum            |   |   |   |                                  |   |
| FF/laparoscopy plasma/inact serum            |   |   |   |                                  |   |
| FF/laparoscopy plasma/inact serum            |   |   |   |                                  |   |
| FF/laparoscopy plasma/inact serum            |   |   |   |                                  |   |
| FF/laparoscopy plasma/inact serum            |   |   |   |                                  |   |
| FF/laparoscopy plasma/inact serum            |   |   |   |                                  |   |
| FF/laparoscopy plasma/inact serum            |   |   |   |                                  |   |
| FF/laparoscopy plasma/inact serum            |   |   |   |                                  |   |
| <b>F10, Earles (see notes 6/9/75)</b>        |   |   |   |                                  |   |
| laparoscopy plasma/inact serum'Tyr B, Tyr C; |   |   |   |                                  |   |
| FF/laparoscopy plasma                        |   |   |   |                                  |   |
| laparoscopy plasma/inact serum               |   |   |   | ?Chonionic villi? (H4 only)      |   |
| FF/laparoscopy plasma                        |   |   |   |                                  |   |
| FF/laparoscopy plasma                        |   |   |   |                                  |   |
| FF/laparoscopy plasma                        |   |   |   |                                  |   |
|                                              |   |   |   |                                  |   |
|                                              |   |   |   |                                  |   |





| A            | B        | C     | D                           | E          | F              | G          | H         | I                    | J           | K                 | L | M            | N         | O        | P      |
|--------------|----------|-------|-----------------------------|------------|----------------|------------|-----------|----------------------|-------------|-------------------|---|--------------|-----------|----------|--------|
| Book         | FF       | Notes | Churchill                   | Numl       | P-Code         | L No       | Age       | Stim                 | hCG         | Lap Date          |   | h-O hr:      | folls     | eggs     | insert |
| L6/H4        | x        |       | D2 Curettings               | 340        | 28 (8)         | 473        | 40        | P4x4                 | 5000        | 18/03/1976        |   |              | 12        | 7        |        |
| L6/H4        | x        |       | Folder 11 -TE               | 341        | 195            | 474        | 24        | P4x4                 | 5000        | 18/03/1976        |   |              | 5         | 0        |        |
| L6/H4        | x        |       | Folder 11 FBC, TE           | 342        | 196            | 475        | 30        | P4x5                 | 5000        | 18/03/1976        |   |              | 7         | 2        |        |
| L6/H4        | x        |       |                             | 343        | 107 (4)        | 476        | 31        | P4x4                 | 5000        | 20/03/1976        |   |              | 9         | 5        |        |
| L6/H4        | x        |       | Folder 11 FBC               | 344        | 197            | 477        | 27        | P4x4                 | 5000        | 20/03/1976        |   |              | 6         | 0        |        |
| L6/H4        | x        |       |                             | 345        | 181 (2)        | 478        | 30        | P4x4                 | 5000        | 25/03/1976        |   | 32           | 8         | 1        |        |
| L6/H4        | x        |       | Folder 11 -TE               | 346        | 198            | 479        | 38        | P4x4                 | 5000        | 25/03/1976        |   |              | 1         | 1        |        |
| L6/H4        | x        |       |                             | 347        | 199            | 480        | 35        | P4x4                 | 5000        | 25/03/1976        |   | 32           | 3         | 1        |        |
| <b>L6/H4</b> | <b>x</b> |       |                             | <b>348</b> | <b>200 (1)</b> | <b>481</b> | <b>31</b> | <b>P4x4</b>          | <b>5000</b> | <b>Cancelled</b>  |   |              | <b>x</b>  | <b>x</b> |        |
| L6           | x        |       | D2 Curettings               | 349        | 135 (5)        | 482        | 37        | HMG/hCG              |             | 28/03/1976        |   |              | 4         | 2        |        |
| L6/H4        | x        |       |                             | 350        | 201            | 483        | NR        | P5x3                 |             | 10/06/1976        |   |              | 12        | 9        |        |
| <b>L6/H4</b> | <b>x</b> |       |                             | <b>351</b> | <b>202</b>     | <b>484</b> | <b>27</b> | <b>P5x3</b>          | <b>5000</b> | <b>15/06/1976</b> |   | <b>32.25</b> | <b>11</b> | <b>5</b> |        |
| L6/H4        | x        |       |                             | 352        | 203 (1)        | 485        | 37        | HMG/hCG              |             | 15/06/1976        |   |              | 1         | 1        |        |
| L6/H4        | x        |       |                             | 353        | 176 (2)        | 486        | 28        | P5x3                 | 5000        | 18/06/1976        |   |              | 7         | 4        |        |
| L6/H4        | x        |       |                             | 354        | 92 (5)         | 487        | 40        | P5x4                 | 5000        | 18/06/1976        |   |              | 11        | 5        |        |
| <b>L5</b>    | <b>x</b> |       |                             | <b>355</b> | <b>204</b>     | <b>488</b> | <b>25</b> | <b>P5x3</b>          | <b>5000</b> | <b>18/06/1976</b> |   | <b>32.5</b>  | <b>5</b>  | <b>2</b> |        |
| L6/H4        | x        |       |                             | 356        | 205            | 489        | NR        | Pergonal             |             | 18/06/1976        |   |              | 6         | 2        |        |
| L6/H4        | x        |       |                             | 357        | 200 (2)        | 490        | 31        | P5x5                 | 5000        | 19/06/1976        |   | 32           | 8         | 6        |        |
| <b>L6/H3</b> | <b>x</b> |       | <b>Folder 11-curettings</b> | <b>358</b> | <b>185 (2)</b> | <b>491</b> | <b>34</b> | <b>P5x3</b>          | <b>5000</b> | <b>21/06/1976</b> |   | <b>32</b>    | <b>4</b>  | <b>2</b> |        |
| L6/H4        | x        |       |                             | 359        | 206            | 492        | 28        | P5x3                 | 5000        | 21/06/1976        |   |              | 4         | 1        |        |
| L6/H4        | x        |       |                             | 360        | 207 (1)        | 493        | NR        | HMG                  |             | 21/06/1976        |   |              | 7         | 3        |        |
| <b>L6/H4</b> | <b>x</b> |       | <b>Folder 11-curettings</b> | <b>361</b> | <b>188 (2)</b> | <b>494</b> | <b>27</b> | <b>P5x3</b>          | <b>5000</b> | <b>23/06/1976</b> |   |              | <b>6</b>  | <b>3</b> |        |
| L6/H4        | x        |       |                             | 362        | 208            | 495        | 26        | P5x3                 | 5000        | 24/06/1976        |   | 32.25        | 3         | 1        |        |
| L6/H4        | x        |       |                             | 363        | 209 (1)        | 496        | 27        | P5x3                 | 5000        | 01/07/1976        |   | 32           | 8         | 5        |        |
| <b>L6</b>    | <b>x</b> |       |                             | <b>364</b> | <b>210</b>     | <b>497</b> | <b>NR</b> | <b>Sterilization</b> |             | <b>01/07/1976</b> |   |              | <b>5</b>  | <b>2</b> |        |
| <b>L6/H4</b> | <b>x</b> |       |                             | <b>365</b> | <b>211</b>     | <b>498</b> | <b>31</b> | <b>P5x4</b>          | <b>5000</b> | <b>02/07/1976</b> |   | <b>32</b>    | <b>6</b>  | <b>4</b> |        |
| <b>L6/H4</b> | <b>x</b> |       |                             | <b>366</b> | <b>212</b>     | <b>499</b> | <b>28</b> | <b>P5x3</b>          | <b>5000</b> | <b>02/07/1976</b> |   |              | <b>0</b>  | <b>0</b> |        |
| <b>L6/H4</b> | <b>x</b> |       | <b>Folder 11-curettings</b> | <b>367</b> | <b>131 (3)</b> | <b>500</b> | <b>30</b> | <b>P5x3</b>          | <b>5000</b> | <b>03/07/1976</b> |   |              | <b>8</b>  | <b>5</b> |        |
| <b>L6/H4</b> | <b>x</b> |       |                             | <b>368</b> | <b>213 (1)</b> | <b>501</b> | <b>27</b> | <b>P5x3</b>          | <b>5000</b> | <b>03/07/1976</b> |   |              | <b>6</b>  | <b>2</b> |        |
| <b>L6</b>    |          |       |                             | <b>369</b> | <b>69 (5)</b>  | <b>502</b> | <b>37</b> | <b>cancelled</b>     |             | <b>x</b>          |   |              | <b>x</b>  | <b>x</b> |        |
| L7/H7        | x        |       |                             | 370        | 214            | 600        | 30        | P5x3                 | 5000        | 02/09/1976        |   |              | 10        | 1        |        |
| L7/H7        | x        |       |                             | 371        | 215            | 601        | NR        | P5 x3                | 5000        | 03/09/1976        |   |              | 8         | 4        |        |

|              |          |          |                                |            |                |                                 |           |                 |             |                      |  |  |            |            |
|--------------|----------|----------|--------------------------------|------------|----------------|---------------------------------|-----------|-----------------|-------------|----------------------|--|--|------------|------------|
| L7/H7        | x        |          |                                | 372        | 57 (4)         | 602                             | 34        | P5 x4           | 5000        | 03/09/1976           |  |  | 6          | 3          |
| L7/H7        | x        |          |                                | 373        | 216            | 603                             | 31        | P5 x 3          | 5000        | 05/09/1976           |  |  | 11         | 6          |
| L7/H7        | x        |          |                                | 374        | 217            | 604                             | 39        | P5 x 3          |             | 05/09/1976           |  |  | 5          | 2          |
| L7/H7        | x        |          |                                | 375        | 218            | 605                             | NR        | P5 x 3          | 5000        | 10/05/1976           |  |  | 2          | 2          |
| <b>L7/H7</b> | <b>x</b> |          |                                | <b>376</b> | <b>219</b>     | <b>606</b>                      | <b>NR</b> | <b>P5 x 3</b>   | <b>5000</b> | <b>Refused</b>       |  |  | <b>x</b>   | <b>x</b>   |
| <b>L7/H7</b> | <b>x</b> |          | <b>Folder 11 -TE,curetting</b> | <b>377</b> | <b>28 (9)</b>  | <b>607</b>                      | <b>40</b> | <b>P5 x 4</b>   | <b>5000</b> | <b>11/09/1976</b>    |  |  | <b>8</b>   | <b>2</b>   |
| <b>L7/H7</b> | <b>x</b> |          | <b>Folder 11 - curettings</b>  | <b>378</b> | <b>207 (2)</b> | <b>608</b>                      | <b>NR</b> | <b>P5 x 3</b>   | <b>5000</b> | <b>12/09/1976</b>    |  |  | <b>9</b>   | <b>7</b>   |
| L7/H7        | x        |          |                                | 379        | 220 (1)        | 609                             | 36        | P5 x 3          | 5000        | 17/09/1976           |  |  | 8          | 5          |
| L7/H7        | x        |          |                                | 380        | 221            | 610                             | NR        | P5 x 3          | 5000        | 17/09/1976           |  |  | 5          | 0          |
| L7/H7        | x        |          |                                | 381        | 222 (1)        | 611                             | 32        | P5 x 4          | 5000        | 18/09/1976           |  |  | 7          | 2          |
| <b>L7/H7</b> | <b>x</b> |          | <b>Folder 11-curettings</b>    | <b>382</b> | <b>199 (2)</b> | <b>612</b>                      | <b>35</b> | <b>P5 x 4</b>   | <b>5000</b> | <b>18/09/1976</b>    |  |  | <b>5</b>   | <b>2</b>   |
| L7/H7        | x        |          |                                | 383        | 223            | 613                             | NR        | P5 x 3          |             | 19/09/1976           |  |  | 3          | 2          |
| <b>L7/H7</b> | <b>x</b> | <b>x</b> |                                | <b>384</b> | <b>224</b>     | <b>614</b>                      | <b>NR</b> | <b>P5 x 3</b>   | <b>3000</b> | <b>x</b>             |  |  | <b>x</b>   | <b>x</b>   |
| L7/H7        | x        | x        |                                | 385        | 225            | 615                             | 34        | P5 x 3          | 3000        | 07/12/1976           |  |  | 7          | 3          |
| L7/H7        | x        | x        |                                | 386        | 226            | 616                             | NR        | P5/2 x 4        | 3000        | 08/12/1976           |  |  | 8          | 5          |
| <b>L7</b>    |          |          |                                | <b>387</b> | <b>227</b>     |                                 |           | <b>AIH</b>      |             | <b>?09/12/2014</b>   |  |  |            |            |
| <b>L7</b>    |          |          |                                | <b>388</b> | <b>228</b>     |                                 |           | <b>AIH</b>      |             | <b>?09/12/2014</b>   |  |  |            |            |
| L7/H7        | x        | x        |                                | 389        | 229            | 617                             | 23        | P5/2 x 4        | 3000        | 10/12/1976           |  |  | 9          | 3          |
| L7/H7        | x        | x        |                                | 390        | 230 (1)        | 618                             | 27        | P5/2 x 4        | 3000        | 10/12/1976           |  |  | 7          | 3          |
| L7/H7        | x        |          |                                | 391        | 57(5)          | 619                             | 34        | P5/2 x 4        | 3000        | 10/12/1976           |  |  | 5          | 2          |
| <b>L7/H7</b> | <b>x</b> | <b>x</b> |                                | <b>392</b> | <b>213 (2)</b> | <b>620</b>                      | <b>27</b> | <b>P5/2 x 4</b> | <b>3000</b> | <b>x</b>             |  |  | <b>0</b>   | <b>x</b>   |
| L7/H7        | x        |          |                                | 393        | 231            | 621                             | 30        | P5/2 x 4        | 5000        | 13/12/1976           |  |  | 6          | 3          |
| <b>L7/H7</b> | <b>x</b> | <b>x</b> |                                | <b>394</b> | <b>232 (1)</b> | <b>622</b>                      | <b>35</b> | <b>P5/2 x 4</b> | <b>5000</b> | <b>14/12/1976</b>    |  |  | <b>x</b>   | <b>x</b>   |
| L7/H7        | x        | x        |                                | 395        | 186 (2)        | 623                             | 29        | P5/2 x 4        | 5000        | 14/12/1976           |  |  | 7          | 7          |
| L7/H7        | x        | x        |                                | 396        | 233            | 624                             | 27        | P5/2 x 4        | 5000        | 17/12/1976           |  |  | 2          | 1          |
| L7/H7        | x        |          |                                | 397        | 234 (1)        | 625                             | 35        | P5/2 x 4        | 5000        | 17/12/1976           |  |  | 3          | 3          |
|              |          |          |                                |            |                |                                 |           |                 |             | <b>52 lap</b>        |  |  | <b>314</b> | <b>149</b> |
|              |          |          | <b>58 procedures</b>           |            |                |                                 |           |                 |             |                      |  |  |            |            |
|              |          |          |                                |            |                | <b>55 LORs</b>                  |           |                 |             |                      |  |  |            |            |
|              |          |          | <b>48 outcomes</b>             |            |                | <b>1 lap sterilization</b>      |           |                 |             |                      |  |  |            |            |
|              |          |          | 314 follicles (incl. L497)     |            |                | <b>2 AIH</b>                    |           |                 |             | <b>Media changes</b> |  |  |            |            |
|              |          |          | 149 eggs (incl. L497)          |            |                | <b>4 cancelled</b>              |           |                 |             | Earles Fert          |  |  |            |            |
|              |          |          | 4 no eggs                      |            |                | <b>3 ovaries not accessible</b> |           |                 |             | Earles Hep           |  |  |            |            |
|              |          |          | 44 inseminations               |            |                |                                 |           |                 |             | Earles Alb           |  |  |            |            |

|  |  |  |                                  |  |  |  |  |  |  |                          |           |  |  |
|--|--|--|----------------------------------|--|--|--|--|--|--|--------------------------|-----------|--|--|
|  |  |  | 29 with embryos                  |  |  |  |  |  |  | F10: Ca, Mg, Bicarb, Pen |           |  |  |
|  |  |  | 27 ETs                           |  |  |  |  |  |  | F10 Cleavage             | no bicarb |  |  |
|  |  |  | <b>1 ? Biochemical pg (L612)</b> |  |  |  |  |  |  | F10 Transfer             | 0.36% BSA |  |  |
|  |  |  | <b>8 ?EPL?</b>                   |  |  |  |  |  |  |                          |           |  |  |

| Q                                                                        | R         | S                                      | T                       |
|--------------------------------------------------------------------------|-----------|----------------------------------------|-------------------------|
| Outcome/comments                                                         | ET no.    | Media/comments                         | Monitoring              |
| Morula ET 2.45 D5                                                        | 34        | Earles/F10/20%HS; GC cultures          | daily, urines           |
| <i>no eggs</i>                                                           |           |                                        |                         |
| MII, ?2PB                                                                |           |                                        |                         |
| v. nice blasto ET 10am D5                                                | 35        |                                        |                         |
| <i>no eggs</i>                                                           |           |                                        |                         |
| MII 1PB                                                                  |           |                                        |                         |
| <i>5-6c but looking unwell</i>                                           |           |                                        |                         |
| GV                                                                       |           |                                        |                         |
| <b>E2 too low - cancelled</b>                                            |           | <b>No lap</b>                          |                         |
| 16-32c - perhaps >32 ET 3-m D5                                           | 36        | cells and cultures                     |                         |
| Morula v nice - ET 6pm D4; GC cultures                                   | 37        | <b>serum not clotted</b> ; GC cultures |                         |
| <b>4 blasto, 2 ET, 2 left in culture - 1 hatched, 1 exp-fixed, photo</b> | <b>38</b> | <b>Fresh F10, o extra Ca &amp; Mg</b>  |                         |
| did not cleave                                                           |           |                                        |                         |
| v nice morula, 32c, not stripey ET D4 7.30pm                             | 39        |                                        |                         |
| stripy morula ET D4 10pm                                                 | 40        |                                        |                         |
| <b>2ET: stripy morula + early blasto 10.30pm D4</b>                      | <b>41</b> |                                        |                         |
| no cleavage                                                              |           | Serum new method                       |                         |
| 2 blasto ET D5 - 1 left, early blasto D6,7,8                             | 42        | GC cultures inact serum                |                         |
| <b>32c, ET 11 am D5</b>                                                  | <b>43</b> | <b>serum new method GC etc</b>         |                         |
| 16-32c, ET 11.30am D5                                                    | 44        | GC cultures                            |                         |
| all 1-c; follicular cells fixed                                          |           |                                        |                         |
| <b>early blasto ET 1pm D5</b>                                            | <b>45</b> | <b>GC cultures, fixed</b>              |                         |
| early blasto ET 8am D5                                                   | 46        |                                        |                         |
| Blastocyst ET 12.45 D5                                                   | 47        | GC cultures, fixed                     |                         |
| <b>nothing recorded (Sterilization)</b>                                  |           |                                        |                         |
| <b>raspberry' - stripey ET 9.45pm D4</b>                                 | <b>48</b> | <b>GC cultures, fixed</b>              |                         |
| <i>ovary covered in bowel - no eggs; surgical emphysema</i>              |           |                                        |                         |
| <b>blastocyst ET 6.45 D5</b>                                             | <b>49</b> | <b>GC cultures</b>                     |                         |
| <b>Blastocyst ET 7.30 D5</b>                                             | <b>50</b> |                                        | <b>daily monitoring</b> |
| <b>poor response - not done</b>                                          |           |                                        |                         |
| stained: MII 1PB                                                         |           |                                        |                         |
| 8c, 16c ET 11.30pm D4                                                    | 51        |                                        |                         |

|                                                                    |           |                                               |                        |
|--------------------------------------------------------------------|-----------|-----------------------------------------------|------------------------|
| MII 1PB, no cleavage                                               |           |                                               |                        |
| GV, MII 1PB - no cleavage                                          |           |                                               |                        |
| 1 stripey, 1 raspberry p v. nice both ET via lapD4                 | 52        |                                               |                        |
| early blasto, ET 6.45pm D4                                         | 53        | FF + cells                                    |                        |
| <b>Refused laparoscopy</b>                                         |           |                                               |                        |
| <b>morula/blast - v nice Trans by lap D4</b>                       | <b>54</b> | <b>GC cultures inact serum/FF</b>             | <b>Bloods, inc Pri</b> |
| <b>5 embryos; 2x M/EB trans by lap D4; 2 sent to A.McL, London</b> | <b>55</b> | <b>GC cultures inact serum/FF</b>             | <b>Bloods, inc Pri</b> |
| <i>1x2c, 1 crumpled - no ET</i>                                    |           |                                               | No bloods              |
| <i>no eggs</i>                                                     |           |                                               | 1 blood                |
| no cleavage                                                        |           | GC cultures inact serum/FF                    | No bloods              |
| <b>1x 8c, v nice - ET D3</b>                                       | <b>56</b> | <b>GC cultures inact serum/FF</b>             | <b>Bloods, inc Pri</b> |
| no cleavage                                                        |           |                                               | No bloods              |
| <b>ovary not accessible</b>                                        |           |                                               | <b>No bloods</b>       |
| all 1-c, MII 1PB                                                   |           | serum not inactivated                         | 1 blood                |
| 8-16c, M/EB - both ET D4                                           | 57        | serum clotted as whole blood FF               | 2 bloods               |
|                                                                    |           |                                               |                        |
| 2x blast (beauty) ET D4                                            | 58        | Serum inactivated + not inactivated/FF        | 4 bloods               |
| 1-c, no cleavage                                                   |           | Serum inactivated + not inactivated/FF        | 1 blood                |
| Morula ET D4                                                       | 59        | Serum inactivated + not inactivated/FF        | 3 bloods               |
| <b>cancelled</b>                                                   |           | <b>Serum inactivated + not inactivated/FF</b> | <b>No bloods</b>       |
| 1-c - no cleavage                                                  |           | Serum inactivated + not inactivated/FF        | 1 blood                |
| <b>ovaries not accessible</b>                                      |           | <b>Serum inactivated + not inactivated/FF</b> | <b>1 blood</b>         |
| no cleavage - stained 6MII 1PB, 1 lost                             |           | Serum inactivated + not inactivated/FF        | 1 blood                |
| Early morula ET D3 9pm                                             | 60        |                                               | 6 bloods               |
| no cleavage - 1GV, 2 MII 1PB                                       |           |                                               | 1 blood                |
|                                                                    |           |                                               |                        |
|                                                                    |           |                                               |                        |
|                                                                    |           |                                               |                        |
|                                                                    |           |                                               |                        |
|                                                                    |           |                                               |                        |
|                                                                    |           |                                               |                        |
|                                                                    |           |                                               |                        |
|                                                                    |           |                                               |                        |











| A            | B        | C        | D                     | E          | F               | G           | H         | I                     | J             | K                 | L   | M            | N        |
|--------------|----------|----------|-----------------------|------------|-----------------|-------------|-----------|-----------------------|---------------|-------------------|-----|--------------|----------|
| Book         | FF       | Notes    | Churchill             | Numb       | P-Code          | L No        | Age       | Stim                  | hCG           | Lap Date          |     | hCG-OCR      | Folls    |
| <b>L7/H7</b> | <b>x</b> |          |                       | <b>398</b> | <b>235</b>      | <b>626</b>  | <b>NR</b> | <b>P3x6, Parlodel</b> | <b>5000</b>   | <b>cancelled</b>  |     |              | <b>x</b> |
| L7/H7        | x        | x        |                       | 399        | 236 (1)         | 627         | 27        | P5x3                  | 5000          | 14/02/1977        |     | 32           | 7        |
| L7/H7        | x        | x        |                       | 400        | 178 (2)         | 628         | 30        | P5x3, Parlodel        | 5000          | 14/02/1977        |     | 32.25        | 8        |
| L7/H7        | x        | x        |                       | 401        | 237 (1)         | 629         | 34        | P5x3                  | 5000          | 16/02/1977        |     | 32.5         | 6        |
| <b>L7/H7</b> | <b>x</b> |          |                       | <b>402</b> | <b>238</b>      | <b>630</b>  | <b>NR</b> | <b>P5x3</b>           | <b>5000</b>   | <b>cancelled</b>  |     |              | <b>x</b> |
| <b>L7/H7</b> | <b>x</b> |          |                       | <b>403</b> | <b>239</b>      | <b>631</b>  | <b>NR</b> | <b>NR</b>             |               | <b>cancelled</b>  |     |              | <b>x</b> |
| <b>L7/H7</b> | <b>x</b> |          |                       | <b>404</b> | <b>240</b>      | <b>632</b>  | <b>NR</b> | <b>P4 x 2</b>         | <b>5000</b>   | <b>cancelled</b>  |     |              | <b>x</b> |
| <b>L7/H7</b> | <b>x</b> |          |                       | <b>405</b> | <b>241</b>      | <b>633</b>  | <b>NR</b> | <b>NR</b>             |               | <b>cancelled</b>  |     |              | <b>x</b> |
| <b>L7/H7</b> | <b>x</b> |          |                       | <b>406</b> | <b>242</b>      | <b>634</b>  | <b>NR</b> | <b>P4 x 3</b>         | <b>5000</b>   | <b>cancelled</b>  |     |              |          |
| L7/H7        | x        | x        |                       | 407        | 38 (7)          | 635         | 36        | P5x3, Parlodel        | 5000          | 21/02/1977        |     | 32           | 8        |
| L7/H7        | x        | x        |                       | 408        | 243             | 636         | 35        | P5x3, Parlodel        | 5000          | 22/02/1977        |     | 32           | 4        |
| L7/H7        | x        | x        |                       | 409        | 244             | 637         | 35        | P5x3, Parlodel        | 5000          | 21/02/1977        |     | 32.25        | 7        |
| L7/H7        | x        | x        |                       | 410        | 245             | 638         | 30        | P5x3, Parlodel        | 5000          | 22/02/1977        | ?32 |              | 1        |
| L7/H7        | x        | x        |                       | 411        | 246             | 639         | 38        | P5x3, Parlodel        | 5000          | 23/02/1977        |     |              | 4        |
| <b>L7/H7</b> | <b>x</b> | <b>x</b> |                       | <b>412</b> | <b>*247 (1)</b> | <b>640</b>  | <b>31</b> | <b>P5x3, Parlodel</b> | <b>5000</b>   | <b>23/02/1977</b> |     | <b>32.25</b> | <b>8</b> |
| <b>L5</b>    | <b>x</b> |          |                       | <b>413</b> | <b>248</b>      | <b>641</b>  | <b>35</b> | <b>P5x3, Parlodel</b> |               | <b>cancelled</b>  |     |              | <b>x</b> |
| L7/H7        | x        | x        | Folder 11, EB secreto | 414        | 249             | 642         | 25        | P5x3                  | MRC LH        | 16/03/1977        |     | 32.5         | 10       |
| <b>L7/H7</b> | <b>x</b> |          |                       | <b>415</b> | 222 (2)         | <b>643A</b> | <b>32</b> | <b>P5x4</b>           | <b>MRC LH</b> | <b>cancelled</b>  |     |              | <b>x</b> |
| L7/H7        | x        | x        |                       | 416        | 220 (2)         | 643         | 36        | P5x3                  | 5000          | 22/03/1977        |     |              | 7        |
| L7/H7        | x        | x        |                       | 417        | 152 (2)         | 644         | 37        | P5x3                  | 5000          | 22/03/1977        |     |              | 8        |
| <b>L7/H7</b> | <b>x</b> |          |                       | <b>418</b> | <b>250</b>      | <b>645</b>  | <b>29</b> | <b>P5/3x4,Parlode</b> | <b>5000</b>   | <b>cancelled</b>  |     |              | <b>x</b> |
| L7/H7        |          |          |                       | 419        | 230 (2)         | 646         | 27        | P5x3,Harmogen         | 5000          | 23/06/1977        |     | 32.75        | 9        |
| L7/H7        |          |          |                       | 420        | 225             | 647         | 35        | P5x3,Harmogen         | 5000          | 24/06/1977        |     | 32.25        | 8        |
| L7/H7        |          |          |                       | 421        | 141 (2)         | 648         | 32        | P5x3 Parlodel         | 5000          | 27/06/1977        |     | 32           | 8        |
| L7/H7        |          |          |                       | 422        | 251             | 649         | 31        | P5x3 Parlodel         | 5000          | 27/06/1977        |     |              | 1        |
| L7/H7        |          |          |                       | 423        | 252             | 650         | 32        | P5x3 Parlodel         | 5000          | 27/06/1977        |     |              | 10       |
| L7/H7        |          |          |                       | 424        | 203 (2)         | 651         | 38        | P5x3,Harmogen         | 5000          | 01/07/1977        |     |              | 3        |
| L7/H7        |          |          |                       | 425        | 178 (3)         | 652         | 31        | P5x3 Parlodel         | 5000          | 01/07/1977        |     |              | 9        |
| L7/H7        |          |          |                       | 426        | 209 (2)         | 653         | 28        | P5x3,Harmogen         | 5000          | 01/07/1977        |     |              | 11       |
| L7/H7        |          |          |                       | 427        | 253             | 654         | 31        | P5x4                  | 5000          | 02/07/1977        |     |              | 6        |
| <b>L7/H7</b> |          |          |                       | <b>428</b> | <b>254 (1)</b>  | <b>655</b>  | <b>31</b> | <b>P5/3x4</b>         | <b>5000</b>   | <b>cancelled</b>  |     |              | <b>x</b> |
| L7/H7        |          |          |                       | 429        | 229 (2)         | 656         | 24        | P5x3 Parlodel         | 5000          | 04/07/1977        |     |              | 11       |



| O    | P     | Q                                                   | R      | S                                                 | T                |
|------|-------|-----------------------------------------------------|--------|---------------------------------------------------|------------------|
| eggs | insem | Outcome/comment                                     | ET no. | Media/comment                                     | blood monitorin  |
| x    |       | <b>Timed intercourse</b>                            |        | <b>serum not inactivated</b>                      | <b>x4</b>        |
| 3    |       | no cleavage; new aspirator, larger needle           |        | Earles F, E-H, E-BSA, ,F10+15%HS                  | 4                |
| 0    |       | no eggs                                             |        |                                                   | 3                |
| 4    |       | 2x8c, ET D2; 1x early blasto, did not expand        | 61     |                                                   | 6                |
| x    |       | <b>Cancelled</b>                                    |        |                                                   | <b>5</b>         |
| x    |       | <b>Cancelled</b>                                    |        |                                                   |                  |
| x    |       | <b>Cancelled</b>                                    |        |                                                   | <b>6</b>         |
| x    |       | <b>Cancelled</b>                                    |        |                                                   | <b>1</b>         |
| x    |       | <b>Cancelled</b>                                    |        |                                                   | <b>4</b>         |
| 3    |       | 1x Morula, ET D4                                    | 62     |                                                   | 8                |
| 1    |       | egg lost at 7pm'                                    |        | serum not inact/ + post laparoscopy               | 10               |
| 7    |       | 3 morulae, beauties ET D4                           | 63     |                                                   | 9                |
| 0    |       | no eggs                                             |        |                                                   | 6                |
| 2    |       | GVs, no PB seen                                     |        |                                                   | 6                |
| 2    |       | 1x8c, beauty, ET D3; other one MII 1PB,             | 64     |                                                   | 8                |
| x    |       | patient cancelled                                   |        | cancelled by patient                              | 4                |
| 2    |       | 1x8-16c found D7 (not gassed & in the cold)         |        |                                                   | 6                |
| x    |       | <b>Cancelled</b>                                    |        |                                                   | <b>7</b>         |
| 5    |       | 8-16c, 8c egg in tube, ET D3                        | 65     | mass of cells good for culture frozen immediately | 13               |
| 4    |       | 1 egg fixed for EM, non-ov. 1x nice 8c ET D 3       | 66     |                                                   | 13               |
| x    |       | <b>Cancelled; poor response</b>                     |        |                                                   | <b>3</b>         |
| 1    |       | 2c; no further cleavage; uterine scrapings          |        | No pen in medium (Earles 10% HS)                  | 8                |
| 4    |       | eggs in tube; 1x8c ET D3                            | 67     |                                                   | 9                |
| 9    |       | ET D3. 8c + ; surplus frozen, 2x cleaving mor       | 68     |                                                   | 8                |
| 0    |       | fluid saved, spun - fixed for EM; endometr biopsies |        |                                                   | 6                |
| 6    |       | 3 transferred, 4-8c -D2; 1c fixed for EM            | 69     |                                                   | 6                |
| 0    |       | no eggies found                                     |        |                                                   | every 2 d        |
| 6    |       | 8c ET D4 9.15am                                     | 70     |                                                   | every 2 d        |
| 3    |       | all 1c                                              |        |                                                   | every 2 d        |
| 3    |       | 1-c; frozen, I fragmented - EM                      |        |                                                   | every 2 d        |
| x    |       | <b>cancelled - E2 too low</b>                       |        |                                                   | <b>every 2 d</b> |
| 8    |       | extra one found, fixed - EM 2x16c ET D3             | 71     |                                                   | every 2 d        |



| U                                                                | V | W   | X | Y | Z |
|------------------------------------------------------------------|---|-----|---|---|---|
| <b>comments</b>                                                  |   | RTM |   |   |   |
|                                                                  |   |     |   |   |   |
|                                                                  |   |     |   |   |   |
| degenerated D8                                                   |   |     |   |   |   |
|                                                                  |   |     |   |   |   |
|                                                                  |   |     |   |   |   |
|                                                                  |   |     |   |   |   |
|                                                                  |   |     |   |   |   |
|                                                                  |   |     |   |   |   |
|                                                                  |   |     |   |   |   |
|                                                                  |   |     |   |   |   |
|                                                                  |   |     |   |   |   |
| <b>Alastair born January 1979 - not this cycle</b>               |   |     |   |   |   |
|                                                                  |   |     |   |   |   |
|                                                                  |   |     |   |   |   |
|                                                                  |   |     |   |   |   |
| Epidural                                                         |   |     |   |   |   |
|                                                                  |   |     |   |   |   |
| endometrial biopsy taken; expts with cells                       |   |     |   |   |   |
| expts with cells                                                 |   |     |   |   |   |
| insem under paraffin, then transf to tubes                       |   |     |   |   |   |
| <b>Cells labelled with <sup>3</sup>H Leucine - to Azim</b>       |   |     |   |   |   |
|                                                                  |   |     |   |   |   |
|                                                                  |   |     |   |   |   |
|                                                                  |   |     |   |   |   |
| <b>EB + <sup>3</sup>HLeucine - cultured 30 mins &amp; frozen</b> |   |     |   |   |   |
| GC cultures;expts with cells                                     |   |     |   |   |   |
|                                                                  |   |     |   |   |   |
| GC cultures;expts with cells                                     |   |     |   |   |   |





| A            | B     | C  | D                    | E          | F              | G          | H         | I             | J           | K                 | L        | M                | N        | O        | P    |
|--------------|-------|----|----------------------|------------|----------------|------------|-----------|---------------|-------------|-------------------|----------|------------------|----------|----------|------|
| Book         | Notes | FF | Churchill            | Numb       | P-Code         | L No       | Age       | Stim          | Dose        | Lap Date          |          | surge - OCR      | folfs    | eggs     | Ins. |
| H7/L7        |       |    | Folder 8             | 441        | 265 (1)        | 668        | 35        | NC/ HG        |             | 01/01/1978        |          |                  | 1        | 0        |      |
| H7/L7        |       |    |                      | 442        | 256 (2)        | 669        | 34        | NC/ HG        |             | 03/01/1978        |          |                  | 0        | 0        |      |
| <b>H8/L8</b> |       |    |                      | <b>443</b> | <b>230 (3)</b> | <b>670</b> | <b>30</b> | <b>NC/ HG</b> |             | <b>cancelled</b>  |          |                  | <b>x</b> | <b>x</b> |      |
| H8/L8        |       |    |                      | 444        | 258 (2)        | 671        | NR        | NC/ HG        |             | 08/01/1978        |          | 34               | 5        | 1        |      |
| H8/L8        |       |    |                      | 445        | 266            | 672        | NR        | NC/ HG        |             | 08/01/1978        |          | 30               | 2        | 0        |      |
| <b>H8/L8</b> |       |    |                      | <b>446</b> | <b>267</b>     | <b>673</b> | <b>NR</b> | <b>NC/ HG</b> |             | <b>14/01/1978</b> |          | <b>25.5-28.5</b> | <b>2</b> | <b>1</b> |      |
| H8/L8        |       |    | Folder 9 (envelope)  | 447        | 268 (1)        | 674        | NR        | NC/ HG        |             | 12/01/1978        |          | 34.5             | 3        | 1        |      |
| H8/L8        |       |    | Folder 8             | 448        | 269 (1)        | 675        | 25        | NC/ HG        |             | 13/01/1978        |          | 23               | 3        | 1        |      |
| H8/L8        |       |    |                      | 449        | 270            | 676        | NR        | NC/ HG        |             | 13/01/1978        |          | 30               | 4        | 0        |      |
| <b>H8/L8</b> |       |    |                      | <b>450</b> | <b>271</b>     | <b>677</b> | <b>NR</b> | <b>P5x4</b>   | <b>5000</b> | <b>13/01/1978</b> |          | <b>32.5</b>      | <b>6</b> | <b>1</b> |      |
| H8/L8        |       |    |                      | 451        | 178 (3)        | 678        | 31        | NC/ HG        |             | 20/01/1978        |          | 28               | 2        | 1        |      |
| H8/L8        |       |    | Folder 9 (envelope)  | 452        | 145 (2)        | 679        | 28        | NC/ HG        |             | 19/01/1978        |          | 24               | 2        | 1        |      |
| <b>H8/L8</b> |       |    |                      | <b>453</b> | <b>232 (2)</b> | <b>680</b> | <b>37</b> | <b>NC/ HG</b> |             | <b>18/01/1978</b> |          |                  | <b>0</b> | <b>0</b> |      |
| H8/L8        |       |    |                      | 454        | 272 (1)        | 681        | NR        | NC/ HG        |             | 23/01/1978        |          | 19               | 2        | 1        |      |
| <b>H8/L8</b> |       |    |                      | <b>455</b> | 213 (3)        | <b>682</b> | <b>29</b> | <b>NC/ HG</b> |             | <b>14/02/1978</b> | <b>x</b> |                  | <b>0</b> | <b>0</b> |      |
| L5           | x     |    |                      | 456        | 273            | 683        | NR        | NC/ HG        |             | 14/02/1978        |          | 27-30            | 2        | 1        |      |
| H8/L8        |       |    |                      | 457        | 274 (1)        | 684        | NR        | NC/ HG        |             | 14/02/1978        |          | 27-29            | 2        | 1        |      |
| H8/L8        |       |    | Folder 8             | 458        | 275 (1)        | 685        | 28        | NC/ HG        |             | 14/02/1978        |          | 24-26.5          | 5        | 2        |      |
| H8/L8        |       |    |                      | 459        | 263 (2)        | 686        | 27        | NC/ HG        |             | 15/02/1978        |          | 16.5             | 2        | 1        |      |
| <b>H8/L8</b> |       |    |                      | <b>460</b> | <b>276</b>     | <b>687</b> | <b>NR</b> | <b>NC/ HG</b> |             | <b>cancelled</b>  |          | <b>No surge</b>  | <b>x</b> | <b>x</b> |      |
| H8/L8        |       |    |                      | 461        | 277            | 688        | NR        | NC/ HG        |             | 18/02/1978        |          |                  | 4        | 0        |      |
| H8/L8        |       |    | Folder 11 (envelope) | 462        | 278            | 689        |           | NC/ HG        |             | 23/02/1978        |          | 19               | 2        | 1        |      |
| H8/L8        |       |    | Folder 8             | 463        | 279            | 690        | 26        | NC/ HG        |             | 20/02/1978        |          | 18.75            | 1        | 1        |      |
| H8/L8        |       |    |                      | 464        | 280            | 691        | NR        | NC/ HG        |             | 21/02/1978        |          | 18               | 1        | 1        |      |
| H8/L8        |       |    |                      | 465        | 281            | 692        | NR        | NC/ HG        |             | 21/02/1978        |          | 23 (too early)   | 1        | 1        |      |
| <b>H8/L8</b> |       |    |                      | <b>466</b> | <b>282 (1)</b> | <b>693</b> | <b>NR</b> | <b>NC/ HG</b> |             | <b>cancelled</b>  |          |                  | <b>x</b> | <b>x</b> |      |
| H8/L8        |       |    |                      | 467        | 75 (3)         | 694        | 38        | NC/ HG        |             | 23/02/1978        |          | 24.5             | 0        | 0        |      |
| <b>H8/L8</b> |       |    |                      | <b>468</b> | <b>283</b>     | <b>695</b> | <b>NR</b> | <b>P5x3</b>   | <b>5000</b> | <b>23/02/1978</b> |          |                  | <b>4</b> | <b>3</b> |      |
| H8/L8        |       |    |                      | 469        | 38 (8)         | 696        | 37        | NC/ HG        |             | 26/02/1978        |          | 22.5             | 1        | 1        |      |
| H8/L8        |       |    |                      | 470        | 265 (2)        | 697        | 35        | NC/ HG        |             | 22/02/1978        |          |                  | 1        | 1        |      |
| H8/L8        |       |    |                      | 471        | 110 (6)        | 698        | 35        | NC/ HG        |             | 24/02/1978        |          | 24-27            | 1        | 1        |      |
| <b>H8/L8</b> |       |    |                      | <b>472</b> | <b>284</b>     | <b>699</b> | <b>NR</b> | <b>NC/ HG</b> |             | <b>cancelled</b>  |          | <b>x</b>         | <b>x</b> | <b>x</b> |      |

|              |  |                          |            |                |            |           |               |  |                   |  |                 |          |          |
|--------------|--|--------------------------|------------|----------------|------------|-----------|---------------|--|-------------------|--|-----------------|----------|----------|
| H8/L8        |  | Folder 8                 | 473        | 190 (2)        | 700        | 40        | NC/ HG        |  | 24/02/1978        |  | 20-23           | 1        | 1        |
| H8/L8        |  | Folder 8, Folder 11      | 474        | 285            | 701        | NR        | NC/ HG        |  | 25/02/1978        |  | 21-24           | 1        | 1        |
| <b>H8/L8</b> |  |                          | <b>475</b> | <b>286</b>     | <b>702</b> | <b>NR</b> | <b>NC/ HG</b> |  | <b>cancelled</b>  |  | <b>x</b>        | <b>x</b> | <b>x</b> |
| H8/L8        |  | Folder 8                 | 476        | 254 (2)        | 703        | 32        | NC/ HG        |  | 06/04/1978        |  |                 | 1        | 1        |
| H8/L8        |  |                          | 477        | 275 (2)        | 704        | 28        | NC/ HG        |  | 06/04/1978        |  |                 | 2        | 1        |
| <b>H8/L8</b> |  | <b>Folder 8</b>          | <b>478</b> | <b>269 (2)</b> | <b>705</b> | <b>25</b> | <b>NC/ HG</b> |  | <b>cancelled</b>  |  | <b>x</b>        | <b>x</b> | <b>x</b> |
| H8/L8        |  |                          | 479        | 287            | 706        | NR        | NC/ HG        |  | 10/04/1978        |  |                 | 1        | 1        |
| H8/L8        |  |                          | 480        | 132 (2)        | 707        | 34        | NC/ HG        |  | 09/04/1978        |  |                 | 1        | 0        |
| H8/L8        |  | Folder 9 (envelope)      | 481        | 274 (2)        | 708        | NR        | NC/ HG        |  | 08/04/1978        |  |                 | 2        | 1        |
| H8/L8        |  | Folder 9 (envelope)      | 482        | 288 (1)        | 709        | NR        | NC/ HG        |  | 10/04/1978        |  |                 | 2        | 1        |
| H8/L8        |  |                          | 483        | 236 (2)        | 710        | 28        | NC/ HG        |  | 10/04/1978        |  |                 | 3        | 1        |
| <b>H8/L8</b> |  | <b>Folder 8</b>          | <b>484</b> | <b>234 (2)</b> | <b>711</b> | <b>37</b> | <b>NC/ HG</b> |  | <b>cancelled</b>  |  | <b>x</b>        | <b>x</b> | <b>x</b> |
| <b>H8/L8</b> |  | <b>Folder 8</b>          | <b>485</b> | <b>**247 (</b> | <b>712</b> | <b>32</b> | <b>NC/ HG</b> |  | <b>20/05/1978</b> |  |                 | <b>1</b> | <b>1</b> |
| H8/L8        |  | Folder 8, Folder 11      | 486        | 289            | 713        | 34        | NC/ HG        |  | 20/05/1978        |  |                 | 4        | 1        |
| H8/L8        |  | Folder 8                 | 487        | 38 (9)         | 714        | 38        | NC/ HG        |  | 20/05/1978        |  |                 | 1        | 1        |
| H8/L8        |  | Folder 8                 | 488        | 228 (2)        | 715        | 34        | NC/ HG        |  | 24/05/1978        |  |                 | 1        | 1        |
| H8/L8        |  | Folder 8                 | 489        | 263 (3)        | 716        | 28        | NC/ HG        |  | 22/05/1978        |  |                 | 1        | 1        |
| H8/L8        |  |                          | 490        | 290            | 717        | NR        | NC/ HG        |  | 23/05/1978        |  |                 | 2        | 2        |
| H8/L8        |  |                          | 491        | 147 (2)        | 718        | 31        | NC/ HG        |  | 24/05/1978        |  |                 | 1        | 1        |
| H8/L8        |  | Folder 8                 | 492        | 291            | 719        | 31        | NC/ HG        |  | 24/05/1978        |  |                 | 1        | 1        |
| H8/L8        |  | Folder 9 (envelope)      | 493        | 292 (1)        | 720        | NR        | NC/ HG        |  | 29/05/1978        |  |                 | 1        | 0        |
| H8/L8        |  |                          | 494        | 265 (2)        | 721        | NR        | NC/ HG        |  | 30/05/1978        |  |                 | 1        | 1        |
| H8/L8        |  |                          | 495        | 293 (1)        | 722        | NR        | NC/ HG        |  | 31/05/1978        |  |                 | 1        | 1        |
| H8/L8        |  |                          | 496        | 294            | 723        | NR        | NC/ HG        |  | 31/05/1978        |  |                 | 1        | 0        |
| H8/L8        |  |                          | 497        | 295 (1)        | 724        | NR        | NC/ HG        |  | 02/06/1978        |  |                 | 1        | 1        |
| H8/L8        |  |                          | 498        | 274 (3)        | 725        | NR        | NC/ HG        |  | 02/06/1978        |  |                 | 1        | 1        |
| <b>H8/L8</b> |  | <b>Folder 9 (envelop</b> | <b>499</b> | <b>288 (2)</b> | <b>726</b> | <b>NR</b> | <b>NC/ HG</b> |  | <b>cancelled</b>  |  | <b>missed S</b> | <b>x</b> | <b>x</b> |
| H8/L8        |  | Folder 8                 | 500        | 145 (3)        | 727        | 28        | NC/ HG        |  | 03/06/1978        |  |                 | 1        | 1        |
| H8/L8        |  | Folder 9 (envelope)      | 501        | 257 (2)        | 728        | 37        | NC/ HG        |  | 31/5/78           |  |                 | 1        | 1        |
| H8/L8        |  | Folder 8, Folder 9 (     | 502        | 296            | 729        | 30        | NC/ HG        |  | 01/06/1978        |  |                 | 1        | 1        |
| <b>H8/L8</b> |  | <b>Folder 9 (envelop</b> | <b>503</b> | <b>272 (2)</b> | <b>730</b> | <b>NR</b> | <b>NC/ HG</b> |  | <b>cancelled</b>  |  | <b>no surge</b> | <b>x</b> | <b>x</b> |
| H8/L8        |  | Folder 8                 | 504        | 237 (2)        | 731        | 36        | NC/ HG        |  | 02/06/1978        |  |                 | 2        | 1        |
| <b>H9/L9</b> |  |                          | <b>505</b> | <b>262 (2)</b> | <b>732</b> | <b>NR</b> | <b>NC/ HG</b> |  | <b>cancelled</b>  |  | <b>missed S</b> | <b>x</b> | <b>x</b> |
| H9/L9        |  |                          | 506        | 297            | 733        | NR        | NC/ HG        |  | 05/07/1978        |  | 11.12pm         | 1        | 1        |

|              |  |  |                          |            |                                 |            |           |               |  |                   |  |                 |          |          |  |  |
|--------------|--|--|--------------------------|------------|---------------------------------|------------|-----------|---------------|--|-------------------|--|-----------------|----------|----------|--|--|
| <b>H9/L9</b> |  |  |                          | <b>507</b> | <b>295 (2)</b>                  | <b>734</b> | <b>NR</b> | <b>NC/ HG</b> |  | <b>cancelled</b>  |  | <b>missed S</b> | <b>x</b> | <b>x</b> |  |  |
| H9/L9        |  |  |                          | 508        | 298                             | 735        | NR        | NC/ HG        |  | 06/07/1978        |  |                 | 1        | 1        |  |  |
| H9/L9        |  |  |                          | 509        | 299                             | 736        | NR        | NC/ HG        |  | 02/07/1978        |  |                 | 2        | 2        |  |  |
| H9/L9        |  |  |                          | 510        | 279 (2)                         | 737        | NR        | NC/ HG        |  | 05/07/1978        |  | 28.75           | 1        | 1        |  |  |
| <b>H9/L9</b> |  |  | <b>Folder 9 (envelop</b> | <b>511</b> | <b>268 (2)</b>                  | <b>738</b> | <b>NR</b> | <b>NC/ HG</b> |  | <b>16/07/1978</b> |  |                 | <b>1</b> | <b>1</b> |  |  |
| H9/L9        |  |  |                          | 512        | 292(2)                          | 739        | NR        | NC/ HG        |  | 22/07/1978        |  | 15-18 (12mr     | 1        | 1        |  |  |
| H9/L9        |  |  |                          | 513        | 300                             | 740        | NR        | NC/ HG        |  | 20/07/1978        |  |                 | 2        | 2        |  |  |
| H9/L9        |  |  | Folder 8                 | 514        | 301                             | 741        | 33        | NC/ HG        |  | 21/07/1978        |  |                 | 1        | 1        |  |  |
| <b>H9/L9</b> |  |  |                          | <b>515</b> | <b>302</b>                      | <b>742</b> | <b>NR</b> | <b>NC/ HG</b> |  | <b>cancelled</b>  |  |                 | <b>x</b> | <b>x</b> |  |  |
| H9/L9        |  |  |                          | 516        | 38 (10)                         | 743        | 37        | NC/ HG        |  | 18/07/1978        |  |                 | 1        | 1        |  |  |
| H9/L9        |  |  | Folder 8                 | 517        | 295 (3)                         | 744        | 34        | NC/ HG        |  | 28/07/1978        |  |                 | 1        | 0        |  |  |
| H9/L9        |  |  |                          | 518        | 303                             | 745        | NR        | NC/ HG        |  | 01/08/1978        |  | 8.45pm          | 2        | 1        |  |  |
| H9/L9        |  |  |                          | 519        | 293 (2)                         | 746        | NR        | NC/ HG        |  | 28/07/1978        |  |                 | 1        | 1        |  |  |
| <b>H9/L9</b> |  |  |                          | <b>520</b> | <b>48 (3)</b>                   | <b>747</b> | <b>NR</b> | <b>NC/ HG</b> |  | <b>cancelled</b>  |  | <b>missed S</b> | <b>x</b> | <b>x</b> |  |  |
|              |  |  |                          |            | P247* =Grace Montgomery         |            |           |               |  |                   |  |                 |          |          |  |  |
|              |  |  | <b>80 procedures</b>     |            |                                 |            |           |               |  |                   |  |                 |          |          |  |  |
|              |  |  |                          |            | <b>78 LORs</b>                  |            |           |               |  |                   |  |                 |          |          |  |  |
|              |  |  | <b>63 outcomes</b>       |            | <b>2 sterilizations</b>         |            |           |               |  |                   |  |                 |          |          |  |  |
|              |  |  | 111 follicles            |            | <b>13 cancelled</b>             |            |           |               |  |                   |  |                 |          |          |  |  |
|              |  |  | 61 eggs                  |            | <b>2 ovaries not accessible</b> |            |           |               |  |                   |  |                 |          |          |  |  |
|              |  |  | 13 no good eggs          |            |                                 |            |           |               |  |                   |  |                 |          |          |  |  |
|              |  |  | 50 inseminated           |            |                                 |            |           |               |  |                   |  |                 |          |          |  |  |
|              |  |  | 32 with embryos          |            |                                 |            |           |               |  |                   |  |                 |          |          |  |  |
|              |  |  | 31 ET                    |            |                                 |            |           |               |  |                   |  |                 |          |          |  |  |
|              |  |  | <b>1 birth</b>           |            |                                 |            |           |               |  |                   |  |                 |          |          |  |  |
|              |  |  | <b>2 miscarriages</b>    |            |                                 |            |           |               |  |                   |  |                 |          |          |  |  |

| <b>Q</b>                                                                       | <b>R</b>      | <b>S</b>                | <b>T</b>                | <b>U</b>                         | <b>V</b> |
|--------------------------------------------------------------------------------|---------------|-------------------------|-------------------------|----------------------------------|----------|
| <b>Outcome</b>                                                                 | <b>ET no.</b> | <b>Media/comments</b>   | <b>Monitoring/urine</b> | <b>Monitoring/serum</b>          |          |
| missed egg; ?for oocyte donor in future?<br>didn't see ovul. Follicle - no egg |               | E-H, E-F, F10, HS       | 24 hr urines            |                                  |          |
| <b>cancelled</b>                                                               |               |                         |                         | <b>bloods every 2d.</b>          |          |
| no cleavage                                                                    |               |                         | 3hrly urines            |                                  |          |
| no egg                                                                         |               | FF 1 & 3                | 3hrly urines            |                                  |          |
| <b>ET 8c beauty, 10.30pm D2</b>                                                | <b>82</b>     | <b>FF Cell cultures</b> | <b>3hrly urines</b>     |                                  |          |
| ET 8c D3                                                                       | 83            |                         | 3hrly urines            |                                  |          |
| 6c 10.20pm D2                                                                  | 84            | FF cell cultures        | 3hrly urines            | Serum & FF E2 & P                |          |
| no egg                                                                         |               |                         | 3hrly urines            |                                  |          |
| <b>Sterilization -egg fixed</b>                                                |               | <b>FF cell cultures</b> |                         | <b>Expts with cells</b>          |          |
| 16c, fusing - 1pm (D3)                                                         | 85            | FF Cell cultures        | 3hrly urines            |                                  |          |
| 8c, v nice ET 4-5pm (D3)                                                       | 86            | FF Cell cultures        | 3hrly urines            |                                  |          |
| <b>PCS couldn't identify ov/uterus</b>                                         |               |                         |                         |                                  |          |
| ET 4-8c v. nice, D2 10pm                                                       | 87            | FF Cell cultures        | 3hrly urines            | Serum & FF E2 & P                |          |
| <b>ovaries not accessible</b>                                                  |               |                         | <b>3hrly urines</b>     |                                  |          |
| <i>uneven 2c D4, not transf</i>                                                |               |                         | 3hrly urines            | Serum & FF E2 & P                |          |
| 1-c                                                                            |               |                         | 3hrly urines            |                                  |          |
| no cleavage, both 1c                                                           |               |                         | 3hrly urines            |                                  |          |
| 21.00 4-8c D2                                                                  | 88            |                         | 3hrly urines            | Serum & FF E2 & P                |          |
| <b>cancelled</b>                                                               |               |                         |                         |                                  |          |
| no egg                                                                         |               | cell cultures           |                         |                                  |          |
| 1-c Lap too early?                                                             |               | FF Cell cultures        |                         | Serum & FF E2 & P                |          |
| 8.50am D3 4-8c                                                                 | 89            | FF                      |                         | Serum & FF E2 & P                |          |
| D3 1pm beautiful 16c                                                           | 90            |                         |                         |                                  |          |
| no cleavage                                                                    |               | FF Cell cultures        |                         | Serum & FF E2 & P                |          |
| <b>cancelled</b>                                                               |               |                         |                         |                                  |          |
| <b>no egg</b>                                                                  |               | FF Cell cultures        |                         | Serum & FF E2 & P                |          |
| <b>Sterilization</b>                                                           |               | <b>FF Cell cultures</b> |                         | <b>Serum &amp; FF E2 &amp; P</b> |          |
| degenerated                                                                    |               | FF                      |                         | Serum & FF E2 & P                |          |
| D4 3pm 7c v.nice                                                               | 91            |                         |                         |                                  |          |
| no cleavage                                                                    |               | FF Cell cultures        |                         |                                  |          |
| <b>cancelled - missed surge</b>                                                |               |                         |                         | <b>Serum &amp; FF E2 &amp; P</b> |          |

|                                        |           |                       |  |  |                                  |
|----------------------------------------|-----------|-----------------------|--|--|----------------------------------|
| D3 9.20am 8c v.nice                    | 92        | FF                    |  |  |                                  |
| D3 9.30am 8c                           | 93        | FF                    |  |  | Serum & FF E2 & P                |
| <b>cancelled</b>                       |           |                       |  |  | <b>Serum &amp; FF E2 &amp; P</b> |
| no cleavage                            |           |                       |  |  |                                  |
| Surgical ET D3 11.20am;mini-laparotomy | 94        |                       |  |  |                                  |
| <b>cancelled - missed surge</b>        |           |                       |  |  |                                  |
| D3 10.10am 8c beauty                   | 95        |                       |  |  |                                  |
| no egg ? Too late                      |           |                       |  |  |                                  |
| D3 11.40 8c beauty                     | 96        |                       |  |  |                                  |
| no cleavage - mock ET                  |           |                       |  |  |                                  |
| no cleavage - mock ET                  |           |                       |  |  |                                  |
| <b>missed surge - cancelled</b>        |           |                       |  |  |                                  |
| <b>v.nice 8c++ 11.15pm D3</b>          | <b>97</b> |                       |  |  |                                  |
| no cleavage                            |           |                       |  |  |                                  |
| 6-8c D4 10.30pm                        | 98        |                       |  |  |                                  |
| D4 10.30pm morula                      | 99        |                       |  |  |                                  |
| no cleavage                            |           |                       |  |  |                                  |
| no cleavage                            |           |                       |  |  |                                  |
| D3 11.10pm 10-14c                      | 100       |                       |  |  |                                  |
| GV                                     |           |                       |  |  |                                  |
| no egg                                 |           |                       |  |  |                                  |
| D2 8c 11.30pm                          | 101       |                       |  |  |                                  |
| D2 10.50pm 8c                          | 102       | luteinization just ok |  |  |                                  |
| no egg                                 |           |                       |  |  |                                  |
| damaged egg                            |           |                       |  |  |                                  |
| difficult to see ?cleaving             |           |                       |  |  |                                  |
| <b>cancelled - missed surge</b>        |           |                       |  |  |                                  |
| D2 11.25pm (can't score)               | 103       |                       |  |  |                                  |
| tiny egg - not inseminated             |           |                       |  |  |                                  |
| D3 10.55pm lovely 16c                  | 104       |                       |  |  |                                  |
| <b>cancelled - missed surge</b>        |           |                       |  |  |                                  |
| D3 11.05pm v.nice 16c                  | 105       |                       |  |  |                                  |
| <b>cancelled - missed surge</b>        |           |                       |  |  |                                  |
| D3 11.35pm 8c v. nice                  | 106       |                       |  |  |                                  |
