# Supplementary material
Source: PubMed Central journal article supplement (PMC6124249)
Supplement: mmc2.pdf [file mmc2.pdf]

**Supplementary Table Key:** Included in this anonymised summary database are all patients for whom we have a name or L-number, plus a date and some information about what happened to them. Note that each patient (including Brown and Montgomery – who are also named), is given a number as Patient 1, Patient 2 etc and where the same patient is involved in more than one laparoscopic oocyte recovery (LOR; see Table 2), the same P number is used as P1 (2), P1 (3) etc. P (M) refers to males in the list. RTM = return to menstruation.

***Colour code***

**Green: Procedures recorded in Table 1 (which lists all those patients due procedures that did not involve laparoscopies).**

**Blue: Cycles recorded in Table 3 (cancelled prior to laparoscopy)**

**Grey: Laparoscopies recorded in Table 4 (Attempted LOR but egg recovery was thwarted or outcome was not recorded)**

**Red: Cases of special interest. Cases where embryos were recovered.**

The data are presented by year, with column headings as detailed below.

The type and amount of detail that was recorded varied through the years, and blank columns indicate that no data for this category was found for that year. Where page numbers are not consecutive, blank pages generated as a consequence of conversion from Excel format to pdf format have been removed.

*Within each year, the column headings are:*

**A (Book):** The Oldham notebook containing data on lap cycles or other procedures;

**B (Notes):** “X” = data found in the box of loose sheets

\* = name & lap date found on lists in JP handwriting

RGE = indicates the six ‘scraps’ in RGE’s handwriting

\*\* No dedicated lap sheet found, but patient name and some details mentioned on scraps of paper

**C (FF):** X = data were found in the notebook labeled FF

**D (Churchill):** Data pertinent to this patient were found in folder specified

**E (Number):** the number of the case in the series;

**F:** (PCode) the anonymised patient code. 1, 2, 3,... Where says 3(1), 3(2) etc indicates that this P appears more than once.

**G:** (L No.) Lap-number allocated to that patient

**H:** Patient age

**I:** Stimulation regime used (PAxB = Pergonal amps x no. of doses, when recorded)

**J:** dose of hCG dose administered (not recorded during 1975 & 1978);

**K:** the date of the lap or procedure;

**L:** comments on egg recovery procedure (**1969, 1970, 1971 only**; this type of data was not recorded in subsequent yrs)

**M:** (hCG-OCR) the interval between hCG and egg recovery in hours (NR in **1976**) or Surge-OCR from **Nov 1977 to July 1978**

**N:** (folls) the numbers of follicles observed/aspirated;

**O:** (eggs) the numbers of eggs recovered;

**P:** (fate) **1969** only: the fate of the eggs;  
**1970 -1975** (not recorded thereafter): the interval between hCG and Insemination (hrs);

**Q:** (Outcome/comments 1), comments on eggs/embryos

**R:** Embryo Transfer number

**S:** (Comments 2)

**T:** Follicular phase monitoring/other comments; **1978**: urinary monitoring

**U:** (Comments 3); **1978**: serum monitoring

**V:** Sperm comments (where recorded: **1971**)

**W:** Luteal Support (from **1972 – 1977** only)

**X:** RTM

**Y:** Further comments/Final outcome of the five clinical pregnancies

**Z:** **1976** only, Histology reports in Churchill Folder 11
