# Supplementary material
Source: PubMed Central journal article supplement (PMC6124249)
Supplement: mmc3.pdf [file mmc3.pdf]

1 **Supplementary Material: Edited transcript of interview with Grace**  
2 **MacDonald conducted at Bourn Hall on 25 June 2013.**

3  
4 Approved for publication by GM on April 19th 2014.

5  
6 Speaker key

7 MHJ Martin Johnson

8 GM Grace MacDonald

9 KE Kay Elder

10  
11 MHJ We are interviewing Grace MacDonald and its 25<sup>th</sup> June 2013. We're at Bourn Hall  
12 and Grace is sitting with us, me and Kay Elder doing the interview. And Grace, I just want to  
13 confirm, first of all, you understand the nature of the interview and that you've read the  
14 ethical review form and you're happy with it?

15  
16 GM Yes, I am.

17  
18 MHJ Okay, good. So, maybe we could start right at the beginning, tell us something about  
19 your early life as a girl and where you grew up and who was important to you then and so  
20 on, these sorts of things?

21  
22 GM Oh, I was brought up in Stirling and I had a very happy childhood. I was one of six  
23 children and an older brother and I were both born in Egypt, because my father was based  
24 out there and then we moved back to Scotland, where he was from.

25  
26 MHJ So, your father was in the [*armed*] Forces?

27  
28 GM In the... yes, during the War and after, and then we settled in Stirling and so I really  
29 spent the rest of, you know, my childhood, and I'm very near Stirling again. That's where I  
30 live...

31  
32 MHJ So when did you move? What age were you when you moved back to Stirling?

33  
34 GM Just, oh, about three. Three years of age, yes.

35  
36 MHJ Three. And that was, that was what year?

37  
38 GM That would be 1949.

39  
40 MHJ 49, yes, okay. So, you didn't come across Bob Edwards when your father was in  
41 Egypt did you?

42  
43 GM I didn't even know that Bob was out there - isn't that strange?

44  
45 MHJ And my father, my father was in the Air Force in Egypt and in Iraq and Iran during the  
46 War as well. But I don't suppose he bumped into your father.

48 GM I doubt it. Dad moved around a lot; he was, actually, out there for 16 years. So he,  
49 kind of, realised that there was a war coming, so decided that he would get in to the area  
50 that he wanted... because he was an engineer. He, actually worked at, time served as an  
51 engineer on the Clyde in the years of ship building, and, I think, in the 30s, he just realised  
52 that rather than get called up, and go into a branch of the Military that he didn't want to, he  
53 went into the Army Ordinance Corp, which became the REME.  
54  
55 KE Yes, my dad was in REME.  
56  
57 GM Oh, there you are; maybe they met. It's a very small world.  
58  
59 KE Yes, and I was born in 46 as well.  
60  
61 GM See, we're all, we're all the baby boomers, we're the baby boomers.  
62  
63 KE It was a good year, it was a good year.  
64  
65 GM It was.  
66  
67 MHJ Well, 1944 was even better than that.  
68  
69 GM Oh, yes. So, that's when Richard, my brother was born, in 44. In Cairo as well, in the  
70 Military Family's Hospital, Abbassia, Cairo.  
71  
72 MHJ Have you been back to Egypt since?  
73  
74 GM I've been back to Egypt, but not Cairo. I'm hoping that - I've got... one of my cousins  
75 has just, in fact, invited me to join them in September on a Nile cruise and I've still, believe it  
76 or not, got relations in Cairo, although they're having a very, very hard time just now,  
77 because they're Christian and they're not, they're almost scared to leave their house; one's  
78 a doctor in the hospital in Cairo and she's having a terrible job of getting to and fro.  
79  
80 MHJ Is she Egyptian, or...?  
81  
82 GM Oh, no, she's, well, technically Maltese and Lebanese, because my mum was  
83 Maltese.  
84  
85 KE Your mum was Maltese?  
86  
87 GM My mum was Maltese, yes. So, we've, that was all my cousins that... I was at the  
88 wedding last week in Canada. A lot of my relations have moved to Canada. I've got far more  
89 there than I have here. Well, my mum was an amazing person, very talented. Spoke seven  
90 languages and just very, really...  
91  
92 KE What was her maiden name?  
93

94 GM Funnily enough, it was Marozzi, which, I think, way, way back was from, they were  
95 from Sicily. But they migrated, hundreds of years ago, over to Malta. So they're Maltese  
96 going back a very long way. But, and they then, my grandfather or great grandfather built,  
97 he was one of the chief engineers on the Suez Canal. So, he worked with de Lesseps, and his  
98 name was, actually, on a plaque: Salvatore Marozzi was on the plaque, which was at the  
99 canal.

100

101 MHJ Your contact with Egypt goes back that far, does it?

102

103 GM Yes, it goes back a long, long way. But then there were, it was under British mandate  
104 and, of course, Malta was British, so my mum was born with a British passport. You know,  
105 she was, she was British and very proud of it, you know, that the Maltese... and, as you  
106 know, the island sustained a horrific bombardment during the war.

107

108 KE Yes.

109

110 GM But they weathered it the same as the people in London did; they were quite  
111 amazing.

112

113 MHJ It's an interesting background. So, then you went to Stirling at the age of three and  
114 you, and you then had another five brothers and sisters?

115

116 GM Well, I've got one sister and I had four brothers.

117

118 MHJ Four brothers, yes.

119

120 GM There were six of us altogether.

121

122 MHJ It's a big family.

123

124 GM Big family, and then, unfortunately, one of my brothers drowned when he was  
125 seven, which was devastating for the family, and so that just left the, you know, the three  
126 brothers and my sister and I; and you never get over that. You know, that a seven year-old.  
127 My poor mum, and then, unfortunately, my brother Richard, he emigrated to Tasmania in  
128 the 80s and then we lost him to cancer, which I can't understand, because he was – well,  
129 again, it hits anyone doesn't it? And he was so fit and well, but then he got bowel cancer  
130 and died. So, again, poor mum; she, you know, she was just devastated.

131

132 MHJ Is she still alive?

133

134 GM No, not now, but she was then, when we lost Richard in 97. So, I think, that to me, is  
135 my worst nightmare of ever having to go through what my mother had to go through; you  
136 know, losing two of her boys. But, I think, that, in a way, has also, has influenced me, that,  
137 you know, I was so determined that I wanted to have a family too, you know, because I  
138 grew up as part of a big, a big family, so it was important to me.

139

140 MHJ Yes, so when you, so when did you start to think about having a family?

141  
142 GM Well, not long after I got married. I think, for the first two or three years I was quite  
143 happy and quite content, because I was building up my career and my husband was a  
144 professional violinist, so he was away a lot and busy and we had hectic lives.  
145  
146 MHJ So, can you give us a date? When did you marry?  
147  
148 GM I married in 1967.  
149  
150 MHJ 67, yes. So, then you were...?  
151  
152 GM I was 21.  
153  
154 MHJ 21, and your husband was...?  
155  
156 GM Mm-hmm. 20.  
157  
158 MHJ 20, and are you musical as well?  
159  
160 GM I sing; well, for years, 33 years I sang with the Royal Scottish National Orchestra  
161 Chorus, which I love and I'm still singing.  
162  
163 MHJ Was that how you met your husband?  
164  
165 GM No, no, we were at school together. He was my only boyfriend, because my mother  
166 was very strict. Being Maltese, she was very strict.  
167  
168 MHJ Yes. Well, I can imagine, yes.  
169  
170 GM And having four brothers, well, by that time, three brothers to, kind of, chaperone  
171 you.  
172  
173 MHJ They're different days now aren't they?  
174  
175 KE Oh, yes.  
176  
177 GM Oh, it really was that, you know; I would go to a dance, and then, strangely enough,  
178 Richard would be outside to walk me home. It was lovely, because then Jimmy, my ex and  
179 Richard would walk along talking and I would trail along behind.  
180  
181 MHJ So, you were 21 when you got married; when did you leave school?  
182  
183 GM I left school when I was 18 and then went to study in Edinburgh.  
184  
185 MHJ The University?  
186

187 GM Well, it was, at that time, Napier University, and then I did other postgraduates after  
188 that. But I started off at Napier.  
189  
190 MHJ And what did you study there?  
191  
192 GM Hospitality Management and then went, started working in industry, which I  
193 enjoyed, in hotels, restaurants, and when I got, when I was married and we moved through  
194 to Glasgow not long after, about a year and a half after I got married, I took a job with the  
195 School Meals Service because it fitted in better with, you know, Jimmy being away a lot. So,  
196 I was a supervisor with School Meals and then got a job in teaching, which I always wanted  
197 to do. But you needed to have industrial experience first and I wanted to teach adults  
198 professionally.  
199  
200 MHJ Where were you teaching?  
201  
202 GM Well, I started teaching, 1970 in a college, a small college in Glasgow and I've also  
203 worked in Clydebank College and Coatbridge College and then finally in Falkirk College,  
204 where I was there for over 20 years, 25 years, and then as I was going through my teacher  
205 training and then I did postgraduate certificates and diplomas in Guidance and Counselling,  
206 because I was very interested in helping the, you know, the youngsters in the college, and  
207 then, finally, I did a Master's at Edinburgh University in Advanced Professional Studies.  
208  
209 MHJ So, your husband, what was he called?  
210  
211 GM Well, I'm divorced, and have been for a long time.  
212  
213 MHJ Yes, I know, but was called?  
214  
215 GM Jimmy Montgomery.  
216  
217 MHJ Montgomery.  
218  
219 GM Yes, Alistair was Monty all through school; he still is.  
220  
221 MHJ Yes, and whom was he [*Jimmy*] playing with?  
222  
223 GM He started off playing with the SNO before it became Royal and then he played for  
224 Scottish Opera.  
225  
226 MHJ That's had rather a chequered career, Scottish Opera, hasn't it?  
227  
228 GM Oh, I know. They've really come through the wars a little bit.  
229  
230 MHJ Yes, no, I heard that at one time, they were more or less going to be closed, or were  
231 closed, weren't they?  
232  
233 GM They were almost. They were on the brink of being closed down.

234

235 MHJ Yes, they've done some really interesting things recently. I've never seen them  
236 perform, but I've heard lots of good things about them in recent years.

237

238 GM I think, they're very good and, you know, I used to, sometimes go on tour with, you  
239 know, if it was the summer holidays, because I got school holidays, which was great, we'd,  
240 quite often, if the band were on tour with the Opera, we used to come to places like Snape,  
241 you know, over in Aldeburgh, which was wonderful, and...

242

243 MHJ Yes, actually, I think, they toured The Flying Dutchman – I think, it was The Scottish  
244 Opera – to Norwich once and I did go to that; they were very good.

245

246 GM We've done the stage version of that, with choir and the orchestra and it was  
247 wonderful. We did that in The Royal Scottish, you know, the Royal Concert Hall in Glasgow.  
248 It was amazing. There were some very, very good soloists. Really enjoyed that.

249

250 MHJ So, you're now married and you're working and want to have a family, but not  
251 immediately?

252

253 GM Yes, I think, like most young couples, we had just bought a house and we were going  
254 to wait for two or three years to get it furnished and carpeted. We had wooden floors for  
255 quite a long time, bare boards; nowadays it's fashionable, but...

256

257 MHJ Yes, I remember my mother's great ambition in life was not to have linoleum, but to  
258 have fitted carpets.

259

260 GM Exactly. Well, we fell heir to a lot of stuff, which was awfully nice, but we gradually  
261 thought it would be quite nice to have our own stuff. So, that was the main purpose; we  
262 wanted to save up and, you know, get the house furnished and we were living in  
263 Bishopbriggs just outside Glasgow and I was travelling in to the south side of Glasgow, and  
264 then, as I said, I then decided it was, maybe, about time I would start a family and then  
265 that's when all my troubles started. I had a lot of trouble with ovarian cysts and adhesions  
266 and that started in about 1972.

267

268 KE So, you'd been married five years then?

269

270 GM Mm-hmm. Yes.

271

272 KE And you saw a gynaecologist in...?

273

274 GM Glasgow. David McKay Hart, who was just wonderful. He was very, very supportive,  
275 because I remember going to him to find out, you know, that I, why I hadn't become  
276 pregnant, and he gave me an exam and said there's something wrong. So I was, I went in for  
277 a laparoscopy, and he discovered that I was in a terrible state, and...

278

279 KE So, you had a laparoscopy in Glasgow in the 1970s?

280

281 GM Yes, 1972.  
282  
283 MHJ Yes, there was someone quite early on in Glasgow, who took it up, so maybe it was  
284 him, yes.  
285  
286 KE He must have known Patrick then.  
287  
288 GM No...  
289  
290 KE No, he didn't...?  
291  
292 GM I told him about Patrick, because he, they didn't know, he didn't know anything  
293 about the study, you know, where it's, what was going on and, in Oldham, and I...  
294  
295 KE I'm just asking, because laparoscopy was very new in those days.  
296  
297 GM Oh, he must have – oh, I beg your pardon – yes, he probably knew, but he didn't  
298 know about the IVF bit, but he certainly...  
299  
300 KE He did a laparoscopy?  
301  
302 GM He did the, yes, he did the laparoscopy. I think, it was in 72 or 73. Yes, because...  
303  
304 MHJ Certainly, there was someone in Glasgow who was one of the earliest people to take  
305 it up. There was a group there taking it up quite seriously quite early on before most, before  
306 most of the rest of the country did. There was a group in London, there was a group in  
307 Glasgow.  
308  
309 GM I didn't know that, right. Well, it might have been him and a chap called Bobby Low  
310 who worked with him. At Stobhill Hospital.  
311  
312 MHJ So, when they did the laparoscopy investigation, what did they tell you?  
313  
314 GM Well, they said that my tubes were blocked, and he then said that he was going to  
315 try his best to open them for me. So, he said something about putting in some kind of tiny  
316 little tube or something.  
317  
318 KE Or stent?  
319  
320 GM Uh-huh. To try and open them, but, unfortunately, that didn't work either, so, you  
321 know, he did everything he possibly could for me, but he was wonderful.  
322  
323 KE Over what sort of time period would that be?  
324  
325 GM That was from, I would say, 1972 to about 1974.  
326  
327 KE Okay, a couple of years.

328  
329 GM Yes, and then he, kind of, said to me, there was nothing more he could do.  
330  
331 MHJ So, by that stage, you were 30, is that right?  
332  
333 GM I would have been 29 or 28 or...  
334  
335 KE 28/29, yes.  
336  
337 MHJ Yes, 28. Okay. So, then, how did you get to Patrick and when did you first see  
338 Patrick?  
339  
340 GM Well, I, early on in 1975, I think, it was, well it must have been 74 that I first found  
341 the article, because in January 75, I went back to see David McKay Hart and I told him about  
342 this article I'd found.  
343  
344 MHJ Can you remember where it was?  
345  
346 GM I think it was in The Lancet. Because I had been visiting friends in Stirling, and Jimmy  
347 and his friend's husband were busy playing, and Graham was playing the piano and Jimmy  
348 was playing the fiddle and I got, kind of, bored. So I was, just on their coffee table, there was  
349 a copy of The Lancet.  
350  
351 KE Isn't that incredible? Because you wouldn't have found The Lancet anywhere else.  
352  
353 GM Oh, no, exactly.  
354  
355 KE No, you wouldn't have known to even, it existed.  
356  
357 GM I wouldn't, no, exactly. But it said something about infertility and it just jumped out  
358 at me and then...  
359  
360 KE So, that may have been The Lancet paper about the ectopic, maybe?  
361  
362 MHJ Was it by Patrick?  
363  
364 GM I think, it was. It was, it was, yes, well, yes, it must have been, because it was his  
365 name and I took a note of it, because when it described what, as it turned out, I think, it was  
366 P38, who I later was in with twice. It was explaining what this lady had, the problem she  
367 had, and it described me to a T. and I thought, gosh, there's somebody, actually, doing some  
368 work in this area to help people with my problem.  
369  
370 KE Yes, there, well there, so there was a paper about P38 [**Editors' Note: Steptoe, P.C.,**  
371 *Edwards, R.G. 1976. Reimplantation of a human embryo with subsequent tubal pregnancy.*  
372 *Lancet, i, 880–882. Wrong date – no reference in 1974 to Steptoe has been found in the*  
373 *Lancet. In the BMJ, Steptoe did publish one paper in 1974 but this did not mention infertility.*



374 *Edwards and Steptoe did publish in September 1974 in Proc Royal Soc Med (67, p30-34),*  
375 *which GM may have misremembered as Lancet. Alternatively Newsweek did publish a piece*  
376 *on July 29<sup>th</sup> 1974 relating to Bevis' claim of three test tube babies having been born that did*  
377 *cite Steptoe extensively. Possibly this is what GM saw?]*

378

379 MJ This is, this is the end of 74, you think?

380

381 GM Yes, I think, roughly about then. I, sorry, I can't remember exactly, but that was  
382 when...

383

384 KE But isn't that amazing that you, just by chance, came across it?

385

386 GM Oh, I know. It was almost like it was meant. Sorry, can I just refer to something,  
387 because I've got a brain, a memory like a sieve these days, that I've had this, obviously, for a  
388 very, very long time, but I jotted down, I remembered gradually... I'll just refer to this; right,  
389 [reads] 'antibiotic treatment for'... that was, sorry [reads] 'referred to Mr Steptoe in January  
390 75, by David, Dr David McKay Hart.' But that was, so I, it must have been about end of 74; I  
391 went to make an appointment with David in Glasgow and I said to him, look, I found out  
392 about this. Can you, can I, could you please refer me, and David being David, stroked his  
393 beard and said, oh, very interesting. Yes, yes, I think, this is a very good idea. Yes, yes, I  
394 think, that would be a very good idea. I'll write, and you write, and so we did and it took  
395 ages, before we heard back. Then I heard back and got an appointment to go and see him,  
396 because I'd put here, as I said, I've just jotted these down: previous treatment by David  
397 McKay Hart in 1974 for ovarian cysts, because I'd been back in again. 'Adhesions and  
398 attempt to clear the tubes.' So, that was, again, in 74. Certainly, it was later on that year  
399 that I found the article, and I was examined by Mr Steptoe on 2<sup>nd</sup> October 76, so it took,  
400 really from beginning of January 75, when we wrote, till 76, but I've, the reason we were  
401 told was that he was having trouble with his hips.

402

403 KE With his hips, yes.

404

405 GM So, everything had been put on hold.

406

407 MHJ Yes, he took time off for that period [1975-78; *Johnson and Elder, 2014, The Oldham*  
408 *Notebooks: an analysis of the development of IVF 1969-1978. V. The role of Jean Purdy*  
409 *reassessed. RBMO, this issue*]. Yes. So, you came down in October 76?

410

411 GM Yes, 2<sup>nd</sup> October 76.

412

413 MHJ And whom did you see then?

414

415 GM That was, we went to Patrick's rooms in Oldham and then he said he wanted me to  
416 come in so that he could do a laparoscopy just to find out what kind of state I was in, and  
417 unfortunately, again, I had got worse with adhesions and other problems and so in  
418 December 1976, he did an exploratory examination laparoscopy and then within a week,  
419 he carried out a major operation to remove ovarian cysts, septic adhesions and diseased

420 fallopian tubes. So, he did the lot. I remember it was Christmas Eve, because I had gone in  
421 the week before and he thought I would be in and out.  
422  
423 KE So, it was Christmas Eve in 76, you had the laparotomy then?  
424  
425 GM No, that was the big operation. I'd had the laparotomy the week before.  
426  
427 KE The big operation in...  
428  
429 GM The big operation, yes, and then he said, after the laparotomy, he said, you're not  
430 going home. I can't let you go. I've got to do this operation; and I said, well, that's fine.  
431  
432 MHJ Had you had any previous abdominal surgery prior to that?  
433  
434 GM Yes, I've had also cysts removed.  
435  
436 MHJ Would that have been before all of that, when you were younger, yes, or at that  
437 time?  
438  
439 GM Oh, I'd had, I'd had, when I was at college in Edinburgh, I had peritonitis.  
440  
441 MHJ Okay, yes, so that would explain it.  
442  
443 KE Okay, so that explains it all, yes.  
444  
445 GM So, I was rushed into Edinburgh Royal.  
446  
447 KE Yes, that would have been the start of your troubles: probably with the blocked  
448 tubes... yes.  
449  
450 GM Absolutely. The doctor said that. Mm-hmm. Yes, because then it was in a bit of a  
451 mess.  
452  
453 KE So, that was from appendix? Yes.  
454  
455 MHJ So, that was Christmas Eve on 76, you had the major operation. And you stayed  
456 there on Christmas day?  
457  
458 GM Oh, yes. It was so funny too, because Patrick came in with his family, which was  
459 lovely. He came in with Sally and their son.  
460  
461 KE Andrew?  
462  
463 GM No, not Andrew, but, I think, Sally's children, and it was just so lovely; they came  
464 round all his patients and wished us a happy Christmas, and he came to my bed and he said,  
465 I've got, kind of, good news and bad news. I went, oh, all right, give me the bad news first;

466 and he said, well, I've had to remove your tubes and most, I think, I can't remember if it was  
467 a whole ovary, but, certainly, he'd had to remove...  
468  
469 KE Part of... yes.  
470  
471 GM Like, most of one and part of the other one with the cysts. He said, but the good  
472 news is, everything else is in perfect working order. So, if you want to, I'm happy to take you  
473 onto the programme. So that was, that was my Christmas present.  
474  
475 MHJ And how did you feel about going onto the programme?  
476  
477 GM Oh, as if I'd been given, you know, a gold watch, really, because I knew it was my  
478 only chance. So, at least I felt that there was still hope, there was still hope for me.  
479  
480 MHJ And did he explain to you what the programme involved at that point or later?  
481  
482 GM He had explained it very, very clearly the time before, when we'd come down in  
483 October to his rooms and he explained the implications that there was no, up till then, had  
484 been no success. He was, he was brutally honest.  
485  
486 MHJ He took you through the procedures and so on, did he?  
487  
488 GM Yes. Mm-hmm.  
489  
490 MHJ Yes, and you were happy with all that?  
491  
492 GM Oh, absolutely.  
493  
494 MHJ And the lack of certainty?  
495  
496 GM I'm a great believer in looking on the positive.  
497  
498 MHJ Did you ask him how many people he'd tried to help?  
499  
500 GM No, I didn't, actually; I just...  
501  
502 MHJ Did he, did he say that?  
503  
504 GM No, he didn't. I think, he just said that there were other girls on the, on the  
505 programme; I'd probably meet some of them and I don't think, I don't think I even thought  
506 to ask. I think, I was just single-mindedly thinking that, you know, it was, this was my chance  
507 and that if, you know, if I could, at least, be given this chance, then along with other people,  
508 we'd all, you know, we would all be successful. But, I didn't, actually, think at the time, oh, I  
509 wonder how many others? I had, in my own naïve way at that time, I had, kind of, assumed  
510 that eventually it would be very successful and there would be lots of, you know, other  
511 women trying this and being successful. But we were also told at the time that it would be  
512 very, very secret. You know, for the, for the children's' sake. So, I accepted that at face-value

513 that there may be loads of others out there and that we would never know – naïve, or  
514 what?  
515  
516 KE No, no. For those days, you were quite right, yes.  
517  
518 MHJ And they explained why they kept it secret, didn't they?  
519  
520 GM Well, I think, because of that, all the adverse publicity, which was horrible, I mean,  
521 how many innovative things have there been in history and nowadays we'll look back on  
522 them and think, what on earth were...? And the same has happened with IVF, hasn't it,  
523 now? How many people are there...?  
524  
525 MHJ but you were aware of the negative...  
526  
527 GM Press, yes.  
528  
529 MHJ Did that cause you any concern?  
530  
531 GM No. Not at all, because I believed totally in... I had met Patrick by that time and I saw  
532 what a really nice ethical person he was – very honest, and I trusted him, trusted him  
533 implicitly. So, I knew that there wouldn't be a question of...  
534  
535 KE I know what you mean; you could see that he was a man of integrity.  
536  
537 GM That's it. Mm-hmm. And then, of course, when I met Bob, that was it. I just realised  
538 straight away, what a wonderful person and...  
539  
540 MHJ So, when did you meet Bob?  
541  
542 GM When did I meet Bob? Did I put that down? Right, it would have been '15<sup>th</sup> February  
543 1977'.  
544  
545 MHJ So, that would, that would be 1977, so that was exactly eight years after the Nature  
546 Paper was published describing the first IVF, which is 15<sup>th</sup> February 1969, exactly, to the day.  
547  
548 GM Isn't that funny?  
549  
550 MHJ Isn't that extraordinary? Yes, I still remember that day vividly. I was in the lab and all  
551 the press started to try and invade the lab, and television cameras with great long cables  
552 snaking up the stairs. And we were sent out by Bob - Richard [*Gardner*] and I were sent out -  
553 to stop them and tell them to go out, because the rest of the department were really saying:  
554 get the people out of this place. So that was when you saw Bob, again, at Oldham. Is this at  
555 Oldham General, all of this, or...?  
556  
557 GM No, this was, by this time it was - I had the big operation at Oldham General and  
558 what also gave me a lot of encouragement was because it was Christmas time, they closed  
559 Kershaw's down, so some of the girls who were at Kershaw's came into the ward with me,

560 and I, and I'm still in touch with one of the girls; we're very close friends. And she never did  
561 have a baby. But she, they were still at the tail end of the, kind of, month's cycle to see, you  
562 know, they had had the implant done at Kershaw's, but they were moved up to the main  
563 hospital. But, unfortunately, P234 and P233 who were on either side of me... and I didn't like  
564 to ask them; you could see they didn't want to talk about it, but eventually I went over and  
565 said to P233, excuse me asking, but, you know, are you, have you, by any chance, been on a  
566 special kind of study with Mr Steptoe and they, kind of, looked and I said, why I'm asking is,  
567 I'm now being told that I think I'm going to be accepted on it. So that was all right. So they  
568 told...

569

570 MHJ And so they took the secrecy thing very seriously?

571

572 GM Oh, very, very, uh-huh, and then the funny thing was, P234, who was in the bed next  
573 to me, she was back in the next time when I went in and, in February.

574

575 MHJ So, February, you met Bob and that was to go in for the first attempt, was it?

576

577 GM That was the first attempt.

578

579 MHJ Okay, you said that once you met Bob, all your fears disappeared.

580

581 GM Oh, totally.

582

583 MHJ What was the first meeting like?

584

585 GM Well, he was just, he was just so gentle and, again, just so down to earth about it and  
586 just explained what was going to be happening; I wasn't to worry. I would be coming, well,  
587 you know, in, coming in, for the blood tests and the carrying round the...

588

589 KE The urine samples.

590

591 GM Sample bottles, and orange bottles. Plastic orange bottle; and he explained exactly  
592 what, you know, what was going to be happening and, but he was just so kind and just, as I  
593 said, down to earth about it. Not, you know, he didn't talk in technical jargon and...

594

595 KE Yes, so he wouldn't talk down to you, would he?

596

597 GM Oh, not at all.

598

599 KE Never, yes.

600

601 GM No, he was, he was just wonderful.

602

603 MHJ He just talked conversationally?

604

605 GM Yes, just Bob, really.

606

607 MHJ And did he explain to you about the chances of success and so on, or...?  
608  
609 GM No, I don't think he really did. He just said that there were quite a few, well, there  
610 were quite a few other girls on the programme by this time. There weren't going to be as  
611 many and they did explain that, that time, but he hoped I'd be fine and I know, he was, he  
612 said, I know you're away from home, and then we started talking about Edinburgh, because  
613 he'd been up there and he said, oh, you studied there. I said I study, and – oh, and then... so,  
614 it was just like a normal, kind of, conversation, interwoven with what was going to be going  
615 on. So, it was just as if we were having a cup of tea and a natter. It was, it was lovely.  
616  
617 MHJ Mm-hmm. It was reassuring?  
618  
619 GM Oh yes.  
620  
621 MHJ Because you must have felt a bit tense going down there, did you?  
622  
623 GM Yes. And, uh-huh, yes, just getting the train down and wondering, you know, what  
624 was going to happen.  
625  
626 MHJ Mm-hmm, and when did you first meet Jean?  
627  
628 GM Jean was, I should think, I didn't, actually, meet Jean until I had to go in on 23<sup>rd</sup>. I  
629 was, actually, taken in by that time; obviously, I had peaked. So, that's when I met Jean, and  
630 she, again, was just wonderful. You know, she made us all feel, you know, so, just relaxed  
631 and, you know, that we, they were going to do their best for us and she was, she was just  
632 incredible.  
633  
634 MHJ And on 23<sup>rd</sup>, why were you in there?  
635  
636 GM Well, I had gone down on 15<sup>th</sup>, but I started the hormone treatment and for the  
637 operations, the egg was... because we didn't stay in at that time; you just came back in  
638 when they told you to, that, you're, you know, you were reaching...  
639  
640 KE So, were you staying, were you staying locally then?  
641  
642 GM Well, when I had been down at Christmas time, I had almost been adopted by a  
643 family, which was wonderful – one of the girls in the ward – and her mum was our, well, she  
644 worked on the Gynae Ward with Patrick, and that I'm still very, very close to Denise, and her  
645 mum lived, literally, across the road from Kershaw's.  
646  
647 KE So, they looked after you?  
648  
649 GM Yes. Well, I was booked into a bed and breakfast and Denise found out, because I  
650 phoned her up and said, I'm back down. Where are you? And, I said, I'm in a bed and... you  
651 just wait there and I'm coming for you. I went oh... they were just wonderful and they... so I,  
652 well, at first, I was just staying with Denise and then Hilda, her mum said, oh you can't do  
653 that, because you had to, I had to make my way up to Kershaw's everyday with my...

654  
655 MHJ Sample, yes.  
656  
657 GM Yes. So, I stayed with Hilda and Harry ... across the road, so that I was able to go in  
658 and out, so I don't, I, again, I said, it was almost as if somebody up there was smiling down  
659 at me and saying, we're going to arrange it and make it easy for you. They were just  
660 wonderful.  
661  
662 MHJ And was your husband with you through all this, or...?  
663  
664 GM No. He only came down when, it would have been on 26<sup>th</sup>, when they were going to  
665 put... no, well, he would have, must have come down on 23<sup>rd</sup>, because, of course, it was  
666 when I went into the little theatre – Mr Campbell, who was the anaesthetist, who was  
667 lovely. He was a Scot, as you may have gathered, and he had to phone Jimmy to say you  
668 have to come down now and so he came and stayed again overnight with Denise and then  
669 came in first thing in the morning when they were doing the op.  
670  
671 MHJ So he hadn't come down with you on the 1<sup>st</sup>, on 14<sup>th</sup> or 15<sup>th</sup>?  
672  
673 GM No, no. I came down on the train. So, and then I was on, it was from 23<sup>rd</sup> and then  
674 26<sup>th</sup> was when the ovum was replaced, but it, unfortunately didn't work.  
675  
676 KE That one didn't work, yes.  
677  
678 GM No.  
679  
680 MHJ Can we just talk a little bit about your husband? Was he as keen as you on the  
681 procedure?  
682  
683 GM No. I don't think he ever really, in fact, he's quoted in a paper as saying, he never,  
684 actually, believed it would work, but he knew how stubborn I was and just, kind of, gave me  
685 my head. Maybe that explained a lot. Mm-hmm. But...  
686  
687 MHJ Mm-hmm. It's not uncommon, is it?  
688  
689 KE No.  
690  
691 GM Really? That's sad, isn't it?  
692  
693 KE Yes.  
694  
695 GM I found that really quite sad afterwards. But I've got Alistair. Yes.  
696  
697 MHJ So, that didn't work, unfortunately? That transfer?  
698  
699 GM That, no. I went home on 8<sup>th</sup> March, the day after my birthday. That was a great  
700 birthday present; crying my eyes out going up on the train.

701  
702 MHJ So, you stayed down for the testing and so on?  
703  
704 KE You stayed until you found out?  
705  
706 GM Well, you always, you always had to. You stayed until you either were successful,  
707 which none of us were, or until, you know, your cycle started again. So, it wasn't successful.  
708  
709 MHJ So, you were there from 15<sup>th</sup>, to the...?  
710  
711 GM 15<sup>th</sup> February till 8<sup>th</sup> March.  
712  
713 MHJ That's quite a long time, isn't it?  
714  
715 KE Yes.  
716  
717 GM Mm-hmm.  
718  
719 MHJ And everyone was doing that?  
720  
721 GM Oh, yes. That was the, that was quite... that's how you got to know the girls so well  
722 and how we became like a family. You know, because we were sharing something.  
723  
724 MHJ And in that time, how much do you see of Bob, Patrick or Jean? Very much, or...?  
725  
726 GM Well, yes; poor Bob. I don't know how he did it. He used to be up and down that  
727 road in his old car. That's what Alistair was laughing about, you know, and Bob was sharing  
728 with him his memories of when he was a teenager. He loved... he and Bob, as you know, got  
729 on like a house on fire; the same sense of humour, but he was saying that what he loved  
730 was Bob explaining about the air conditioning in his car and he said to Alistair you can wind  
731 down both windows in the back of this car, and Alistair's never forgotten that.  
732  
733 MHJ It's a great Bob remark that, isn't it?  
734  
735 GM It's very much a Bob remark. He was an amazing man. So, I, so that, I went home and  
736 then...  
737  
738 KE But did they, did you have a discussion with Bob or Patrick or both when, just before  
739 you went home about what had happened, and...?  
740  
741 GM That was, actually, Bob.  
742  
743 KE It was Bob? Yes.  
744  
745 GM Mm-hmm. Yes, he came and he was just so compassionate. You know, he just came  
746 in, came into the little room in Oldham and said that, well, I knew that he... he just said  
747 unfortunately, this time hasn't been successful, but that doesn't mean, you know, you can't



748 try again. Please, you know, please do, and he was just very, very supportive, and Jeannie  
749 too. Because Jeannie used to always pop in, you know, when they were, they were coming  
750 up and down the road. I mean, they would arrive, sometimes, late at night and were straight  
751 in to the little theatre, which was just opposite where we were.

752

753 MHJ And all of this, you weren't having to pay for any this, presumably, no?

754

755 GM No, it was... We were so lucky.

756

757 MHJ You just had to cover the cost of your travel and your accommodation?

758

759 GM We paid for all of that ourselves. But we didn't have to pay for the treatment. No, at  
760 that time, of course, it was out of the goodness of the, or the foresight of Oldham or did  
761 they? I mean, they donated the facilities, didn't they?

762

763 KE The facilities, I guess.

764

765 GM But I know that Bob and Patrick, I think, had to buy the, a lot of the equipment.

766

767 MHJ Mm-hmm. Yes, they did. They had a lot of money from a wealthy Californian Heiress.

768

769 GM Isn't that wonderful? What an amazing person, that she had the foresight to see that  
770 this was something so important, and out of a philanthropic attitude, not because, I doubt if  
771 she would...

772

773 KE Do you know how she, how she heard about it, then?

774

775 MHJ No, I don't know any of that at all. Anyway, that's as an aside. So, yes, so, when did  
776 you then, so what was your feeling? Did you talk about it with your husband when you went  
777 back?

778

779 GM Oh, yes, and, I think, he just, sort of, said, oh, that's a pity. But then, unfortunately,  
780 we had a wee bit of a hiccup ourselves, whereas things weren't going well, and, probably,  
781 again, partly to do with the stress and my anxiety about – obsession, if you want to call it –  
782 of having a baby. But we, actually, split – I have, I haven't told this, really, to anyone – but  
783 we split up for a while, because it was just impossible. He was, unfortunately, drinking too  
784 much and other problems. He'd had, almost, like a, well, he'd had a nervous breakdown. So,  
785 he wasn't well. And I went back, went back to my mummy, back to Stirling, because I just  
786 realised that I, it was better that we had some space, but eventually, we got back together  
787 and we talked things through and we came onto a much, much better, into a much, much  
788 better place. So, that was when, that was why there was a big, quite a big gap.

789

790 KE Oh, before you came down again?

791

792 GM Before I came down again, yes. So that was in, on [reads] '18<sup>th</sup> May 1978'. 78 was  
793 when I came down for the second attempt.

794  
795 MHJ So, by then, you were 32; is that right?  
796  
797 KE 32, yes.  
798  
799 GM Yes. Uh-huh.  
800  
801 MHJ Okay, yes, and during the time, so that was how long ago? Between... how long...?  
802  
803 GM Well, that was 8<sup>th</sup> March and then it was over a year.  
804  
805 MHJ Yes. Did you ever think, in that time, about having donor sperm, or did that not cross  
806 your mind?  
807  
808 GM No. No, I don't think that that even entered my head.  
809  
810 MHJ No, I'm not sure it would in those days.  
811  
812 GM No.  
813  
814 KE No, there wouldn't have been any reason for you to even think of it, I'm sure, yes.  
815  
816 GM No.  
817  
818 KE It wouldn't have been something that... no, it wouldn't have been discussed with you  
819 even.  
820  
821 GM No.  
822  
823 MHJ So, you wanted to have a baby with your husband?  
824  
825 GM Mm-hmm. But in the meantime, we had put our name down for adoption, because  
826 he had agreed to that, because, you know, he realised how important it was to me, so we'd  
827 been, we'd started on that process as well.  
828  
829 MHJ Yes, and then you came down again?  
830  
831 GM Mm-hmm. On 18<sup>th</sup> May 78.  
832  
833 MHJ 78, and what happened that time?  
834  
835 GM Well, it was, again, it was, it was different, because I didn't, there weren't... Bob  
836 came and I remember him grinning and he said, you don't... because I was really not well at  
837 all on the hormone the year before...  
838  
839 KE Yes, the Pergonal, yes; the injection.  
840

841 GM Yes, uh-huh. Oh, I had a, it unfortunately had an adverse effect on me; I just kept  
842 being sick with it and not feeling well. So, didn't surprise me that it didn't work, but the next  
843 time he came down, and I remember him. I was saying, oh, and are we going to have to,  
844 Professor Edwards, are we going to have that awful hormone? And he laughed and he said,  
845 no. We're going to try it just normally this time, and I went, oh, really? I said, how are you  
846 going to manage that? And he said, we will take in blood; so there was blood-taking every  
847 few hours. I can't... and, he said, that way...

848

849 KE And then the urine samples every three hours?

850

851 GM Yes, uh-huh. So that was fine. That was fine, as long as I wasn't going to have the  
852 hormone treatment, because I thought how can you become pregnant if you're feeling so  
853 ill? You know, but, so that was 18<sup>th</sup> May – went down. 20<sup>th</sup> May was the operation, but,  
854 actually, again, it was sheer luck, because I'd remember a Miss Mann, Diana Mann had  
855 phoned me up and she – well, I phoned her first, to say that I was... could I get back on the  
856 programme? Oh, yes, that's no problem. And she said, just do your usual, and, of course, it's  
857 in the diaries – where did I put them? – you know, checking off and, but I went down,  
858 actually, a day early, which, thank goodness I did, because that's what they were saying they  
859 would have missed. We would, actually...

860

861 KE You would have missed the surge.

862

863 GM We would have missed the surge.

864

865 MHJ So, did you have regular, sort of, cycles, did you at that stage?

866

867 GM Well, regular for me, which was about every three weeks. Because I'd, I've always  
868 had... because I remember if... I wrote a diary. Where, when was that? [reads] '18<sup>th</sup> May'.

869

870 KE You're a treasure, Grace.

871

872 GM No, that's the wrong one; that's 77. That must have been when it was the year  
873 before 8<sup>th</sup> March, I think. What did I even put there? Oh, that's all the names of all the girls  
874 that I'd made friends with when I was down there. Oh, P38, P244, P237, P246, P245 and  
875 P233, because that was, she was my friend, who's a writer, she said, she was the one that  
876 I'd met at Christmas time. Isn't that funny? oh, so I keep my diaries, as you can see. So,  
877 when was that, May? What did I put then? I love this [reads] 'Icing. Make' – I was doing a  
878 cake, a cake decorating demonstration on the Sunday – 'make the icing for the cake.  
879 Homecraft Centre demonstration, 7:30 (scored out) – train, 12:10; hospital for 6pm; staying  
880 with Hilda and Harry; Doctor's line for one week and then urine test every three hours.'  
881 Absolutely right. Operation at 9am; you see, I'd just about missed it, because if I'd come  
882 down the day later...

883

884 KE They would have missed it.

885

886 GM It would have been too late, that. I just knew, myself; Diana said to me, Diana Mann  
887 [PS's secretary], said, right, come down on the Saturday. So I said to her, do you mind if I

888 come down just a wee bit earlier? So, I actually, came down on the Thursday myself,  
889 because I knew what my cycle was like for being very short. So then...  
890  
891 KE Mm-hmm. That was so smart.  
892  
893 GM Well, I just knew that, I know, I knew what I was like.  
894  
895 KE Yes, but you were quite right, yes.  
896  
897 MHJ Women know their own bodies better.  
898  
899 GM Oh, yes. Uh-huh.  
900  
901 KE No, in the natural cycle, if you'd, if you'd been a day later, it would have been, it  
902 would have been gone, yes.  
903  
904 GM It would have been gone; that's what I keep just saying. Somebody up there's  
905 definitely...  
906  
907 KE Somebody looking after you.  
908  
909 GM Looking after me, uh-huh. Then I've put here, that Jimmy, Denise and Philip [*the*  
910 *friends I had met on my first trip down*] came in to see me, so that was the operation in the  
911 morning, and then, of course, Jimmy had to be there and then Jimmy came in and he'd gone  
912 home. So that was on 21<sup>st</sup> May. [*reads*] 'Nothing yet. Denise came in to see me; blood test in  
913 the morning. P234 sent home: no luck. I'm done at night; lie still all day. Hilda came in  
914 twice.' She was so good, just from across the road. 'Up today, but take it easy', and then,  
915 Jimmy came back down at the weekend and then I moved to D2 in Oldham District General  
916 Hospital, because there were so many girls coming in at that stage that there was no room.  
917 So I was moved up to, up to the big Hospital and had more blood tests.  
918  
919 KE Yes? Because Lesley [*Brown*] was pregnant by that time. She was, she was...  
920  
921 GM Oh, yes. I think, she was, practically...  
922  
923 KE She was, she was already in Oldham. She was, she was there since April.  
924  
925 GM I think she was, because I remember somebody saying to me...  
926  
927 KE No, she was. She was there from April.  
928  
929 GM Yes, so we, actually, were in the same place, but in different wards.  
930  
931 KE And did you know that she was pregnant?  
932  
933 GM Yes. I had heard from somebody who was in with me, who had been in with Lesley,  
934 and because that time, there were, instead of there being just the half a dozen of us, which

935 had been the year before, there was 21 of us. You know, so at that time, obviously, coming  
936 and going, because, you know, that...  
937  
938 MHJ Mm-hmm. Because that was the time when they were just running up to finishing,  
939 weren't they?  
940  
941 KE That's right, yes.  
942  
943 GM It was the last, because Patrick was retiring. Yes, we had a big party for him and we  
944 all signed a card from The Ovum Club to Patrick. Oh, it was, it was wonderful, and I was the  
945 first one down at that time, and I was, obviously, the last to leave; I was still there on...  
946 walked down to Dr Kershaw's to see the girls.  
947  
948 MHJ What day is that?  
949  
950 GM That's 21<sup>st</sup>, and 'P237 and Diane [*Mann*] yesterday'. So, P237 had come down from  
951 Glasgow, my friend that I still... my good friend. She had been in with me the year before,  
952 and again, she'd been referred by David McKay Hart after I, you know, I'd started the ball  
953 rolling. 'Went to Dr Kershaw's again', and I used to walk down. 'Taking things easy, and then  
954 I started bleeding [*break through bleeding*] So far, so good; no signs of period starting. Can't  
955 dare to believe it's worked, but pray it has' – oh...  
956  
957 MHJ Which day was that?  
958  
959 GM That was 3<sup>rd</sup> June, uh-huh; 'back to Dr Kershaw's. 21 girls in now. Blood test. Bob  
960 came in to see me in my room, told me that other girls are going home and I must not get  
961 upset. Things looking good for me, though. Very difficult to not be upset.'  
962  
963 MHJ What day was that?  
964  
965 GM That was 8<sup>th</sup>, 6<sup>th</sup> June.  
966  
967 MHJ And why was it very difficult not to be upset? Because the other girls were going?  
968  
969 GM Were going to be going home and he knew how close we all were.  
970  
971 KE Yes. At that point, you were still having blood tests, weren't you?  
972  
973 GM Yes. Uh-huh.  
974  
975 KE Yes. I think, they were every day, if I remember.  
976  
977 GM I think so.  
978  
979 KE They were just near enough every day.  
980  
981 GM Yes. You'll have, you'll know.

982  
983 KE Yes, I've got all, I've got all your results, so yes.  
984  
985 GM Oh, I'm still, all I've written here is, 'still okay. Gone off coffee – good sign? 8<sup>th</sup> June.'  
986  
987 KE They didn't give you any other injections or medicines or anything after the transfer,  
988 then?  
989  
990 GM Absolutely nothing.  
991  
992 KE Because they did, they did the previous time. The first time they did a few injections,  
993 maybe.  
994  
995 GM Uh-huh.  
996  
997 KE But I was just noticing that when they started the natural cycle, they didn't give any  
998 luteal support. I just realised that recently, when I was going through it for the millionth  
999 time. Yes, so you, yes, I couldn't see any evidence that you were given anything after the,  
1000 after the... yes.  
1001  
1002 GM No, it was literally nothing and then...  
1003  
1004 KE Just lots of blood tests.  
1005  
1006 GM Yes, blood tests, I think, and just kept there, and then I've put here 'lots more girls  
1007 coming' and unfortunately going', because there was one more batch that they'd decided  
1008 that I... we thought that was the last batch, the one that I was on. But they'd decided that  
1009 they would have another batch, which was into June.  
1010  
1011 MHJ What day, do you remember?  
1012  
1013 GM That's '9<sup>th</sup> June'.  
1014  
1015 KE That's right.  
1016  
1017 GM And then 'started to seep, to bleed slightly. Please God, don't let me lose my baby.'  
1018  
1019 KE Yes, that's in your notes.  
1020  
1021 GM Is it really?  
1022  
1023 KE Yes.  
1024  
1025 MHJ 12<sup>th</sup> is it?  
1026  
1027 GM 12<sup>th</sup> yes. 'P237 has gone home – not worked again. So disappointed for her. All clear  
1028 again; thank goodness. Must be careful.'

1029  
1030 MHJ This is on 13<sup>th</sup>.  
1031  
1032 GM 13<sup>th</sup>. Obviously, having days when I'm bleeding again: 'Sent to bed to lie flat.'  
1033  
1034 MA That's on 16<sup>th</sup>.  
1035  
1036 GM 16<sup>th</sup> June. 'Mr Steptoe came in to see me; he is very happy with results so far.' And  
1037 I've put up here '42<sup>nd</sup> day,' and that's into 19<sup>th</sup> June. 'Jimmy and I went out to The Turk's  
1038 Head for lunch; Bob joined us. We had to walk; he wouldn't let me go in the car. Bob said,  
1039 we'll walk up to the Turk's Head and have a pint; you can have an orange. Went out again to  
1040 The Turk's Head; Bob came with us, had a very nice time.'  
1041  
1042 MHJ That was on 22<sup>nd</sup>.  
1043  
1044 GM 22<sup>nd</sup>, yes. 'So nice to get out of Kershaw's for a while. So sad to see the other girls all  
1045 going home. 21 girls together so far.' So I must have written that twice. 'Pregnancy test  
1046 done. Hospital for positive – can't believe it.'  
1047  
1048 MHJ Mm-hmm. That was on 2...?  
1049  
1050 GM That was on 23<sup>rd</sup>, but I knew already, because I'd gone off, by that time, coffee and  
1051 cucumber, which...  
1052  
1053 MHJ Mm-hmm, coffee and cucumber.  
1054  
1055 GM Oh, just the, even the smell of cucumber made me throw up. So, I thought, this is...  
1056  
1057 MHJ Cucumber's weird, isn't it?  
1058  
1059 KE Certainly is weird.  
1060  
1061 GM And, thing is, I can't, I can't get over that – coffee, cucumber.  
1062  
1063 MHJ And you still can't eat cucumber or are you okay now?  
1064  
1065 GM No, funnily enough, it took me years to get back on to it. But coffee, I still, I don't  
1066 really drink coffee very much. But isn't that funny? Just, I couldn't, even the smell of coffee;  
1067 and that was the first sign. Oh, I've gone right off coffee.  
1068  
1069 KE So, how much longer did you stay down there?  
1070  
1071 GM 'Got to be very careful and not overdo things', and I've put, written up here – don't  
1072 know why – 'watch', and that's 28<sup>th</sup> June. 'Home; Jimmy came for me and we drove back.'  
1073  
1074 MHJ So, that was on 29<sup>th</sup>.  
1075

1076 GM That was 29<sup>th</sup> June.  
1077  
1078 MHJ Yes. All right, which year are we in now? 7...?  
1079  
1080 KE 78, yes.  
1081  
1082 GM Yes, 1978.  
1083  
1084 KE So, that's just a month before they finished completely, and it was...  
1085  
1086 GM Yes, because the girls were already starting to come back in and one of the girls that  
1087 I'd become very friendly with, P268...  
1088  
1089 KE Mm-hmm, she had a miscarriage.  
1090  
1091 GM Yes. She was in that second batch.  
1092  
1093 KE She got pregnant, yes. That's right.  
1094  
1095 GM And she, in the book, this book (*A Matter of Life*), it says she came, she was pregnant  
1096 before me. She wasn't because...  
1097  
1098 KE She wasn't, no. She was after you.  
1099  
1100 GM I've persuaded her, because she said to me, I'm giving up Grace, and I said, P268, I've  
1101 got a feeling about you; please don't give up. Come back. So she came back in and I saw her.  
1102 She came back in and she, when I left, she was still there, and she did become pregnant, but  
1103 she lost her little boy at five months. It was tragic. Then, but she's got her two little girls and,  
1104 well, they're quite big girls now, and...  
1105  
1106 KE What, did she have...?  
1107  
1108 GM Two girls here [at Bourn Hall].  
1109  
1110 KE Oh, here?  
1111  
1112 GM She came back to Bourn, but she doesn't, unfortunately, she didn't want any  
1113 publicity at all, but I will ask her, if you want, to see if she would speak to you.  
1114  
1115 MHJ Mm-hmm. Would be quite nice if she could, and even if she wants to be interviewed  
1116 anonymously.  
1117  
1118 GM Oh, yes, well, I'll say that to her, if I can...  
1119  
1120 MHJ Because, obviously, any names on this, we'll delete or put some way of indicating.  
1121  
1122 GM Yes. Oh, yes please. I never asked you about it; I forgot.



1123  
1124 MHJ Yes. No, no, don't worry. No, don't worry.  
1125  
1126 GM Because she does not want any... the girls don't even know.  
1127  
1128 KE Oh, really?  
1129  
1130 GM Well, that's what I always found; well, its her, you know, it was her choice.  
1131  
1132 MHJ No, it was very common in those days. It was very common, because it was almost a  
1133 stigma to be an IVF baby.  
1134  
1135 MHJ Did you find this with Alistair?  
1136  
1137 GM Well, I wasn't, I didn't tell anybody. I mean, even my parents, I was told not to tell.  
1138 That was part of the agreement that... and I think Bob and Patrick did it in the, with the best  
1139 of motives, but they didn't want to stigmatise the children and so it was a, I mean, it was a  
1140 real shock to me when I, first of all discovered that I was the second, because I didn't, I had  
1141 no idea. I thought there, with going by the number of other girls coming in and out, I  
1142 thought, between when Leslie became pregnant and I did, surely there must be a lot more.  
1143 But, it was a reporter from a newspaper who came to my door, from Lennoxton when we  
1144 lived there and said to me, you know, are you Grace Montgomery? I went yes. Do you, you  
1145 were having the second IVF baby and – well, test-tube baby, he called it, test-tube baby, and  
1146 I said, no. You know, and he said, oh, yes you are.  
1147  
1148 And I went, well, I don't know where you've got your information, and he, actually, was  
1149 quite honest about it. He said, well, it was a nurse at the hospital who'd told him. I thought  
1150 that was horrific. So, he, actually, came in. We, I invited him in and we begged him. We said,  
1151 look, we don't want any publicity. You've given us news of something we didn't even know.  
1152 So, can you not understand what it feels like to suddenly be put in this goldfish bowl? If  
1153 you're going to put this in the paper, and by that time, of course, we knew what Lesley  
1154 and... what they'd been going through. So, I just, I couldn't live like that, and then it was, he,  
1155 very graciously – I don't know how, for a newspaper reporter – he agreed to hold the story,  
1156 and he didn't publish until...  
1157  
1158 KE After Alistair was born.  
1159  
1160 GM Well, there was a, no there was an article, about November or something like that, I  
1161 think.  
1162  
1163 KE There was an article on him.  
1164  
1165 GM Because I know we had to leave home. We, you know, we, actually, had to go away.  
1166  
1167 KE Really?  
1168

1169 GM Yes. Mm-hmm. So, there was quite a lot of that. You know, it was stressful, because  
1170 we couldn't stay in our house, because of the press.  
1171  
1172 MHJ That was in the local paper, was it?  
1173  
1174 GM No, it was the Sun Newspaper. But he was very good; he did hold off, but he printed  
1175 because he said that there was, it would come out and it was going to be in other papers  
1176 anyway, so someone else had...  
1177  
1178 MHJ So, this came out in the Sun in November of...?  
1179  
1180 GM It was, I can't remember but it was something like that.  
1181  
1182 MHJ 78  
1183  
1184 KE November 78, yes.  
1185  
1186 GM Uh-huh. So, we were, we immediately got hold of Patrick and Bob and said what do  
1187 we do? And they suggested that we sign an exclusive...  
1188  
1189 KE Agreement.  
1190  
1191 GM Agreement with the Mail at the... don't talk to Alistair about The Mail; he, absolutely  
1192 hates them, because he feels that they've, you know, they treated Bob and Patrick very  
1193 badly. You know, but they, that was the agreement: that we would do that on the  
1194 understanding that it was just, really going to be, like, a one-off article. So, there was one –  
1195 well, not a one-off article, but there were, there was an agreement that would, they would  
1196 keep the rest of the press at bay, really – so, there was an article, came out I November...  
1197 because I was still teaching. I was still working in Glasgow, and I remember they arrived at  
1198 my work, which I was horrified at, and then they interviewed us, and, of course, then it was  
1199 in the papers; so then we couldn't go home again, because there was, there were so many  
1200 other press from all over the world. That was in about the November...  
1201  
1202 KE So, what did you do? Where did you go?  
1203  
1204 GM Well, I, again, poor Steve, my best friend, she's still my best friend, Stephanie – I call  
1205 her Steve – lived in Glasgow and nobody would have... so we stayed there, and what made  
1206 us laugh really was, one of their neighbours about three doors up was the Editor of The  
1207 Glasgow Herald. His reporters were looking everywhere for us and we were just down the  
1208 road. But I don't think, I don't think George would have said anything anyway, because he  
1209 knew us, but so we stayed with them for about a week and then I went to my mum's  
1210 because it had quietened down there and then eventually we were able to go back home.  
1211 But I remember that from November; I had to, then I gave up my work, because it was, it  
1212 was six months, supposedly. Then, because Alistair was due on 14<sup>th</sup> February... but that  
1213 seemed to... that whole month was really into December was very stressful and then my  
1214 waters broke on Hogmanay, so, but David McKay Hart managed to keep it...  
1215

1216 KE For another two... yes.  
1217  
1218 GM Well, that stopped me for another two weeks.  
1219  
1220 KE Yes, for another two weeks, yes.  
1221  
1222 GM Mm-hmm. You know, because I was rushed into the hospital from Lennoxton in a  
1223 snow blizzard in my next-door neighbour's Land Rover because it was the only car we could  
1224 get out the street.  
1225  
1226 MHJ Story of high drama.  
1227  
1228 GM It's like, how are we going to get out of here in, you know, three-foot drifts of snow?  
1229  
1230 MHJ So, did the reporters come to the hospital and so on?  
1231  
1232 GM Yes, but, again, there were, the staff and everybody were wonderful. Even the other  
1233 girls in the ward were really protective and, I mean, I couldn't fault, you know, that nobody,  
1234 not one single person talked; none of our neighbours gave away anything. When I think  
1235 what Lesley and John, poor souls, went through. You know, like, people camping out. Our  
1236 *cul de sac*, our next-door neighbour blocked it off with his car. They were so protective of  
1237 us. You know, because they...  
1238  
1239 MHJ How long did the press interest go on?  
1240  
1241 GM Up until, well, I think, it, kind of, eased off a little bit once Lesley and John and Louise  
1242 came up and stayed with us in the... well, Alistair would have just been about a month old,  
1243 and then we had, they had one big article with the, this one here.  
1244  
1245 KE With the two babies, yes.  
1246  
1247 GM With the two babies, you know, the one.  
1248  
1249 KE Yes, I've got that one upstairs.  
1250  
1251 GM Yes. Good, is it round about here that... they, you know, when the two of them, you  
1252 know... when you see them now. Gosh, when you see that she's only, what? Just about, not  
1253 quite six months older than him and he...  
1254  
1255 MHJ Tiny.  
1256  
1257 GM They were both exactly the same weight: 5 lb, 12 Oz, but, I mean, he, there was this  
1258 amazing doctor that I used to have to... when I went in for my checkups at the hospital: Dr  
1259 Amoa from West Africa. Great big bloke with a great sense of humour and he used to do the  
1260 scan, and he would say, I think, you've got your dates wrong. This is going to be quite a big  
1261 baby. And I said, no, I don't think I've got my dates wrong, Dr Amoa. Oh, well, you know, I

1262 think, this baby's bigger than you're... Oh, right. And he came in the day Alistair was born  
1263 and he went, I suppose you think that's funny? The date's wrong indeed!!  
1264  
1265 MHJ Wonderful, yes.  
1266  
1267 GM It was, it was great.  
1268  
1269 MHJ So, then, after that joint photo, the press interest...?  
1270  
1271 GM Eased off every now and again, but then, we decided to move house. It would be  
1272 easier so that, you know, because there, it was a bit like being in a fish bowl. So, we moved  
1273 to Denny, where I still am, but in a house, which was in the country. So, kind of, isolated,  
1274 and there was only once, when Alistair was really quite young, when a reporter – well, he  
1275 was, actually, the editor of a newspaper – came to the door and he said, oh, he'd just found  
1276 out that we were here and could he do this article? So, again, we invited him in – have a  
1277 whisky – and the weirdest thing was, we eventually ended up as his neighbour. He lived  
1278 across the road from us when we moved to where we live now, and, well, I have been living  
1279 in, you know, for the last 20-odd years. But he was, he was the Editor of, by that time, The  
1280 Herald, and when we explained everything about it, he said, don't you worry; leave it with  
1281 me, and he looked after us. He was our guardian after that and he kept the rest of the press  
1282 away. So, but that was, we had peace for, you know, a very long time, because I think, he  
1283 just put it out that, don't bother them, because you're not going to get, you're not going to  
1284 get an article from them.  
1285  
1286 MHJ So, when we were talking informally last time, you said you didn't, explicitly say  
1287 anything to Alistair?  
1288  
1289 GM No, I didn't.  
1290  
1291 MHJ But he, in fact, raised it with you?  
1292  
1293 GM Yes.  
1294  
1295 MHJ Can you tell us about that?  
1296  
1297 GM Well, I didn't see the need to explain to Alistair, because he was just my little boy  
1298 and then, of course, we then went through the trauma of, when Alistair was only four, of  
1299 Jimmy and I splitting up. I hadn't realised – by that time, he had somebody else, so he'd left  
1300 and we then had, we moved house and Alistair had to move school and we moved where I  
1301 live now, or we both live, and I just thought, he's a very... I had enough on my mind to try  
1302 and keep him as a normal, happy little boy with just one parent.  
1303  
1304 KE As a single... Absolutely, yes.  
1305  
1306 GM So, and he seemed to be settling in at school and all the rest of it, and then in 1988,  
1307 when Pat, when, unfortunately, Patrick died, I heard Alistair, you know, went, no! And I  
1308 thought, oh, my goodness, what's happened? And he came rushing into my room in the

1309 morning and said, Mum, I now know why I'm a special baby. Because my mum always called  
1310 him, where's our special baby? Or where's our special boy? But she never, he never thought  
1311 anything of it; it's just his gran, you know, and grandfather, because he adored them. And I  
1312 said, what do you mean Alistair? And he said, Mum, I've just seen on the news, Uncle  
1313 Patrick – because he'd called him Uncle Patrick, when he'd seen him and Uncle Bob – he  
1314 said, Uncle Patrick's just died and I've just seen Louise on the, on the television and I now  
1315 know why Gran calls me a special baby, and I went, what do you mean? And he said, well, I  
1316 must be the same. So, he'd worked it out. He'd worked it out for himself. But he was  
1317 distraught, you know, about, you know...

1318

1319 KE Mm-hmm. So, he saw Bob and Patrick a few times when he was growing up? Yes.

1320

1321 GM Yes, uh-huh, and, but although, obviously, as, because he was, as he got older, he  
1322 could... he looked on Bob as, like another grandpa; he just loved him to bits. He thought the  
1323 world of him. But that was how he found out, and then, of course, it then broke in the press.  
1324 But he took it all in his stride. You know, his pals at school would say things like, you know,  
1325 how the heck did you climb out of your test-tube? Were the walls not awful slippery and did  
1326 you...? Were you sponsored by Pyrex?

1327

1328 MHJ Oh, it's like Louise's story that when she used to say people thought she should be  
1329 long and thin, with her hair sticking up out of the tube, you know.

1330

1331 GM I know, I know, but his pals were, as Alistair often said, his pals were great about it,  
1332 but they were just interested. They didn't call him names or anything. They just said, you  
1333 know, what is this all about? So, it really gave Alistair such an interest in finding out as much  
1334 as he could about I... which has been, you know, a real interest of his since he was a child.  
1335 So, no, he's taken it all in his, in his stride.

1336

1337 MHJ I think, kids will do if they get to know about it in the right way, at the right time and  
1338 are given a lot of support and love.

1339

1340 GM Mm-hmm.

1341

1342 MHJ That's my impression, that... I mean, in a sense, you weren't keeping it secret,  
1343 because you were, you were just not saying it.

1344

1345 GM That was it; I didn't see the need.

1346

1347 MHJ It was, and you were relating to Bob and Patrick.

1348

1349 KE Yes, you didn't see the need, yes. Absolutely, yes.

1350

1351 GM Uh-huh, I'd almost forgotten – well, I didn't. I would never, ever forget, because I  
1352 was so grateful every morning I woke up, but I just thought, well, it's there in the back of my  
1353 mind, but I don't, it doesn't have to be...

1354

1355 KE Yes, it's not a big issue. It's not an issue, yes.

1356  
1357 GM No, it was, from the point of view, it was a miracle and, but the miracle was Bob and,  
1358 Bob and Patrick's miracle; they were the ones that performed it. I mean, I was just blessed,  
1359 in that I was able to have my own, my own child, thanks to them. So, that was the way that I  
1360 always looked at it; I don't have to keep reminding Alistair.

1361  
1362 MHJ Did you ever think about having a second child through IVF?

1363  
1364 GM Oh, I would have loved it, but I've been on my own ever since, so I couldn't. But I've  
1365 just thought I was so grateful that... and so lucky to have Alistair.

1366  
1367 MHJ Can you...? You've talked a little about your egg club, The Ovum Club, or whatever?

1368  
1369 GM The Ovum Club.

1370  
1371 MHJ Yes, do you want to just talk a little bit about how that functioned and what you gave  
1372 to each other and how it all worked and so on?

1373  
1374 GM I think, because, obviously, there were, we had that bond and everybody, as they  
1375 came in, whoever was there before, immediately made the next girl coming in so welcome;  
1376 it was a lovely feeling. The first time I went down, P38 took me under her wing and she was  
1377 already in and she was just wonderful, and she was like the mother hen and explained, oh,  
1378 this, you know, this'll happen and that'll happen, but you'll be fine, you know. And she was  
1379 there the next time as well, you know, with, when I went down again. But in between, I  
1380 don't, I can't think how many times she must have gone through that, but you could almost  
1381 see that... oh, my goodness. I mean, she was amazing. What a girl she is, and it was so sad  
1382 that she never... you know, after her...

1383  
1384 KE Yes, after the first one.

1385  
1386 GM After she lost the first one, she never, it never happened again. But, I think that she  
1387 was, as I said, almost the instigator of, this is what we do: we look after each other. But it  
1388 was, became very natural. You know, we were all in the same boat and we supported each  
1389 other, we commiserated with each other, you know, when you knew that it wasn't, you  
1390 know, wasn't working. But there was, there was lots of fun as well, because you always had  
1391 to try and keep, you know, keep the morale up and we would all sit round and tell stories  
1392 and try our best to have a laugh and it was, as I said, it was just a real club. You know, the...

1393  
1394 MHJ I mean, some of the women must have been a bit bitter; did you ever pick that up?

1395  
1396 GM Not while they were there, because when they were, they were going, they were in  
1397 shock, quite a lot of them and very upset, and also upset because they were, we were, you  
1398 know, we were, we were going to miss each other, because when you're in for quite a long  
1399 time together, you become very close.

1400  
1401 MHJ Well, especially under those circumstances.

1402

1403 GM Yes. You know, so, that was the, I wouldn't say, I, there wasn't one person that I  
1404 would have said was bitter. Some were distraught. You know, they were just in such a state  
1405 and we were, that's why, you know, Bob had said to me, you mustn't get - or Patrick -  
1406 mustn't get upset, but it's very, very difficult when you, you know, you become really close  
1407 to people and you're seeing them going out and, you know, you're left behind. Yes, but it  
1408 was amazing, the number of girls who, when, I think, they had guessed, with me, and they  
1409 all, they all said, you know, we're thinking about you or praying for you and - I'm trying to  
1410 think - was it P268 that said, do it for us, Grace. And I said, no, no, you come back, and she  
1411 did.

1412

1413 MHJ But did you pick up the sense or did you feel yourself, that even if it hadn't worked,  
1414 you contributed to it working?

1415

1416 GM Well, we hoped that... yes, that was what, that was the one thing, I think, that made  
1417 us feel, kind of, good about it, was that, well, it was the one saving grace, really, that at  
1418 least, if it wasn't going to work for us, hopefully, it was going to work for someone else. It  
1419 was a very generous, I would say, all the girls were very generous about that, you know, that  
1420 feeling. They didn't resent anyone else, if they thought that they were going to be  
1421 successful. It was more a case of, well, we've done our best; maybe it's going to help  
1422 someone else. That's, certainly, the way I looked on it, and when I saw what P38 went  
1423 through; when she knew, when she started, there was no way it was going to work for her,  
1424 she was still doing that and when she was back in with me and she was hoping that it would  
1425 work. But she still had that wonderful positive attitude that, well, maybe not this time, but  
1426 maybe next time and if not me, for someone else.

1427

1428 MHJ Are you still in touch with her?

1429

1430 GM Yes.

1431

1432 KE Well, you can tell her from us, that she, certainly, she certainly did contribute.

1433

1434 MHJ Mm-hmm. Well, we've, well, I mean, we've kept you quite a long time, as it's been  
1435 fascinating. Is there anything else you want to tell us or anything we should have asked you  
1436 and we haven't?

1437

1438 GM I can't think of anything. Not really, no. I think, we've covered, really, the whole...

1439
